# 1 **Functional genomics of lipid metabolism in the** 2 **oleaginous yeast *Rhodospiridium toruloides***

3 Samuel T Coradetti<sup>a\*</sup>, Dominic Pinel<sup>b\*</sup>, Gina Geiselman<sup>b</sup>, Masakazu Ito<sup>b</sup>, Stephen  
4 Mondo<sup>c</sup>, Morgann C Reilly<sup>d,e</sup>, Ya-Fang Cheng<sup>b</sup>, Stefan Bauer<sup>b</sup>, Igor V Grigoriev<sup>c,f,g</sup>, John  
5 M Gladden<sup>d</sup>, Blake A Simmons<sup>d,h</sup>, Rachel B Brem<sup>a,f</sup>, Adam P Arkin<sup>b,g,i,^</sup>, and Jeffrey M  
6 Skerker<sup>b,h,i,^</sup>

7 <sup>a</sup>The Buck Institute for Research on Aging, Novato CA

8 <sup>b</sup>Energy Biosciences Institute, UC Berkeley, Berkeley CA

9 <sup>c</sup>United States Department of Energy Joint Genome Institute, Walnut Creek CA

10 <sup>d</sup>Joint BioEnergy Institute, Emeryville CA

11 <sup>e</sup>Chemical and Biological Processes Development Group, Pacific Northwest National  
12 Laboratory, Richland, WA

13 <sup>f</sup>Department of Plant and Microbial Biology, UC Berkeley, Berkeley CA

14 <sup>g</sup>Environmental Genomics and Systems Biology Division, Lawrence Berkeley National  
15 Laboratory, Berkeley CA

16 <sup>h</sup>Biological Systems and Engineering Division, Lawrence Berkeley National Laboratory,  
17 Berkeley CA

18 <sup>i</sup>Department of Bioengineering, UC Berkeley, Berkeley CA

19 \*These authors contributed equally to this work.

20 ^Corresponding authors, email: [skerker@berkeley.edu](mailto:skerker@berkeley.edu), [aparkin@lbl.gov](mailto:aparkin@lbl.gov)

21

## 22 **Abstract**

23 The basidiomycete yeast *Rhodospiridium toruloides* (a.k.a. *Rhodotorula toruloides*)  
24 accumulates high concentrations of lipids and carotenoids from diverse carbon  
25 sources. It has great potential as a model for the cellular biology of lipid droplets and for  
26 sustainable chemical production. We developed a method for high-throughput genetics  
27 (RB-TDNAseq), using sequence-barcoded *Agrobacterium tumefaciens* T-DNA  
28 insertions into the *R. toruloides* genome. We identified 1337 putative essential genes  
29 with low T-DNA insertion rates. We functionally profiled genes required for fatty acid  
30 catabolism and lipid accumulation, validating results with 35 targeted deletion  
31 strains. We found that both mitochondrial and peroxisomal enzymes were required for  
32 growth on fatty acids, with different peroxisomal enzymes required on different fatty  
33 acids. We identified a high-confidence set of 150 genes affecting lipid accumulation,  
34 including genes with predicted function in signaling cascades, gene expression, protein  
35 modification and vesicular trafficking, autophagy, amino acid synthesis and tRNA  
36 modification, as well as genes of unknown function. These results greatly advance our  
37 understanding of lipid metabolism in this oleaginous species, identify key biological  
38 processes to be further explored and optimized for production of lipid-based  
39 bioproducts, and demonstrate a general approach for barcoded mutagenesis that  
40 should enable functional genomics in diverse fungi.

## 41 Introduction

42 *Rhodospiridium toruloides* (also known as *Rhodotorula toruloides* (1)) is a  
43 basidiomycete yeast (subdivision Pucciniomycotina). *Rhodotorula/Rhodospiridium*  
44 species are widely distributed in the phyllosphere and diverse soils (2-5). They  
45 accumulate high concentrations of carotenoid pigments (6, 7), giving their colonies a  
46 distinctive orange, red, or pink hue. When *R. toruloides* is cultured under nitrogen (8),  
47 sulfur (9), or phosphorus (10) limitation, it can accumulate as much as 70% of cellular  
48 biomass as lipids (11), primarily as triacylglycerides (TAG).

49  
50 Eukaryotes accumulate neutral lipids in complex, dynamic organelles called lipid  
51 droplets. Lipid droplets emerge from the endoplasmic reticulum (ER) membrane as a  
52 core of TAG surrounded by sterol esters, a phospholipid monolayer derived from ER  
53 phospholipids, and a targeted ensemble of proteins mediating inter-organelle  
54 interaction, protein trafficking, cellular lipid trafficking and regulated carbon flux in and  
55 out of the lipid droplet (12-14). Aberrant lipid droplet formation contributes to many  
56 human diseases (15, 16) and impacts cellular processes as diverse as autophagy (17)  
57 and mitosis (18). *R. toruloides*' propensity to form large lipid droplets under a variety of  
58 conditions makes it an attractive platform to study conserved aspects of the cellular  
59 biology of these important organelles across diverse eukaryotes.

60  
61 *R. toruloides* is also an attractive host for production of sustainable chemicals and fuels  
62 from low-cost lignocellulosic feedstocks. Wild isolates of *R. toruloides* can produce  
63 lipids and carotenoids from a wide variety of carbon sources including glucose (19, 20),  
64 xylose (11), and acetate (21), as well as complex biomass hydrolysates (22). They are  
65 also relatively tolerant to many forms of stress including osmotic stress (23) and  
66 common inhibitors found in hydrolysates produced by common biomass deconstruction  
67 technologies, such as dilute acid pretreatment followed by enzymatic saccharification  
68 (24, 25). *R. toruloides* has been engineered to produce modified products such as fatty  
69 alcohols (26) and eucric acid (27) from synthetic pathways, demonstrating this species  
70 potential for production of diverse bioproducts. To enable more efficient production of  
71 terpene-derived and lipid-derived chemicals in general, *R. toruloides* has also been  
72 engineered for enhanced carotenoid (28) and lipid (8) production. These efforts, while  
73 promising, have for the most part employed strategies adapted from those  
74 demonstrated in evolutionarily distant species such as *Saccharomyces cerevisiae* and  
75 *Yarrowia lipolytica*. To truly tap the biosynthetic potential of *R. toruloides*, a better  
76 understanding of the unique aspects of its biosynthetic pathways, gene regulation and  
77 cellular biology will be required.

78  
79 Recently, transcriptomic and proteomic analysis of *R. toruloides* in nitrogen limited  
80 conditions (29) identified over 2,000 genes with altered transcript abundance and over  
81 500 genes with altered protein abundance during lipid accumulation. These genes  
82 included many enzymes involved in the TCA cycle, a putative PYC1/MDH2/Malic  
83 Enzyme NADPH conversion cycle (30), fatty acid synthesis, fatty acid beta-oxidation,  
84 nitrogen catabolite repression, assimilation and scavenging, autophagy and protein

85 turnover. Proteomics of isolated lipid droplets (31) identified over 250 lipid droplet-  
86 associated proteins including fatty acid synthesis genes, several putative lipases, a  
87 homolog of the lipolysis-regulating protein perilipin (32-34), vesicle trafficking proteins  
88 such as Rab GTPases and SNARE proteins, as well as several mitochondrial and  
89 peroxisomal proteins.

90

91 While these studies were unambiguous advances for the field, significant work remains  
92 to establish the genetic determinants of lipid accumulation in *R. toruloides*. Differential  
93 transcript or protein abundance under nitrogen limitation is suggestive of function in lipid  
94 accumulation, but transcriptional regulation and gene function are often poorly  
95 correlated in laboratory conditions (35). Similarly, sequestration in the lipid droplet may  
96 help regulate availability of some proteins for functions not necessarily related to lipid  
97 metabolism (36). More direct functional data would help the *R. toruloides* community  
98 prioritize this extensive list of genes for more detailed study and identify additional  
99 genes not identifiable by proteomic and transcriptomic methods. Finally, these studies  
100 highlighted dozens of genes with no known function, and hundreds more with only  
101 limited functional predictions. A more functional approach could shed more light on the  
102 most unique aspects of *R. toruloides* biology.

103

104 As the number of available fungal genomes has exploded in recent years (37, 38), tools  
105 to explore the function of uncharacterized genes have lagged behind sequencing  
106 capacity. High-throughput functional genomics approaches will help more effectively  
107 exploit our genomic resources. Fitness analysis on pooled mutant populations with  
108 DNA-based sequence barcodes (BarSeq) has proven to be a flexible, powerful  
109 approach for elucidating gene function in diverse species of bacteria (39-43) and some  
110 fungi (44). The combination of BarSeq with physical enrichment methods such as  
111 fluorescence-activated cell sorting has enabled genome-wide screens for phenotypes  
112 beyond simple growth (45). Early approaches required laborious construction of  
113 genome-wide libraries of targeted deletion mutants (38), but high-throughput  
114 sequencing has enabled random-insertion strategies in which barcoded transposons  
115 are mapped to insertion sites *en mass* (RB-TnSeq) (46, 47). Relatively low  
116 transformation efficiencies and a lack of functional transposon systems has been a  
117 limiting factor in the application of these techniques to diverse, non-model fungal  
118 species, however.

119

120 The plant-pathogenic bacteria *Agrobacterium tumefaciens* has evolved an efficient  
121 system to transfer virulence genes into eukaryotic cells. Once in the host cell, these  
122 transfer DNAs (T-DNAs) integrate randomly into the genome (46). *A. tumefaciens*  
123 mediated transformation (ATMT) has been used extensively to introduce exogenous  
124 DNA into plants (47-51), and has been demonstrated to transform diverse fungi at high  
125 efficiency (52). Recently, Esher et al. used ATMT followed by mutant selection and  
126 high-throughput sequencing to identify several mutants with altered cell wall  
127 biosynthesis in the human pathogen *Cryptococcus neoformans* (53). Their method is  
128 only viable for characterization of a small pool of highly enriched mutants, however.

129

130 In this study, we demonstrate the application of ATMT to the construction of a randomly  
131 barcoded, random insertion library (RB-TDNAseq) in *R. toruloides*. In mapping genomic  
132 locations of random insertions, we report the first full genome survey of essential genes  
133 in a basidiomycete fungi, consisting of 1337 probable essential genes including 36  
134 genes unique to basidiomycetes. We demonstrate that our barcoded mutant library is  
135 an effective tool to rapidly assess mutant phenotypes by exploring fatty acid catabolism  
136 in *R. toruloides*, confirming that mitochondrial beta-oxidation is essential for fatty acid  
137 utilization in this species. We also show that some members of its expanded  
138 complement of peroxisomal acyl-CoA dehydrogenases are necessary for growth on  
139 different fatty acids, suggesting substrate specificity or conditional optimality for each  
140 enzyme. We investigate perturbed lipid accumulation in the mutant pool by fractionation  
141 of the population by buoyancy and fluorescence activated cell sorting. We identify 150  
142 genes with significant roles in lipid accumulation, notably genes involved in signaling  
143 cascades (28 genes), gene expression (15 genes), protein modification or trafficking (15  
144 genes), ubiquitination or proteolysis (9 genes), autophagy (9 genes), and amino acid  
145 synthesis (8 genes). We also find evidence that tRNA modification effects lipid  
146 accumulation in *R. toruloides*, identifying 5 genes with likely roles in thiolation of tRNA  
147 wobble residues. These results significantly advance our understanding of lipid  
148 metabolism in *R. toruloides*; identify key biological processes that should be explored  
149 and optimized in any oleaginous yeast engineered for lipid production; support emerging  
150 evidence of deep connections between lipid droplet dynamics, vesicular trafficking, and  
151 protein sorting; and demonstrate a general approach for barcoded mutagenesis that  
152 should enable functional genomics in a wide variety of fungal species.

153

## 154 **Results**

155

### 156 **A functional genomics platform for *R. toruloides***

157 To enable functional genomics in *R. toruloides* IFO 0880, we first improved the existing  
158 genome assembly and annotation (36) using a combination of long-read PacBio  
159 sequencing for a more complete *de novo* assembly, a more comprehensive informatics  
160 approach for gene model predictions and functional annotation, and manual refinement  
161 of those models using evidence from mRNA sequencing (Genbank accession  
162 LCTV02000000, also available at the MycoCosm genome portal (38)), (see  
163 supplementary text for details). Summary tables of gene IDs, predicted functions, and  
164 probable orthologs in other systems are included in Supplementary file 1. For brevity,  
165 we will refer to *R. toruloides* genes by the common name for their *Saccharomyces*  
166 *cerevisiae* orthologs (e.g. *MET2*) when such orthologous relationships are  
167 unambiguous. Otherwise, we will give the MycoCosm protein ID, e.g. *RTO4\_12154* and  
168 *RTO4\_14576* are both orthologs of *GPD1*.

169

170 Because no method existed for high-throughput genetics in *R. toruloides*, we adapted  
171 established protocols for mapping barcoded transposon insertions (RB-TnSeq) (54), to  
172 mapping barcoded T-DNA insertions introduced with *Agrobacterium tumefaciens*

173 mediated transformation (ATMT). We call this method RB-TDNAseq (Figure 1A). In  
174 brief, we generated a diverse library of binary ATMT plasmids bearing nourseothricin  
175 resistance cassettes with ~10 million unique 20 base-pair sequence ‘barcodes’ by  
176 efficient type IIs restriction enzyme cloning (55), introduced the library into *A.*  
177 *tumefaciens* EHA105 by electroporation, then transformed *R. toruloides* with ATMT.  
178 Using a TnSeq-like protocol, we mapped the unique locations of 293,613 individual  
179 barcoded T-DNA insertions in the *R. toruloides* genome (see supplementary text for  
180 details). Once insertion sites were associated with their barcodes, pooled fitness  
181 experiments were performed using a simple, scalable BarSeq protocol as previously  
182 described (56).

183  
184 Insertions were sufficiently well dispersed to map at least one T-DNA in 93% of nuclear  
185 genes, despite some local and fine-scale biases in insertion rates (see supplementary  
186 text for details). Insertion density in coding regions was consistently around 10  
187 inserts/kb for most genes (Figure 1B). A subpopulation of genes with fewer than 2  
188 inserts/kb was highly enriched for orthologs of genes reported as essential in  
189 *Aspergillus nidulans* (57), *Cryptococcus neoformans* (58), *Saccharomyces cerevisiae*  
190 (59), or *Schizosaccharomyces pombe* (60), or for which only heterokaryons could be  
191 obtained in the *Neurospora crassa* deletion collection (38). We therefore infer that  
192 these genes are essential in our library construction conditions, or at least that mutants  
193 for these genes have severely compromised growth. Based on the above criterion, we  
194 identified 1337 probable essential genes, which we report in Supplementary file 1. This  
195 list includes over 400 genes not reported as essential in the above-mentioned model  
196 fungi and is enriched for genes with homologs implicated in mitochondrial respiratory  
197 chain I assembly and function, dynein complex, the Swr1 complex, and mRNA  
198 nonsense mediated decay. For a full list of GO term enrichments see Supplementary file  
199 1. This list also includes 36 genes unique to basidiomycetes.

200

### 201 **Mapping biosynthetic pathways using RB-TDNAseq**

202 Before investigating more novel aspects of *R. toruloides*’ biology, and to validate our  
203 methods, we wondered if RB-TDNAseq could be used to correctly annotate gene  
204 function in well-conserved biosynthetic pathways. Therefore, we investigated amino  
205 acid biosynthesis in *R. toruloides*. We cultured the mutant pool in defined medium (DM),  
206 consisting of yeast nitrogen base (YNB) and glucose, and in DM supplemented with  
207 amino acid and vitamins using drop-out complete mix (DOC). We then quantified  
208 insertion abundance in the starting and final populations using BarSeq. We applied the  
209 algorithms of Wetmore et al. (61) to compute an average fitness score (F) and T-like  
210 test statistic (T) for each gene. (see supplementary text for details) All fitness scores  
211 (averaged across biological replicates) and statistical tests reported here are available  
212 in Supplementary file 2 and online in a dynamic fitness browser, adapted from (62):  
213 <http://fungalfit.genomics.lbl.gov/>

214

215 Fitness scores for 6,558 genes in supplemented and non-supplemented media are  
216 shown in Figure 2A. Twenty-eight genes had significant, specific fitness defects in non-

217 supplemented media ( $T_{DM-DOC} < -3$ ,  $F_{DM} < -1$ ). Using an alternative, more conservative  
218 statistical approach (the Wilcoxon signed rank test (63, 64)), 23 of those genes were  
219 significantly less fit in non-supplemented media with a false discovery rate of 10% after  
220 multiple hypothesis correction (Supplementary file 2). When we grew the mutant pool in  
221 defined media with methionine or arginine supplementation (Figure 2B), these 28 genes  
222 for which mutants are auxotrophic partitioned into 11 mutants rescued by methionine,  
223 10 mutants rescued by arginine, six mutants rescued by neither amino acid and one  
224 mutant rescued by both amino acids. All of the identified methionine and arginine  
225 auxotrophic mutants have orthologous genes for which mutants are auxotrophic for  
226 methionine/cysteine or arginine, respectively, in *S. cerevisiae* or *A. nidulans*. These data  
227 show that using RB-TDNAseq, we can repeatably identify critical genes for robust  
228 growth in an experimental condition and that an appropriate threshold for statistically  
229 and biologically significant fitness scores is  $ITI > 3$ . Of 31 genes involved in methionine  
230 and arginine metabolism that we could expect to identify with RB-TDNAseq, 30 met  
231 these statistical thresholds (see supplementary text). These data demonstrate that our  
232 BarSeq analysis should identify most, if not all, non-essential genes that are required for  
233 a specific biological process.

234

### 235 **Fatty acid catabolism in *R. toruloides***

236 We next sought to understand how *R. toruloides* breaks down distinct fatty acids when  
237 used as growth substrates, as a window onto the complexity of lipid metabolism in this  
238 fungus. For this purpose, we used RB-TDNAseq to measure mutant fitness on three  
239 fatty acids as the sole carbon source: oleic acid (the most abundant fatty acid in *R.*  
240 *toruloides* (65, 66)), ricinoleic acid (a high-value fatty acid produced naturally in plants  
241 (67, 68) and synthetically in fungi (69)), and methyl-ricinoleic acid (a ricinoleic acid  
242 derivative used in lactone production (27, 70)). A total of 129 genes had significant  
243 fitness scores on one or more fatty acids including genes implicated in beta-oxidation of  
244 fatty acids, gluconeogenesis, mitochondrial amino acid metabolism, and several other  
245 aspects of cellular metabolism and gene regulation (See Figure 3 – Supplement 1 and  
246 the Supplemental text for a clustering analysis of fitness scores for these genes and  
247 Supplemental file 2 for a complete list).

248

249 We were particularly interested in beta-oxidation of fatty acids in the peroxisome and  
250 mitochondria, as these pathways are critical for lipid homeostasis (71-73), with major  
251 implications for both human health (74, 75) and metabolic engineering in fungi (76, 77).  
252 Fitness scores for *R. toruloides* genes homologous to enzymes with known roles in  
253 beta-oxidation of fatty acids are shown in Figure 3A. The localization for these enzymes  
254 is inferred mostly from homology to distantly related proteins in ascomycete fungi or  
255 mammalian species, but orthologs of five enzymes were localized to the predicted  
256 compartments using GFP fusion constructs in *Ustilago maydis* (78), demonstrating that  
257 localization is conserved across different species of basidiomycete fungi for at least  
258 some of these enzymes.

259

260 Mutants for mitochondrial enzymes had the most consistent fitness scores across all  
261 three fatty acids, whereas mutants for the peroxisomal enzymes and peroxins had more  
262 variable fitness scores among fatty acids. Mutants for seven peroxisomal beta-oxidation  
263 enzymes and three peroxins had different fitness scores on oleic acid versus ricinoleic  
264 acid and methylricinoleic acid (listed in supplementary text, full fitness scores in  
265 Supplementary file 2), while 11 other predicted peroxisomal beta-oxidation enzymes  
266 had no significant fitness scores at all. The six predicted peroxisomal acyl-CoA  
267 dehydrogenases had particularly varied functional importance. Two were most  
268 important for ricinoleic acid and methylricinoelic acid utilization (*RTO4\_10408* and  
269 *RTO4\_14567*), one was most important for oleic acid utilization (*RTO4\_8963*) and three  
270 were not necessary for growth on any of these fatty acids. These results demonstrate  
271 how RB-TDNAseq can be used to rapidly identify condition-specific functions among  
272 closely related members of a gene family for further genetic analysis or biochemical  
273 characterization. All together our data are consistent with a model of fatty acid beta-  
274 oxidation in *R. toruloides* in which diverse long-chain fatty acids are shortened in the  
275 peroxisome and a less structurally diverse set of short-chain fatty acids are oxidized to  
276 acetyl-CoA in the mitochondria (Figure 3 – figure supplement 2).

277  
278 To validate our fitness data on fatty acids, we made targeted deletion mutants for  
279 several predicted peroxisomal and mitochondrial proteins. These strains were  
280 constructed by homologous recombination into a strain of *R. toruloides* IFO 0880 made  
281 deficient for non-homologous end joining by deleting *YKU70* (a.k.a. *KU70*) (14, 79, 80).  
282 We grew these mutant strains on oleic or ricinoleic acid media and compared their  
283 growth to the parental *YKU70Δ* strain in mid-log phase. Relative growth for the deletion  
284 strain for each gene is compared to its fitness scores in the BarSeq experiment in  
285 Figure 3B and Figure 3C. BarSeq fitness scores were reliable predictors of significant  
286 growth defects. The *PEX7Δ* mutant had similar fitness defects on both fatty acids, but  
287 mutants for *RTO4\_8673* (similar to *PEX11*) and *RTO4\_14567* (similar to *H. sapiens*  
288 *ACAD11*), had stronger fitness defects on ricinoleic acid, and the mutant for acyl-CoA  
289 dehydrogenase *RTO4\_8963* had stronger fitness defects on oleic acid as predicted from  
290 fitness scores. Over a 96-hour time course, the *RTO4\_14567Δ* mutant failed to grow at  
291 all on ricinoleic acid, whereas the *RTO4\_8963Δ* mutant and the *PEX11* homolog  
292 *RTO4\_8673Δ* mutant had more subtle phenotypes, approaching the same final density  
293 of the *YKU70Δ* control strain after a longer growth phase (Figure 3 – figure supplement  
294 3).

### 295 296 **Functional Genomics of Lipid Accumulation in *R. toruloides***

297 To dissect the genetic basis of lipid accumulation in *R. toruloides*, we needed to extend  
298 our BarSeq methods beyond growth-based fitness assays. We induced lipid  
299 accumulation by nitrogen limitation (*R. toruloides* lipid droplets visualized in Figure 4A),  
300 and used two measures of cellular lipid content to fractionate the mutant pool (Figure 4B  
301 and supplementary text). We used the neutral-lipid stain BODIPY 493/503 (12) and  
302 fluorescence activated cell sorting (FACS) to enrich populations with larger/more or  
303 smaller/fewer lipid droplets (81). We also used buoyancy separation on sucrose  
304 gradients to enrich for populations with higher or lower total lipid content (41). Because

305 many mutations can affect cell buoyant density independent of lipid accumulation (41),  
306 we also grew the mutant pool in rich media (YPD) and subjected it to sucrose gradient  
307 separation as a control for lipid-independent buoyancy phenotypes. For each pair of  
308 high and low lipid fractions, we then calculated an “enrichment score”, E, and T-statistic  
309 for each gene. E is analogous to our fitness scores based on growth, except that it is the  
310  $\log_2$  ratio of abundance in the high lipid fraction to the low lipid fraction, whereas F is the  
311  $\log_2$  ratio of final to initial abundance. Hierarchical clusters of enrichment scores for 271  
312 genes for which mutants have significantly altered lipid accumulation ( $|E| > 1$  and  $|T| >$   
313 3) are shown in Figure 5A. Enrichment scores, T-statistics, and multiple-hypothesis-  
314 adjusted significance scores from Wilcoxon signed rank tests for all 6,558 genes with  
315 sufficient BarSeq data are reported in Supplementary file 2.

316  
317 To assess the reliability of these enrichment scores in predicting phenotypes for null  
318 mutants, we constructed 29 single gene deletion mutants by homologous recombination  
319 in a *YKU70* $\Delta$  strain of IFO 0880 and measured lipid accumulation by average BODIPY  
320 fluorescence for 10,000 cells from each strain using flow cytometry (Figures 5B and  
321 5C). When enrichment scores from both assays were strongly positive (LA1), we found  
322 that 7 of 8 deletion mutants had the expected phenotype (i.e. increased lipid  
323 accumulation). When only one assay yielded a strongly positive score (clusters LA2  
324 and LA3), only 3 of 5 mutants had apparent increases in lipid content as measured by  
325 flow cytometry. Further, for the two mutants for genes in cluster LA3 with the greatest  
326 apparent increase in lipid content (*PMT4* and *RTO4\_10302*, similar to *C. neoformans*  
327 *CMT1*) that measurement was likely an artifact of incomplete cell separation. Both  
328 mutants formed long chains of cells (see Figure 7 –figure supplement 1 for microscopy  
329 images), which would be analyzed as a single cell by our FACS assay. Genes in  
330 clusters LA4 and LA5 had conflicting enrichment scores between the two assays. Of  
331 three targeted deletion strains for genes in these clusters, only one (*CCC1* $\Delta$ ) had a  
332 statistically significant phenotype, with decreased lipid accumulation. When the FACS  
333 assay gave a strongly negative score and there was no strong contrary buoyancy score  
334 (clusters LA6, LA7, and LA8), 10 of 13 mutants had reduced lipid accumulation. These  
335 data confirm that the both separation techniques are fundamentally sound, though in  
336 isolation each method has a significant rate of false positives. In combination, the two  
337 assays identified a large set of high-confidence candidate genes with important roles in  
338 lipid accumulation.

### 339 340 **Diverse predicted functions for lipid accumulation mutants**

341 We manually curated homology-based predicted functions for the 393 genes with  
342 significant fitness or enrichment scores in this study (Supplementary file 1). An  
343 overview of predicted localization and functions for genes we identified with roles in fatty  
344 acid utilization or lipid accumulation is shown in Figure 6, with more detail for mutants  
345 with increased and decreased lipid accumulation in Tables 1 and 2, respectively. Note  
346 that we have excluded genes for which only one enrichment technique indicated altered  
347 lipid accumulation from this analysis. Mutants with increased lipid accumulation (cluster  
348 LA1, 56 genes) were most notably enriched for genes involved in signaling cascades,



349 posttranslational protein modification and trafficking, and in amino acid biosynthesis.  
350 Mutants with decreased lipid accumulation (clusters LA6, LA7, and LA8, 94 genes) were  
351 most notably enriched for genes with roles in tRNA-modification; regulatory kinases and  
352 phosphatases; and genes involved in cellular recycling processes such as autophagy,  
353 ubiquitin-protease systems and the unfolded protein response.

354

#### 355 *Mutants with increased lipid accumulation*

356 Mutants in several homologs of known signaling genes had increased lipid  
357 accumulation, depicted in Figure 6 under “G Protein Switches”, “Kinases &  
358 Phosphatases”, and “Gene Expression”. Three GTPases, a GTPase-activating protein  
359 (GAP) and two guanine nucleotide exchange factors (GEFs) were in cluster LA1, along  
360 with two orthologs of *BMH1*. *BMH1* is a 14-3-3 family protein, involved in G protein  
361 signaling, the RAS/MAPK signaling cascade, and many other processes (82). The  
362 genes encoding calcineurin complex were also in this cluster as was another protein  
363 phosphatase and two protein kinases. Four genes with predicted roles in histone  
364 modification were included in cluster LA1 along with three transcription factors and the  
365 RNA splicing factor *CBC2*, which is involved in mRNA processing and degradation (83).

366

367 Mutants in ten genes with likely roles in protein modification, protein trafficking or other  
368 processes in the ER and Golgi led to increased lipid accumulation (Figure 6). These  
369 genes included three cargo adapter proteins, GPI anchor modifying protein *BST1*, the  
370 GTPase *RAS1* (which has been implicated in regulation of vesicular trafficking), and  
371 three probable glycosyltransferases. These results show that protein trafficking plays an  
372 important role in lipid accumulation in *R. toruloides*, as has been shown in other  
373 systems (84), though different ensembles of trafficking proteins may be involved in  
374 different species.

375

376 Disruption of sulfur assimilation also increased lipid accumulation, with five genes  
377 involved in sulfate conversion to sulfide clustering in LA1. The cysteine synthase *cysB*  
378 was also in this cluster, though *cysBΔ* mutants did not have significantly increased lipid  
379 accumulation in our flow cytometry assay. A *MET14Δ* mutant had significantly increased  
380 lipid content as expected (Figure 5B). In general, the sulfate assimilation mutants had  
381 reduced growth in low nitrogen conditions, as indicated by negative fitness scores for  
382 pre-enrichment control samples (Supplementary file 2). As expected, the auxotrophic  
383 mutants identified in our supplementation experiments also had compromised growth in  
384 low nitrogen conditions, though the phenotype was generally less severe, likely  
385 reflective of slower growth of the population generally. However, slower growth due to  
386 auxotrophy was not predictive of higher enrichment scores even for *MET2*, *MET6*,  
387 *MET12*, and *MET13*, which are required for methionine synthesis but not sulfate  
388 incorporation through cysteine (Figure 2 – figure supplement 2A). These data suggest  
389 that cysteine or intermediate sulfur compounds in the assimilation of sulfate to sulfide  
390 may be involved in regulation of lipid accumulation.

391

### 392 *Mutants with decreased lipid accumulation*

393 We found evidence that tRNA thiolation plays a role in lipid accumulation in *R.*  
394 *toruloides*. Enrichment scores for six genes known to be important in the thiolation of  
395 tRNA wobble residues (85) clustered together in LA7. Though these mutants also had  
396 apparent buoyancy phenotypes on YPD, two deletion strains (*NCS6Δ* and *NCS2Δ*) had  
397 reduced lipid content in pure culture (Figure 5C). Furthermore, we observed that for  
398 orthologs of *S. cerevisiae* genes with measured tRNA thiolation levels (86), a decrease  
399 in tRNA thiolation corresponded to a lower enrichment score (Figure 5 – figure  
400 supplement 1). Modification of tRNA wobble positions has been implicated in regulation  
401 of gene expression in response to heat shock (87) and sulfur (88) availability. Our  
402 observations suggest that in *R. toruloides* the refactoring of the proteome for efficient  
403 lipid accumulation requires fully functional tRNA thiolation. The role that tRNA thiolation  
404 plays in this metabolic transition is unclear and deserves more detailed study.

405

406 Efficient lipid accumulation also required the regulatory action of orthologs to the *H.*  
407 *sapiens* GTPase *Rab6* and the guanine nucleotide exchange factor *RGP1*, 9 protein  
408 kinases, 3 phosphatases or their binding partners. These genes are likely involved in  
409 signaling pathways mediating nutrient state. They include four genes with orthologs  
410 implicated in the regulation of glucose and glycogen metabolism (*VHS1*, *HRK1*, *GLC7*  
411 and *KIN1*) and four genes with orthologs involved in regulation of nitrogen catabolism  
412 (*PPH3*, *PSY2*, *SCH9*, and *ATG1*).

413

414 Mutants in nine core components of autophagy were deficient for lipid accumulation.  
415 The vacuolar protease *PRB1* and *SIS1* (chaperone mediating protein delivery to the  
416 proteasome) were also required for efficient lipid accumulation, as were six genes  
417 implicated in protein ubiquitination (Table 2). Ubiquitination can affect many aspects of  
418 gene function, but likely most of these genes participate in regulation of proteolysis.  
419 These results show that autophagy and recycling of cellular components are important  
420 for efficient lipid accumulation in *R. toruloides* and provide direct genetic evidence for a  
421 previous observation that chemical inhibition of autophagy using 3-methyladenine  
422 reduced lipid accumulation in the oleaginous yeast *Y. lipolytica* (89).

423

424 While most genes encoding enzymatic steps in fatty acid and TAG biosynthesis had too  
425 few insertions to calculate reliable enrichment scores (many are probable essential  
426 genes, see Supplementary file 1), mutants in six genes with predicted function in TAG  
427 synthesis resulted in lower lipid accumulation (see Figure 6 – figure supplement 1).  
428 Three of these genes directly mediated reactions in TAG synthesis: *RTO4\_12154*,  
429 *RTO4\_11043*, and *DGA1*. *RTO4\_12154* is one of two *R. toruloides* *GPD1* orthologs  
430 predicted to convert dihydroxyacetone phosphate (DHAP) into glycerol-3-phosphate  
431 (G3P) (85). *RTO4\_11043* is a distant homolog of *H. sapiens* *BSCL2* (seipin), which  
432 modulates the activity of G3P acyltransferase in nascent lipid droplets (90). *DGA1*  
433 catalyzes conversion of diacylglyceride into TAG (67). Three more genes were more  
434 peripherally involved in TAG biosynthesis: *ACS1*, *YEF1*, and *GUT2*. *ACS1*, acetyl-CoA  
435 synthetase (31), may supplement production of cytosolic acetyl-CoA from acetate.  
436 *YEF1*, encodes an NADH kinase that converts cytosolic NADH to NADPH (30). *GUT2*

437 converts G3P to DHAP and participates in the G3P shuttle for transfer of electrons from  
438 cytosolic NADH to mitochondrial NADH (30). Conversely, mutations in *NDE1* (encoding  
439 an alternative enzyme for cytosol/mitochondrial NADH exchange and known to affect  
440 activity of Gut2 (86, 91-93)) had an apparent increase in lipid accumulation. In sum, our  
441 fitness data are consistent with the known importance of the precursors acetyl-CoA,  
442 G3P, and NADPH for TAG biosynthesis. However, the interactions of NADH transfer  
443 and glycerol metabolism in *R. toruloides* deserve more detailed study, as our results  
444 stand in contrast to observations in *Y. lipolytica* that *GUT2* mutants had increased lipid  
445 accumulation (94). Furthermore, the predominant source of NADPH to supply fatty acid  
446 synthesis remains unexplored in *R. toruloides* (see supplementary text for further  
447 discussion).

448

449 Finally, *RTO4\_16381*, a distant homolog of *H. sapiens PLIN1* (perilipin), was also  
450 essential for high lipid accumulation, consistent with its homologs known roles in lipid  
451 body maintenance and regulation of hydrolysis (86, 93, 95). Our data are in accordance  
452 with previous observations that protein RTO4\_16381 (previously named Lpd1) localized  
453 to lipid droplets in *R. toruloides* and that a GFP fusion construct localized to lipid  
454 droplets when heterologously expressed in *S. cerevisiae* (94, 96-99). RTO4\_16381 is  
455 depicted as localized to the lipid droplet in Figure 6, along with eleven other lipid  
456 droplet-associated proteins with high confidence lipid accumulation phenotypes or  
457 significant fitness defects on fatty acids. The products of these genes were observed in  
458 proteomic analysis of *R. toruloides* lipid droplets by Zhu et al. (55), except for  
459 RTO4\_11043 (similar to human *BSCL2*) and DGA1 which have been localized to the  
460 lipid droplet in many other species (100-106).

461

#### 462 **Diverse morphological phenotypes for lipid accumulation mutants**

463 To further characterize the phenotypes of our lipid accumulation mutants, we performed  
464 differential interference contrast (DIC) and fluorescence microscopy. The mutants  
465 showed a variety of phenotypes with respect to both cellular and lipid droplet  
466 morphology. Eight examples are highlighted in Figure 7. While wild type cells most  
467 commonly had two lipid droplets of similar size, several high lipid accumulation mutants  
468 had qualitatively more cells with 3 or more lipid droplets (e.g. *MET14Δ*, Figure 7)) or  
469 cells with a single dominant droplet (e.g. *RAC1Δ*, Figure 7). *RAC1Δ* also had  
470 qualitatively larger, more spherical cells. A *KDEL-likeΔ* mutant with increased lipid  
471 accumulation also showed a defect in cell separation likely reflective of combined  
472 defects in lipid accumulation, secretion, and cell wall/septum formation. All strains had  
473 a wide variation in lipid droplet size, consistent with high variance in BODIPY intensity  
474 measured by flow cytometry (Figure 4 – figure supplement 2A). Most low-lipid strains  
475 appeared morphologically similar to wild type with smaller lipid bodies (Figure 7 – figure  
476 supplement 1). However, a *BSCL2-likeΔ* (seipin) mutant showed an even larger  
477 variation in droplet size than wild type, consistent with observations in *S. cerevisiae*  
478 mutants for the homolog *SEI1/FLD1* (107-110) and likely reflective of a conserved  
479 function in lipid droplet formation and efficient delivery of lipid biosynthetic proteins to  
480 the growing lipid droplet (111, 112). Autophagy mutants (*ATG2Δ*) had the most  
481 uniformly small lipid droplets in elongated cells with enlarged vacuoles. Overall, the

482 morphological phenotypes we observed in *R. toruloides* are similar to a number of  
483 previous microscopic screens for altered lipid accumulation in diverse eukaryotes (113).  
484

## 485 Discussion

486

### 487 **Bringing functional genomics to non-model fungi with RB-TDNAseq**

488 In this study, we employed a long-established method, *Agrobacterium tumefaciens*-  
489 mediated transformation, to extend barcoded insertion library techniques (8) into a non-  
490 model basidiomycetous fungi. We hope the wide range of species amenable to *A.*  
491 *tumefaciens* transformation (69, 114, 115) will allow RB-TDNAseq to be extended into  
492 fungal species for which it is not yet practical to construct random insertion libraries with  
493 other methods (e.g. transposon mutagenesis (116, 117) or *in vitro* transposition followed  
494 by homologous recombination (118)). We used RB-TDNAseq to map a sufficiently  
495 diverse set of insertion sites to measure the relative fitness of mutants in over 6,500  
496 genes by tracking strain abundance in the mutant pool after competitive growth or  
497 physical enrichment using a simple, scalable BarSeq protocol. The fitness scores  
498 generated in our high-throughput experiments were consistent with predicted and  
499 measured fitness for single gene deletion strains. Also, because our genomic coverage  
500 is relatively complete, our insertion mapping also constitutes an initial survey of  
501 essential genes. Like all systematic surveys, this list is provisional, but we hope it will  
502 serve as a useful resource for genetics in *Rhodospordium* species. These genes may  
503 also be potential targets for new antifungal strategies against basidiomycete pathogens,  
504 such as the closely related rusts of the Pucciniomycotina subphylum (119) and the more  
505 distantly related human pathogen *Cryptococcus neoformans* (117).

506

### 507 **New insights into fatty acid catabolism in *R. toruloides***

508 The presence of a probable mitochondrial fatty acid beta-oxidation pathway in *R.*  
509 *toruloides* has been noted previously (118). Our results confirm that this pathway is  
510 functional and essential for fatty acid utilization and add to mounting evidence that  
511 mitochondrial beta-oxidation is widespread in fungi (120). In mammals, some branched  
512 long-chain fatty acids are shortened in the peroxisome, then transferred via the  
513 acylcarnitine shuttle to the mitochondria for complete oxidation (44), while other long-  
514 chain fatty acids are metabolized solely in the mitochondria (121). *R. toruloides* has  
515 orthologs to the mammalian mitochondrial short, branched-chain and medium-chain  
516 acyl-CoA dehydrogenases *ACADSB* and *ACADM*, but not to the long-chain and very  
517 long-chain acyl-CoA dehydrogenases *ACADL* and *ACADVL*. Our observation that both  
518 peroxisomal and mitochondrial beta-oxidation were necessary for robust growth on fatty  
519 acids is consistent with conserved function for *ACADSB* and *ACADM* on short-chain  
520 fatty acids and a larger role for a diverse ensemble of peroxisomal acyl-CoA  
521 dehydrogenases and acyl-CoA oxidases in metabolism of longer-chain fatty acids. We  
522 also found that elements of the mitochondrial respiratory chain and amino acid  
523 biosynthesis were not essential for growth on glucose, but were necessary for robust  
524 growth on fatty acids. The importance of these pathways has been demonstrated in a  
525 gluconeogenic context in mammalian cells (122), so it remains unclear if their  
526 importance in *R. toruloides* amino acid catabolism is strictly in regards to efficient  
527 gluconeogenesis or if they also have more direct impacts on beta-oxidation.

528

529 We also observed differing fitness scores on oleic acid and ricinoleic acid for seven  
530 peroxisomal enzymes and three peroxins. We confirmed these phenotypes in deletion  
531 mutants for two acyl-CoA dehydrogenases (*RTO4\_14567* and *RTO4\_8963*) and the  
532 peroxin *RTO4\_8673*. One hypothesis that would explain these differing phenotypes is  
533 divergent substrate specificity for the beta-oxidation enzymes, with different peroxins  
534 mediating effective localization of different enzymes. Both acyl-CoA dehydrogenases  
535 and acyl-CoA oxidases belong to an ancient superfamily that has been subject to a high  
536 rate of duplication, loss and lateral gene transfer suggesting a high rate of  
537 neofunctionalization (71-73). Different substrate specificity has been reported between  
538 orthologous mitochondrial acyl-CoA dehydrogenase in mice and humans (81, 123).  
539 Peroxisomal acyl-CoA oxidases showed overlapping, but distinct substrate specificity  
540 that even varied between different species of *Arabidopsis* (32). Our results demonstrate  
541 how a barcoded insertion library can accelerate discrimination of function between  
542 closely related members of a diversified gene family. These data may guide metabolic  
543 engineering strategies or the comprehensive biochemical assays necessary to  
544 characterize substrate specificity and enzymatic properties. Fitness assays on a much  
545 larger panel of substrates should yield further insights into the individual functions of *R.*  
546 *toruloides*' diverse complement of peroxisomal enzymes and guide experimental design  
547 for their biochemical characterization.

548

#### 549 **Extending high-throughput fitness techniques to lipid production**

550 While pooled fitness experiments have been used extensively to identify novel gene  
551 function, work so far has primarily focused on growth-based phenotypes, with only  
552 limited exploration of other phenotypes (8). In this study we used two proven strategies  
553 for differentiating between cells with altered lipid accumulation, buoyant density  
554 centrifugation (30) and FACS (92, 94, 96, 124-128), and applied them to our barcoded  
555 mutant pool. Inconsistencies between the two assays and with respect to independent  
556 BODIPY staining of targeted deletion strains suggests significant false positive rates for  
557 each assay in isolation. When both assays were in agreement, however, 17 of 21  
558 deletion mutants had the expected phenotype in independent experiments. This  
559 approach identified 150 high confidence candidate genes with strong impacts on lipid  
560 accumulation under nitrogen limitation. While this set is likely incomplete, it  
561 complements previous transcriptional and proteomic studies to establish critical genes  
562 and cellular processes supporting lipid accumulation that deserve more intensive study.  
563 As has been noted in previous functional screens (99, 129-132), there was limited  
564 overlap between genes for which mutants had a detectable lipid accumulation  
565 phenotype in our study and genes with altered protein abundance in *R. toruloides* during  
566 lipid accumulation (35, 79, 97, 133, 134) (14 genes) or genes that co-purified with *R.*  
567 *toruloides* lipid droplets (5 genes) (98, 135, 136). The different ensemble of genes  
568 identified by each technique illustrate that these systems-level approaches complement  
569 each other, they do not replace each other.

570

## 571 **New insights into regulation of lipid metabolism in *R. toruloides***

572 Proteomic, transcriptomic, mutagenic and over-expression surveys of lipid metabolism  
573 have been carried out in several model eukaryotic systems including *S. cerevisiae* (91,  
574 137-139), *C. elegans* (12-14), *D. melanogaster* (95, 96), various mammalian cell lines  
575 (31), and *Y. lipolytica* (140) (see Supplementary file 5 for a summary of genes identified  
576 in 35 studies). While wide variations in analytical techniques, nutrients, and culture  
577 conditions as well as a diverse genetic space make systematic comparisons between  
578 these surveys extremely difficult, a few broad themes are apparent. Protein trafficking  
579 and organelle interaction are inextricably linked with lipid body formation, growth and  
580 mobilization. Membrane-bound G proteins in the endomembrane network have  
581 conserved roles regulating trafficking and cellular morphology in response to metabolic  
582 states. A complex network of signaling cascades, protein modifications and transcription  
583 factors mediate the transition to lipid accumulation or lipid mobilization. A major output  
584 of this regulation is amino acid metabolism. Lipid metabolism and autophagy are deeply  
585 linked in a complex manner. Our findings were consistent with these general themes,  
586 including some orthologs to genes identified in the studies above, but the importance of  
587 general functions was more conserved across species than the roles of specific  
588 orthologous gene sets. The genes and processes we identify here should be  
589 considered in any strategy to optimize lipid metabolism in *R. toruloides* specifically or  
590 oleaginous yeasts in general. Comparative study of these processes across diverse  
591 species in standardized conditions will likely be required to uncover which aspects are  
592 fundamental to lipid droplet accumulation, maintenance and variation, and which  
593 processes are integrated by specific regulatory circuits in a given organism.

594

### 595 *Organelle interactions and protein localization*

596 Long regarded as essentially inert spheres of lipid, eukaryotic lipid droplets have of late  
597 come to be recognized as complex, dynamic, organelles with unique proteomic content  
598 and regulated interaction with other organelles (79). In animal cells, seipin (*H. sapiens*  
599 *BSCL2*) is thought to mediate lipid droplet nucleation from the ER (141). The *BSCL2*  
600 homolog *SEI1* was found to have conserved function in *S. cerevisiae* and *H. sapiens*  
601 *BSCL2* functionally complemented a *SEI1Δ* mutant. Cells with abnormally small and  
602 abnormally large lipid droplets were also reported in an *SEI1Δ* mutant (142). We found  
603 evidence that the closest *R. toruloides* homolog for *BSCL2* (*RTO4\_11043*) has  
604 conserved function, as deletion mutants had quantitatively lower TAG content (as  
605 measured by flow cytometry) and qualitatively more cell-to-cell variation in lipid droplet  
606 sizes (by microscopy) than control strains. Perilipins (*H. sapiens* PLIN1-5) act as  
607 gatekeepers to the lipid droplet, regulating access by lipases (143) and possibly  
608 mediating interaction with mitochondria (144). Accordingly, we found that mutants for  
609 an *R. toruloides* perilipin homolog had reduced lipid accumulation. Protein trafficking  
610 between the ER and Golgi has been implicated in lipid droplet accumulation in *D.*  
611 *melanogaster*, specifically COPI retrograde transport is necessary to limit storage in  
612 lipid droplets (145). We found that disruption of *ERP1*, *ERP2*, *EMP24*, or *BST1*  
613 (implicated in ER to Golgi transport in COPII vesicles (14)) led to increased lipid  
614 accumulation. It is unclear at this time if COPI and COPII have different functions in

615 lipid body formation across different eukaryotes, or if differing components of ER to  
616 Golgi trafficking are more critical when lipids are synthesized *de novo* from glucose or  
617 incorporated from exogenous fatty acids. (Beller et al. (30) cultured *D. melanogaster*  
618 cells on oleic acid to maximize lipid droplet size). Increased lipid accumulation in  
619 mutants with defective COPII trafficking might also be a function of impaired protein  
620 quality control (146). *H. sapiens DNAJC3* is implicated in regulation of the unfolded  
621 protein response by controlling elongation factor 2 phosphorylation (147). The *DNAJC3*  
622 ortholog *RTO4\_14088* was a high confidence candidate for decreased accumulation as  
623 well. These data are consistent with a hypothesis that interaction between protein  
624 sorting, quality control and the unfolded protein response play a role in regulating lipid  
625 accumulation through modulation of protein translation. Alternatively, delivery of  
626 specific proteins to the lipid droplet via the vesicular trafficking system may be critical to  
627 lipid droplet growth and maintenance, or the effects of mutations in the endomembrane  
628 network on the lipid droplet may arise from redirection of carbon flux through membrane  
629 lipids.

630

#### 631 *G protein and kinase signaling cascades*

632 We identified 28 genes with high-confidence roles in lipid metabolism that are  
633 homologous to genes implicated in G protein-coupled kinase signaling cascades,  
634 including RAC, Ras and Rab family G proteins. Rab GTPases are implicated in several  
635 aspects of vesicular traffic (148) and are also thought to mediate droplet fusion and  
636 interaction with endosomes (76). Several Rab family members have been identified in  
637 lipid droplets in *R. toruloides* (149), *S. cerevisiae*, *D. melanogaster*, and mammals,  
638 though their functional roles there remain unclear. 14-3-3 family proteins are known to  
639 affect several cellular processes (150) including protein trafficking (30) and modulate  
640 activity of both G proteins (134) and kinases (30). Rac and Ras G proteins have diverse  
641 roles in regulating the actin cytoskeleton, cell proliferation, cell cycle progression and  
642 polarity (128) and tend to localize to cell membranes, interacting with lipid kinases and  
643 transmembrane receptors (151-153). Likely both Rac1 and Ras1 interact directly with  
644 the lipid body, as Rac1 was detected in *R. toruloides* lipid droplets during nitrogen  
645 starvation (64, 154-156) and the Ras1 ortholog Ras85D was detected in *D.*  
646 *melanogaster* lipid droplets (157, 158). We were unable to quantify fitness scores for  
647 *RHO1*, but that G protein was also found associated with lipid droplets in *R. toruloides*  
648 (157, 158) and *S. cerevisiae* (159, 160). Undoubtedly these G proteins and  
649 downstream kinases function in a complex network of specific interactions, likely with  
650 considerable rearrangement of interactions from those observed in other species (64,  
651 161, 162). Mapping these signaling networks in *R. toruloides* will require significant  
652 effort, but deep regulatory understanding will likely be required to truly optimize  
653 engineered pathways in any oleaginous yeast.

654

#### 655 *Autophagy and protein turnover*

656 In mammalian and fungal cells, inhibition of autophagy has been reported to both  
657 decrease (64) and increase (161) lipid content. These discrepancies may be reflective  
658 of competing roles in fatty acid mobilization from lipid droplets and lipid droplet



659 biogenesis, with different processes dominating in different cell types and under  
660 different conditions. Mechanisms of fatty acid mobilization have been proposed  
661 involving a macroautophagy-like process called lipophagy (17), a microautophagy-like  
662 process (microlipophagy) (8, 84), and autophagy-independent lipolysis (84). Why  
663 autophagy might be necessary for lipid droplet biogenesis is less clear, but autophagy-  
664 dependent recycling of membrane lipids to the lipid body has been demonstrated in  
665 mouse hepatocytes (162). Conversely, autophagy was also inhibited when TAG  
666 hydrolysis was impaired in HeLa cells (163) and when TAG synthesis or hydrolysis was  
667 blocked in *S. cerevisiae* (164) suggesting that these processes influence each other in a  
668 bi-directional manner. In both *Y. lipolytica* and *R. toruloides* several autophagy genes  
669 were transcriptionally induced under nitrogen starvation, co-incident with lipid  
670 accumulation (8). Further, in *Y. lipolytica*, chemical inhibition of autophagy strongly  
671 reduced lipid accumulation (165). In *S. cerevisiae* deletion of *ATG8* reduced lipid  
672 content, but that effect was lipolysis-dependent and *ATG3*, *ATG4*, and *ATG7* mutants  
673 were unchanged in lipid content (166).

674

675 Our findings demonstrated that autophagy was required for robust lipid accumulation in  
676 *R. toruloides*. While we cannot rule out a more direct role in lipid droplet growth and  
677 maintenance, a simple theory for this requirement is that autophagy is required for  
678 extensive recycling of cellular resources during lipid accumulation. Not only were  
679 several core components of autophagy necessary, but also the vacuolar proteases, and  
680 several proteins with predicted function in ubiquitination of proteins for proteosomal  
681 degradation. The methylcitrate cycle was required for robust lipid accumulation, which  
682 may be reflective of its proposed role in threonine recycling (167) or metabolism of  
683 propionyl-CoA from released odd-chained fatty acids (83, 168). How and why the role  
684 of autophagy in lipid droplet development varies by species and condition remains an  
685 open question, but *R. toruloides* is an attractive species in which to explore and answer  
686 those questions.

687

688 *Amino acid biosynthesis and lipid accumulation.*

689 We also noted that disruption of several amino acid biosynthesis genes, particularly  
690 genes involved in sulfate assimilation into cysteine led to increased lipid production.  
691 These data are consistent with the repression of amino acid biosynthesis genes  
692 observed in *R. toruloides* (82) and other oleaginous fungi (167) in nutrient limited  
693 conditions. Notably, mutants for genes involved in methionine biosynthesis but not  
694 required for sulfate assimilation did not have enrichment scores reflective of increased  
695 lipid accumulation, nor did several arginine biosynthesis genes, or other auxotrophic  
696 mutants such as insertions in *PHA2* or *ADE5*. Mutants for *ARG1* had higher lipid  
697 content, but other mutants in the arginine pathway either had mixed results between the  
698 buoyancy and FACS assays (*ARG5* and *ARG7*), T-statistics below our thresholds  
699 (*ARG2*, *ARG7*, and *ARG8*) or showed no sign of increased lipid content (*CPA1*, *CPA2*,  
700 and *ARG3*). These discrepancies suggest that the increased lipid accumulation  
701 observed for some mutants may not be simply attributable to redirection of carbon flux  
702 from amino acid biosynthesis, but might be the result of active regulation in response to

703 specific amino acids or metabolic intermediates. The transcriptional and proteomic  
704 response during nitrogen limitation in these mutants warrants deeper study.

705

#### 706 *tRNA thiolation, protein expression and carbon flux in nutrient limited conditions*

707 Posttranslational modification of tRNAs has long been known to be critical to efficient  
708 protein translation in general (83), but in recent years thiolation of the U34 base on  
709 tRNAs for lysine (UUU), glycine (UUG), and glutamate (UUC) has been recognized to  
710 play an important role in fungal metabolic regulation generally (40) and particularly in  
711 response to stress such as nutrient limitation (169) and heat shock (27). In *S.*  
712 *cerevisiae*, defects in tRNA thiolation significantly alter protein expression for a large  
713 number of genes, but the mechanism of that change is disputed. Both transcriptional  
714 (170) and translational (53) mechanisms have been proposed. A commonality in these  
715 studies, however, is the altered expression of genes related to amino acid biosynthesis,  
716 protein expression and carbon metabolism. We found that any disruption in the  
717 URM1/elongator complex or tRNA thiolation process reduced lipid accumulation in our  
718 experimental conditions. The dramatic metabolic changes entailed in lipid accumulation  
719 under nutrient limitation may make for an informative framework in which to explore the  
720 mechanisms by which tRNA thiolation interacts with cellular metabolism.

721

#### 722 *Uncovering function for novel genes*

723 In this study, we identified 46 *R. toruloides* genes with little or no functional predictions  
724 (Supplementary file 1), but which had important function in lipid metabolism as  
725 evidenced by reduced fitness when grown on fatty acids or altered lipid accumulation.  
726 These included 9 genes with broad conservation across ascomycete and basidiomycete  
727 fungi and 7 genes with conservation across several basidiomycete species. These  
728 genes are of particular interest for further study into their specific functions in lipid  
729 metabolism. Moreover, the mutant pool generated in this study should be an excellent  
730 tool to generate hypothetical functions for these genes and uncharacterized *R.*  
731 *toruloides* gene in general. Because the T-DNA insertions are barcoded, fitness  
732 experiments are inherently scalable to a large number of conditions. In this study, we  
733 examined a targeted set of conditions specifically aimed towards understanding lipid  
734 metabolism; however, we expect that generating a large compendium of fitness data in  
735 diverse conditions will enable a systematic survey of gene function in *R. toruloides*  
736 combining condition-specific data and cofitness analysis (53). We encourage the *R.*  
737 *toruloides* and broader fungal community to make use of this new resource.

738

#### 739 *Cell-to-cell variation in lipid accumulation*

740 We noted extreme cell-to-cell variation in total lipid content in wild-type and mutant  
741 strains. This variation was evident in BODIPY fluorescence intensities that varied over  
742 at least an order of magnitude within any given sample (Figure 4 – figure supplement 2)  
743 and a wide range of lipid droplet sizes visible in microscopy images (Figure 7). Extreme  
744 variation in lipid accumulation is typical across eukaryotes, and has emerged as a useful  
745 paradigm to explore phenotypic diversity within isogenic populations (36). Our results

746 indicate that *R. toruloides* may make a convenient system to dissect the genetic basis of  
747 single-cell phenotypic variation.

748

749

## 750 **Conclusions**

751 In conclusion, we believe that RB-TDNAseq holds great promise for rapid exploration of  
752 gene function in diverse fungi. Because ATMT has been demonstrated in numerous,  
753 diverse fungi, we expect this method will be portable to many non-model species.  
754 Because the fitness analysis is inherently scalable, it will enable rapid fitness analysis  
755 over large compendia of conditions. Cofitness analysis of such compendia will  
756 accelerate the annotation of new genomes and identify new classes of genes not  
757 abundant in established model fungi. In this study, we demonstrated the application of  
758 RB-TDNAseq to the study of lipid metabolism in an oleaginous yeast that has significant  
759 potential to become a new model system for both applied and fundamental applications.  
760 We identified a large set of genes from a wide array of subcellular functions and  
761 compartments that impact lipid catabolism and accumulation. These processes and  
762 genes must be considered and addressed in any metabolic engineering strategy to  
763 optimize lipid metabolism in *R. toruloides* and other oleaginous yeasts. Deeper  
764 understanding of the extreme cell-to-cell variation in lipid accumulation seen across  
765 eukaryotes will likely require deeper mechanistic understanding of these processes and  
766 their interaction with the lipid droplet. The principles learned from exploring lipid  
767 metabolism and storage across diverse eukaryotes will inform biotechnological  
768 innovations for the production of biofuels and bioproducts, as well as new therapies for  
769 metabolic disorders.

770

## 771 **Acknowledgements**

772 We thank Christopher Rao and Shuyan Zhang for initial advice and protocols for ATMT.

773 We thank Kelly Wetmore and Adam Deutschbauer for their guidance on technical  
774 aspects of TnSeq and BarSeq experiments. We thank Morgan Price for his assistance  
775 and advice on TnSeq and BarSeq analysis, as well as for hosting our data on the fitness  
776 browser.

777

778 This material is based upon work supported by the U.S. Department of Energy, Office of  
779 Science, Office of Biological and Environmental Research program under Award  
780 Number DE-SC-0012527. Preliminary work establishing genetic, culturing, and assay  
781 protocols with *R. toruloides* was funded by grants OO1605 and OO6J01 from the  
782 Energy Biosciences Institute at the University of California Berkeley. Work performed at  
783 the DOE Joint BioEnergy Institute (<http://www.jbei.org>) is supported by the U.S.  
784 Department of Energy, Office of Science, Office of Biological and Environmental  
785 Research, through Contract No. DE-AC02-05CH11231 between Lawrence Berkeley  
786 National Laboratory and the U.S. Department of Energy. The work conducted by the  
787 U.S. Department of Energy Joint Genome Institute (<http://jgi.doe.gov/>), a DOE Office of  
788 Science User Facility, is supported by the Office of Science of the U.S. Department of  
789 Energy under Contract No. DE-AC02-05CH11231 between Lawrence Berkeley National  
790 Laboratory and the U.S. Department of Energy.

791

792 This work used the Vincent J. Coates Genomics Sequencing Laboratory at UC  
793 Berkeley, supported by NIH S10 Instrumentation Grants S10RR029668, S10RR027303,  
794 and S10OD018174.

795

796

797

## 798 **Methods**

### 799 **Strains**

800 We used *R. toruloides* IFO 0880 (also called NBRC 0880, obtained from Biological  
801 Resource Center, NITE (NBRC), Japan) as the starting strain for all subsequent  
802 manipulations. We used *Agrobacterium tumefaciens* EHA 105 and plasmids derived  
803 from pGI2 (36) for *A. tumefaciens* mediated transformation (ATMT) of *R. toruloides*  
804 (strain and plasmid kindly provided by Chris Rao, UIUC). The barcoded mutant pool  
805 was constructed by ATMT. We made all gene deletions in a non-homologous end-  
806 joining deficient *YKU70Δ* background (171) by homologous recombination of a  
807 nourseothricin resistance cassette introduced by either ATMT or electroporation of a  
808 PCR product. For deletions made by ATMT we used flanking arms of ~1000-1500 bp  
809 for homologous recombination. We found that as few as 40 bp of flanking sequence  
810 were sufficient for homologous recombination of PCR products at many loci. All strains  
811 used in this study, and primers used for strain construction and verification are listed in  
812 Supplementary file 4.

813

### 814 **Culture conditions**

815 For most experiments, we used optical density (OD) as measured by absorbance at 600  
816 nm on a Genesys 20 spectrophotometer (ThermoFisher Scientific 4001-000) as a metric  
817 for growth and to control inoculation density. For IFO 0880 grown in rich media, 1 OD  
818 unit represents approximately 30 million cells/mL. Unless otherwise noted, cultures were  
819 grown at 30 °C in 100 mL liquid media in 250 mL baffled flasks (Kimble 25630) with 250  
820 rpm shaking on an Innova 2300 platform shaker (New Brunswick Scientific 39-M1191-  
821 0000) with constant illumination using a LumaPro 6W led lamp (Grainger 33L570). We  
822 used yeast-peptone-dextrose media (YPD, BD 242820) for general strain maintenance  
823 and rich media conditions. For auxotrophy experiments we used 0.67% w/v yeast  
824 nitrogen base (YNB) w/o amino acids (BD 291940) with 111 mM glucose (Sigma  
825 G7528) as our defined media and supplemented with 75 mM L-methionine (Sigma  
826 M9625), 75 mM L-arginine (Sigma A5006), or 0.2% w/v drop-out mix complete, which  
827 contains all 20 amino acids, adenine, uracil, p-Aminobenzoic acid, and inositol (US  
828 Biological D9515). To test growth and fitness on oleic acid (Sigma O1008 and 364525),  
829 ricinoleic acid (Sigma R7257), and methylricinoleic acid (Sigma R8750), we used this  
830 same defined media formulation with 1% fatty acid (by volume) instead of glucose. For  
831 lipid accumulation experiments, we pre-cultured strains for two generations in YPD (OD  
832 0.2 to OD 0.8) then washed them twice and resuspended them at OD 0.1 in low  
833 nitrogen medium; 0.17% w/v yeast nitrogen base (YNB) w/o amino acids or ammonium  
834 sulfate (BD 233520), 166 mM D-glucose, 7 mM NH<sub>4</sub>Cl (Fisher S25168A), 25 mM  
835 KH<sub>2</sub>PO<sub>4</sub> (Fisher P285-3), and 25 mM Na<sub>2</sub>HPO<sub>4</sub> (Sigma S0876). This is the C:N 120  
836 formulation from Nicaud et al. (54). Unless otherwise specified, cultures were harvested  
837 for lipid quantification or fractionation after 40 hours of growth and lipid accumulation.

838

### 839 **Genome sequencing and *de novo* assembly**

840 To generate an improved genome assembly for IFO 0880 we prepared genomic DNA  
841 for PacBio RS II sequencing (Pacific Biosciences). Genomic DNA was purified using a  
842 two-step protocol, first using glass bead lysis and phenol-chloroform extraction, as  
843 previously described (55), followed by a QIAGEN Genomic-tip 100/G method (QIAGEN,  
844 10243). All QIAGEN buffers were obtained from a Genomic DNA Buffer Set (QIAGEN,  
845 19060). Briefly, the dry genomic DNA pellet was first resuspended in G2 buffer  
846 supplemented with 200 µg/mL RNase A (QIAGEN 19101) and 13.5 mAU/ml Proteinase  
847 K (QIAGEN 19131), incubated at 50 °C for one hour, and then loaded on a Tip-100  
848 column. After three washes with QC buffer and elution with QF buffer, the DNA was  
849 precipitated with isopropanol and removed by spooling using a glass Pasteur pipet. The  
850 genomic DNA was washed with 70% ethanol and after air-drying, resuspended in EB  
851 buffer (pH 7.5). DNA concentration was determined by fluorometry (Qubit,  
852 ThermoFisher Scientific) and submitted to University of Maryland Genomics Resource  
853 Center for library preparation and sequencing. A 10 kb insert size selected (BluePippin,  
854 Sage Science) SMRTbell library was prepared and sequenced on a PacBio RS II  
855 platform using P4C2 chemistry and 10 SMRT cells. *De novo* assembly of 610,663  
856 polymerase reads (mean subread length of 5,193 bp) was performed using SMRT  
857 Analysis version 2.3.0.140936 (<http://www.pacb.com/support/software-downloads/>) and  
858 the RS\_HGAP\_Assembly.3 protocol (HGAP3) using default settings except for a  
859 genome size of 20,000,000 bp. The final assembly contained 30 polished contigs  
860 (mean coverage of 131-fold) with a total genome size of 20,810,536 bp. Paired-end  
861 Illumina data (17,817,326 PE100 reads, (172)) was used for error correction using Pilon  
862 version 1.13 (<https://github.com/broadinstitute/pilon>). As expected, the most common  
863 type of correction (569 in total) was insertion or deletion of a nucleotide in homopolymer  
864 regions. The final error corrected scaffolds were annotated by JGI and submitted to  
865 Genbank under the accession LCTV02000000. Raw sequence data (PacBio and  
866 Illumina) has been deposited in the NCBI SRA (SRP114401 and SRP058059,  
867 respectively).

868

### 869 **RNA sequencing and analysis**

870 To harvest RNA for improved gene model prediction, we inoculated *R. toruloides* into 50  
871 mL cultures in M9 Minimal Salts Solution (BD Difco 248510), 2 mM MgSO<sub>4</sub> (Sigma  
872 M7506), 100 µM CaCl<sub>2</sub> (Sigma C5670), and Yeast Trace Elements Solution (88 µg/mL  
873 nitrilotriacetic acid, 175 µg/mL MgSO<sub>4</sub> 7H<sub>2</sub>O, 29 µg/mL MnSO<sub>4</sub> H<sub>2</sub>O, 59 µg/mL NaCl, 4  
874 µg/mL FeCl<sub>2</sub>, 6 µg/mL CoSO<sub>4</sub>, 6 µg/mL CaCl<sub>2</sub> 2H<sub>2</sub>O, 6 µg/mL ZnSO<sub>4</sub> 7H<sub>2</sub>O, 0.6 µg/mL  
875 CuSO<sub>4</sub> 5H<sub>2</sub>O, 0.6 µg/mL KAl(SO<sub>4</sub>)<sub>2</sub> 12H<sub>2</sub>O, 6 µg/mL H<sub>3</sub>BO<sub>3</sub>, 0.6 µg/mL Na<sub>2</sub>MoO<sub>4</sub> H<sub>2</sub>O),  
876 pH 7.0, with 2% glucose (Sigma D9434) or 10 mM p-Coumaric acid (trans-4-  
877 hydroxycinnamic acid; Alfa Aesar A15167), and incubated overnight at 30 °C with 200  
878 rpm shaking. We harvested cultures at mid-log phase, centrifuged at 3000 RCF for 10  
879 minutes at room temperature, removed the supernatant and flash-froze the cell pellet in  
880 an ethanol/dry ice bath and stored at -80 °C. We lyophilized pellets overnight in a  
881 FreeZone-12 freeze dry system (LabConco 7754030) and extracted total RNA with a  
882 Maxwell RSC Plant RNA Kit (Promega AS1500) using a Maxwell RSC instrument  
883 (Promega AS4500). RNA was sequenced and mapped to the *R. toruloides* IFO 0880

884 genome at the Department of Energy Joint Genome Institute (JGI) in Walnut Creek, CA  
885 with in-house protocols.

886

### 887 **Gene model predictions and curation**

888 The improved genome assembly was annotated using the JGI Annotation pipeline (38).  
889 Owing to relatively small intergenic spacing in the *R. toruloides* genome, fused gene  
890 models were a common problem. We hand curated over 500 gene models by  
891 searching for homology to unrelated proteins at each end of the automated gene  
892 models and inspecting agreement with assembled transcripts from our RNAseq  
893 experiments. Briefly, for all protein models over 400 amino acids long, we used the N-  
894 terminal and C-terminal 30% of each sequence in separate BLAST queries (NCBI  
895 BLAST-plus software 2.2.30) to a custom database of proteins from 22 other eukaryotic  
896 genomes (see Orthology relationships, below). We then compared the significant  
897 alignments for each terminus of a given gene and scored them for disagreement in  
898 regards to the respective orthology groups to which each target sequence belonged with  
899 a custom Python script (scripts and data files available at  
900 <https://bitbucket.org/FungalTDNAseq/fusedgenemodels>). The top-scoring 500 gene  
901 models were manually inspected for uncharacteristically long introns and for predicted  
902 introns and exons not supported by RNAseq reads and modified as required using the  
903 Mycocosm genome browser. The current genome annotation is publicly available at the  
904 JGI Mycocosm web portal (55): [http://genome.jgi.doe.gov/Rphoto\\_IFO0880\\_4](http://genome.jgi.doe.gov/Rphoto_IFO0880_4)

905

### 906 **Orthology relationships**

907 We predicted orthologous proteins for our *R. toruloides* gene models in *H. sapiens*, *D.*  
908 *melanogaster*, *C. elegans*, *A. thaliana*, *C. reinhartii*, *S. cerevisiae*, and 16 other fungi  
909 with the orthomcl software suite version 2.0.9 (173). See Supplementary file 1 for a full  
910 list of ortholog groups and details on the genomes used in this analysis.

911

### 912 **Vector library construction**

913 To efficiently construct a large and diverse mutant pool of barcoded mutants we first  
914 constructed a large library of barcoded vectors with an optimized type II-S  
915 endonuclease cloning strategy (38). We modified the ATMT vector pGI2 (Ref: Appl  
916 Microbiol Biotechnol (2013) 97:283–295, DOI 10.1007/s00253-012-4561-7) to act as a  
917 barcode receiving vector by first removing the two pGI2 SapI sites already present on  
918 the vector backbone through SapI restriction digestion, treatment with T4 DNA  
919 polymerase for blunt end formation and subsequent blunt end ligation. Next, we  
920 introduced two divergent SapI recognition sites just inside the right border of the T-DNA  
921 (vector pDP11) as the integration site for random barcoding. We added the barcodes by  
922 synthesizing the oligonucleotide GATGTCCACGAGGTCTCTNNNNNNNNNNNNNNNNNN  
923 NNNNCGTACGCTGCAGGTCGAC and amplifying with primers  
924 TCACACAAGTTTGTACAAAAAGCAGGCTGGAGCTCGGCTCTTCGCCCGATGTCCA  
925 CGAGGTCTCT and  
926 CTCAACCACTTTGTACAAGAAAGCTGGGTGGATCCGCTCTTCAATTGTGCGACCTGC  
927 AGCGTACG. We then combined 4 µg of vector and 140 ng of barcode fragments in a

928 50  $\mu$ l reaction with 5  $\mu$ l 10x T4 ligase buffer, 5  $\mu$ l 10x NEB Cutsmart buffer (NEB,  
929 B7204S), 2.5  $\mu$ l T7 ligase (NEB, M0318L), and 2.5  $\mu$ l of SapI (NEB, R0569S). We  
930 incubated the reaction at 37 °C for 5 minutes, then 25 cycles of 37 °C for 2 minutes and  
931 20 °C for 5 minutes, before denaturing the enzymes for 10 minutes at 65 °C. Without  
932 cooling the product, we added 1  $\mu$ l SapI and incubated for 30 minutes at 37C to digest  
933 any uncut vector, then cooled to 10 °C. We purified the barcoded plasmids using a  
934 Zymo DNA clean and concentrator kit (Zymo Research D4014), eluting in 15  $\mu$ l of  
935 elution buffer and pooled 10 barcoding reactions. We then transformed *E. coli*  
936 electrocompetent 10 Beta cells (NEB) according to the manufacturers specifications in  
937 30 independent transformations. We estimated the diversity of the barcoded vector pool  
938 by performing barcode sequencing as described below, sequencing on an Illumina  
939 MiSeq system and estimating the true pool size by the relative proportion of barcodes  
940 with 1 or 2 counts. See the script Multicodes.pl from Wetmore et al. (174) for details.  
941 This yielded a barcoded pool estimated to consist of ~100 million clones.

942

#### 943 ***Agrobacterium* mediated transformation of *R. toruloides***

944 We transformed the barcoded vector pool into *A. tumefaciens* EHA 105 with a protocol  
945 adapted from established methods (174). We diluted a stationary phase starter culture  
946 1:100 in 500 ml Luria-Bertani broth (BD 244620) and cultured for 6 hours at 30 °C. We  
947 pelleted cells at 3000 RCF, 10 minutes, 4 °C, washed pellets in ice-cold 1mM HEPES  
948 (Fisher Scientific, BP310), pH 7.0, then washed them in ice-cold 10% glycerol 1 mM  
949 HEPES, suspended cells in 5 ml ice-cold 10% glycerol 1mM HEPES, and flash froze 50  
950  $\mu$ l aliquots in liquid nitrogen. To produce a large transformant pool of *A. tumefaciens*  
951 bearing millions of unique barcode sequences, we electroporated 5 ml of competent  
952 cells with 50  $\mu$ g of plasmid DNA in a BTX HT100 96-well plate chamber (50  $\mu$ l per well)  
953 with a 2.5 kV pulse, 400 ohm resistance and 25  $\mu$ F capacitance from a BTX ECM 630  
954 wave generator. We recovered cells in LB for 2 hours at 30 °C, and plated on LB agar  
955 with 50  $\mu$ g/ml kanamycin (Sigma, K4000). Approximately 14 million transformation  
956 events were scraped and collected into a mixed pool for transformation of *R. toruloides*.

957

958 We grew the barcoded *A. tumefaciens* pool to OD 1 in 50 mL YPD in a baffled flask at  
959 30 °C, then pelleted the cells and suspended in 10 mL induction medium (1 g/L NH<sub>4</sub>CL,  
960 300 mg/L MgSO<sub>4</sub> 7H<sub>2</sub>O, 150 mg/L KCl (Fisher P267-500), 10 mg/L CaCl<sub>2</sub> (VWR 0556),  
961 750  $\mu$ g/L FeSO<sub>4</sub> 7H<sub>2</sub>O (Acros 423731000), 48 mg/L K<sub>2</sub>HPO<sub>4</sub> (VWR 0705), 3.9 g/L  
962 NaH<sub>2</sub>PO<sub>4</sub> (Fisher BP329), 198 mg/L D-Glucose, 1 mg/L thiamine (Sigma T4625), and  
963 196  $\mu$ g/L acetosyringone (Sigma, D134406)) and incubated 24 hours at room  
964 temperature in culture tubes on a roller drum. We cultured *R. toruloides* in 10 mL YPD to  
965 OD 0.8, then pelleted the cells and suspended in the induced *A. tumefaciens* culture for  
966 5 minutes at room temperature. We filtered the mixed culture on a sterile 0.45  $\mu$ m  
967 membrane filter (Millipore, HAWP04700) then transferred the filter to induction media  
968 2% agar (BD 214010) plates for incubation at 26 °C for 4 days. We then washed the  
969 filters in sterile water and plated on YPD 2% agar with 300  $\mu$ g/ml cefotaxime (Sigma  
970 C7039) and 300  $\mu$ g/ml carbenicillin (Sigma C1389) and incubated at 30 °C for two days.  
971 We scraped these plates to collect transformed *R. toruloides*, recovered the mutant pool



972 in YPD plus cefotaxime and carbenicillin for 24 hours, added glycerol to 15% by volume  
973 and stored at -80 °C. We repeated this protocol 40 times to recover approximately 2  
974 million transformation events. In some rounds of transformation, we also included  
975 0.05% casamino acids (BD 223120) or 1% CD lipid concentrate (Gibco 11905-031) in  
976 the induction media plates to promote recovery of mutants with impaired amino acid or  
977 lipid biosynthesis. We then recovered each of these transformation subpools on YPD  
978 plus cefotaxime and carbenicillin 12 hours to clear residual *A. tumefaciens* and  
979 combined them into one master pool, divided it into 1 ml aliquots in YPD 15% glycerol  
980 and stored them at -80 °C.

981

### 982 **TnSeq library preparation**

983 To isolate high quality genomic DNA we harvested  $\sim 10^8$  cells from a fresh YPD culture  
984 of the mutant pool, washed the pellet in water and suspended in 200  $\mu$ l TSENT buffer  
985 (2% Triton X-100 (T8787-50ML), 1% SDS (Ambion AM9820), 1 mM EDTA (Sigma  
986 ED2SS), 100 mM NaCl (Sigma S5150), 10 mM Tris-HCl, pH 8.0 (Invitrogen 15568-  
987 025)). We then added the sample to 200  $\mu$ l 25:24:1 phenol/chloroform/isoamyl alcohol  
988 (Invitrogen 15593-031) in screw-top tubes with glass beads (Benchmark 1031-05) on  
989 ice and vortexed for 10 minutes at 4 °C. We added 200  $\mu$ l TE buffer (Ambion AM9858),  
990 centrifuged 20 minutes at 21,000 RCF 4 °C, removed the aqueous phase to 1 mL  
991 ethanol (Koptec V1016) and centrifuged 20 minutes at 21,000 RCF at 4 °C to pellet  
992 DNA. DNA was dried and suspended in 200  $\mu$ l TE, treated with 0.5  $\mu$ l RNase A (Qiagen  
993 19101), then purified with the Zymo Research Genomic DNA Clean and Concentrator  
994 Kit (D4064). We checked DNA quality on a 0.8% agarose E-Gel (Thermo Scientific  
995 G51808) and quantified with a Qubit 3.0 fluorometer using the dsDNA HS reagent  
996 (Invitrogen 1799096).

997

998 To sequence sites of genomic insertions we followed the TnSeq protocol of Wetmore et  
999 al. (55), using their Nspacer\_barseq\_universal primer and P7\_MOD\_TS\_index primers  
1000 for final amplification (Supplementary file 4). Because we found a high proportion of  
1001 non-specific products in our TnSeq mapping and highly variable recovery of the same  
1002 insertions between technical replicates, we sequenced multiple replicates for each batch  
1003 of ATMT mutants (around 10,000 – 100,000 mutants per batch) and used at least two  
1004 annealing temperatures for the final PCR enrichment for each batch. In total, we  
1005 sequenced about 900 million reads from 64 independent TnSeq libraries. A full  
1006 summary of TnSeq libraries used to map the mutant pool is listed in Supplementary file  
1007 4. Libraries were submitted for single-end 150 bp Illumina sequencing on a HiSeq 2500  
1008 platform at the UC Berkeley Vincent J. Coates Genomics Sequencing Laboratory,  
1009 except for subset of smaller runs on an Illumina MiSeq platform as indicated in  
1010 Supplementary file 4. Sequence data have been submitted to the NCBI Short Read  
1011 Archive (SRP116146).

1012

### 1013 **Mapping insertion locations**

1014 We used a similar strategy as Wetmore et al. (39) to map the location of each barcoded  
1015 T-DNA insertion, with minor alterations. Our modified code is available at:  
1016 (<https://bitbucket.org/FungalTDNAseq/rb-tdnaseq>)

1017  
1018 MapTnSeq\_trimmed.pl processes the TnSeq reads to identify the barcode sequence  
1019 and is a modified version of MapTnSeq.pl (62), with three minor alterations. We ignore  
1020 the last 10 bases of the T-DNA sequence, as the length of T-DNA border sequence  
1021 included in the final insertion is variable. We allow for barcode sequences of 17 – 23  
1022 basepairs instead of exactly 20. We report all TnSeq reads in which sequence past the  
1023 end of the expected T-DNA insert aligns with other regions of the T-DNA sequence, or  
1024 with the outside vector as ‘past end’ reads. These are mappings of junctions between  
1025 concatemeric T-DNA inserts and unprocessed T-DNA vectors, respectively.

1026  
1027 RandomPoolConcatemers.py is a custom script that associates barcode sequences  
1028 mapped in MapTnSeq\_trimmed.pl with genomic locations and then filters those  
1029 barcodes for insertions at unique, unambiguous locations. First, for all barcodes  
1030 sequenced, the number of reads mapping to any genomic location and the number of  
1031 reads mapping to concatemeric junctions are tabulated. Any barcodes that only differ  
1032 by a single basepair from a barcode with 100 times more reads are removed as likely  
1033 sequencing errors and reported as ‘off by one’ barcodes. Any barcode for which there  
1034 are more than 7 times as many ‘past end’ reads as reads mapping to genomic locations  
1035 as ‘past-end’ barcodes. The past-end barcodes are further characterized as ‘head-to-  
1036 tail’ concatemers (majority of Tnseq reads map to the left border T-DNA sequence),  
1037 ‘head-to-head’ concatemers (majority of the reads map to the right border T-DNA  
1038 sequence), or ‘Runon’ insertions (majority of reads map to pGI2 outside the T-DNA  
1039 sequence). Any barcodes for which the majority of TnSeq reads map ambiguously to  
1040 the genome are removed and reported as ambiguous barcodes. Any barcodes for  
1041 which 20% or more of the TnSeq reads map to a different location than the most  
1042 commonly observed location are removed and reported as ‘multilocus’ barcodes.  
1043 Finally, any barcodes mapped within 10 bases of a more abundant barcode for which  
1044 there is a Levenshtein edit distance (55) less than 5 are removed as likely sequencing  
1045 errors and reported as ‘off by two’ barcodes. The remaining unfiltered barcodes are  
1046 reported as the mutant pool.

1047  
1048 InsertionLocationJGI.py is a custom script to match the genomic locations of barcodes  
1049 in the mutant pool to the nearest gene in the current JGI *R. toruloides* gene catalog and  
1050 report whether the insertion is in a 5-prime intergenic region, a 5-prime UTR, an exon,  
1051 an intron, a 3-prime UTR, or a 3-prime intergenic region of that gene.

1052  
1053 InsertBias.py is a custom script to analyze potential biases in T-DNA insertion rates.  
1054 The script tracks number of insertions versus scaffold length for all scaffolds in the  
1055 genome, GC content in the local regions of insertion, and insertion rates in promoter  
1056 regions, 5-prime untranslated mRNA, exons, introns, 3-prime untranslated mRNA, and

1057 terminator regions. To assess fine-scale biases in insertion locations, all locations in  
1058 the genome are apportioned to one of the above feature types, then for each feature  
1059 type, the same number of insertions as were observed for that feature type in the  
1060 mutant pool are sampled at random (without replacement) from all the genomic  
1061 locations assigned to that feature type.

1062

### 1063 **Barcode sequencing**

1064 We isolated genomic DNA with the Zymo Research Fungal/Bacterial DNA MiniPrep kit  
1065 (D6005). We used Q5 high-fidelity polymerase with GC-enhancer (New England  
1066 Biolabs M0491S) to amplify unique barcode sequences flanked by specific priming  
1067 sites, yielding a 185 bp Illumina-sequencing-ready product (Figure 1 – figure  
1068 supplement 1). We used BarSeq primers from Wetmore et al. (175) (Supplementary file  
1069 4), except we replaced primer P1 with a mix of primers with 4-6 random bases to  
1070 improve nucleotide balance for optimal sequencing of low-diversity sequences (174).  
1071 We cleaned PCR products with the Zymo Research DNA clean and concentrator kit  
1072 (D4014). We quantified product yield with a Qubit 3.0 fluorometer system and mixed as  
1073 appropriate for sequencing as multiplexed libraries. We sequenced libraries on an  
1074 Illumina HiSeq 4000 system at the UC Berkeley Vincent J. Coates Genomics  
1075 Sequencing Laboratory. Libraries were purified with a Pippin Prep system (Sage  
1076 Biosciences) and loaded with 20% PhiX DNA as a phasing control for low diversity  
1077 samples (174). We sequenced each biological replicate to a depth of at least 20 million  
1078 reads. We counted occurrences of T-DNA barcodes in each sample with the script  
1079 MultiCodes\_Variable\_Length.pl, a modified version of MultiCodes.pl from Wetmore et  
1080 al. (38) that allows for barcodes of 17 – 23 basepairs.

1081

### 1082 **Fitness analysis**

1083 For all BarSeq experiments, we thawed frozen aliquots of the mutant pool on ice and  
1084 inoculated them into YPD at OD 0.2. Cultures were recovered approximately 12 hours  
1085 until OD 600 was approximately 0.8. Cultures were pelleted at 3000 RCF for 5 min,  
1086 washed twice in the appropriate media, and transferred to the condition of interest.  
1087 Samples were taken from the YPD starter cultures ( $T_0$ ) and after 5-7 doublings in the  
1088 experimental condition ( $T_{\text{condition}}$ ). Average fitness scores and T-like statistics (T-stats)  
1089 as metrics for consistency between individual insertion mutants in each gene were  
1090 calculated with Wetmore et al's software (176) (combineBarSeq.pl and FEBA.R).  
1091 Because that software does not consider biological replication between independent  
1092 cultures, we then averaged fitness scores for each condition and combined T-stats  
1093 across replicates with the script AverageReplicates.py, treating them as true T-statistics.  
1094 That is:  $T_{\text{condition}} = \text{Sum}(T_{\text{replicates}}) / \text{Sqrt}(N_{\text{replicates}})$ . T-stats computed in this way give a  
1095 measure of significance for observed fitness for each gene with respect the total  
1096 population in that condition. To assess significance of differences in observed fitness  
1097 between growth conditions we computed  $T_{c1-c2} = (F_{c1} - F_{c2}) / \text{Sqrt}((F_{c1}/T_{c1})^2 + (F_{c2}/$   
1098  $T_{c2})^2)$  with the script ResultsSummary.py. For experiments performed simultaneously  
1099 with explicitly paired samples (e.g. biological replicates in two or more conditions that  
1100 originated from the same  $T_0$  sample), we also computed an alternative statistical test,

1101 the Wilcoxon signed rank test (177, 178) with custom software (Wilcoxon.py). Briefly,  
1102 this program takes the raw counts for each barcode in an experiment, normalizes them  
1103 by sequencing depth per sample, then groups barcodes disrupting the same gene and  
1104 performs the Wilcoxon signed rank test on the difference between normalized counts for  
1105 all barcodes in the paired samples. For consistency with Wetmore et al.'s (179)  
1106 algorithms, we only included data from barcodes disrupting the central 80% of the  
1107 coding region and with at least 3 counts in one condition in the signed rank tests. We  
1108 generated K-means clusters of fitness scores using Pearson correlation as the similarity  
1109 metric using Cluster 3.0 (53). For comparing enrichment in density and FACS separated  
1110 fractions we computed F and T for each fraction versus the T<sub>0</sub> control. The enrichment  
1111 score E and T between fractions was then calculated as  $E = F_{\text{high lipid}} - F_{\text{low lipid}}$  and  $T_{\text{high}}$   
1112  $\text{lipid} - \text{low lipid} = (F_{\text{high lipid}} - F_{\text{low lipid}}) / \text{Sqrt} ((F_{\text{high lipid}} / T_{\text{high lipid}})^2 + (F_{\text{low lipid}} / T_{\text{low lipid}})^2)$  with the  
1113 script ResultsSummary.py. We generated hierarchical clusters of enrichment scores  
1114 using Pearson correlation as the similarity metric and average linkage as the clustering  
1115 method. All fitness data are available in Supplementary file 2 and the fitness browser  
1116 ((180)). Custom Python scripts are available at ((180)). Sequence data have been  
1117 submitted to the NCBI Short Read Archive (SRP116193)

1118

### 1119 **Transformation of *R. toruloides* by electroporation**

1120 We cultured *R. toruloides* overnight in 10 mL YPD on a roller drum to an OD 600 of 2,  
1121 then pelleted cells at 3000 RCF, 5 min at 4 °C in a benchtop centrifuge (Eppendorf 5810  
1122 R). Cells were kept at 4 °C from this point. We transferred the pellets to 1.5 mL tubes  
1123 and washed them 4 times with ice cold 0.75 M D-sorbitol (Sigma S1876), centrifuging  
1124 each wash 30 seconds at 8000 RCF, 4 °C (Eppendorf 5424). After the final wash, we  
1125 removed excess D-sorbitol and added 35 µl of cell pellet to 10 µl of fresh 0.75 M D-  
1126 sorbitol and ~1 µg of PCR product in 5 µl water in a chilled 0.1 cm cuvette. We  
1127 electroporated cells at 1500 kV, 200 ohms and 25 µF with a ECM 630 (BTX)  
1128 electroporation system. We then added 1 mL cold 1:1 mixture of YPD and 0.75 M D-  
1129 sorbitol and transferred to 14 mL round bottom culture tubes for a 3-hour recovery  
1130 culture at 30C with shaking at 200 rpm on a platform shaker. We then pelleted the  
1131 cultures at 8000 RCF, 30 seconds, suspended in 200 µl YPD and plated on YPD with  
1132 100 µg/mL nourseothricin (clonNAT, Werner Bioagents).

1133

### 1134 **Gene ontology enrichment**

1135 We scored enrichment of gene ontology terms with a custom script that performs a  
1136 hypergeometric test on the frequency of each term in the genome versus the frequency  
1137 in given gene set (script GOenrich.py, available at (181)). We corrected for multiple  
1138 hypothesis testing with the Benjamini-Hochberg correction (176). We extended the GO  
1139 terms associated with *R. toruloides* genes in the current JGI annotation by collecting  
1140 terms for orthologous genes in *Arabidopsis thaliana*, *Aspergillus nidulans*,  
1141 *Caenorhabditis elegans*, *Candida albicans*, *Homo sapiens*, *Mus musculus*, and  
1142 *Saccharomyces cerevisiae*, obtained from the Gene Ontology Consortium (177, 178).

1143

#### 1144 **Total fatty acid quantification with gas chromatography**

1145 Cell lysis, extraction of total lipids, and conversion to fatty acid methyl esters (FAMES)  
1146 was based on a published protocol (179). We cultured IFO 0880, a selection of seven  
1147 targeted deletion strains (see Supplementary file 6) and one overexpression strain  
1148 (RT880-AD, (53)) in low nitrogen medium for 48 or 96 hours. We collected paired 5 mL  
1149 samples from each in screw-top glass tubes (Corning 99502-10) and 15 mL  
1150 polyethylene tubes (Corning 352096) for lipid extraction and mass determination,  
1151 respectively. We pelleted samples by centrifugation at 2000 RCF, 4 °C for 20 minutes,  
1152 and washed once in water to remove salts and unused glucose. We then transferred the  
1153 mass determination sample to a pre-tared 1.5 mL microcentrifuge tube. We froze both  
1154 samples at -20 °C overnight, then lyophilized them 48 hours in a FreeZone freeze dry  
1155 system (Labconco 7754042) before weighing/extraction. We added 1 mL methanol  
1156 spiked with 250 µg methyl tridecanoate to each sample to serve as an internal standard  
1157 (ISTD). We then resuspended lipid extraction samples (usually about 10-20 mg) by  
1158 vortexing in 3 mL 3N methanolic HCL (SUPELCO 33050) and 200 µl chloroform (Sigma  
1159 472476) and incubated at 80 °C water bath for 1 hour. Cell lysis and conversion to  
1160 FAMES occurs during this incubation. To extract FAMES we then added 2 mL hexane  
1161 (Sigma 650552) and vortexed samples well before centrifugation at 3000 RCF for 3  
1162 minutes. One µL of the hexane layer was injected in split mode (1:10) onto a SP2330  
1163 capillary column (30 m x 0.25 mm x 0.2 µm, Supelco). An Agilent 7890A gas  
1164 chromatograph equipped with a flame ionization detector (FID) was used for analysis  
1165 with the following settings: Injector temperature 250 °C, carrier gas: helium at 1 mL/min,  
1166 temperature program: 140 °C, 3 min isocratic, 10 °C/min to 220 °C, 40 °C/min to 240  
1167 °C, 5 min isocratic. FAME concentrations were calculated by comparing the peak areas  
1168 in the samples to the peak areas of ten commercially available high-purity standards  
1169 (C16:0, C16:1, C17:0, C18:0, C18:1, C18:2, C20:0, C20:1, C22:0, C24:0) (Sigma) in  
1170 known concentration relative to the internal standard, respectively.

1171

#### 1172 **Relative TAG measurement with BODIPY and flow cytometry**

1173 We inoculated deletion mutants and the *YKU70Δ* parental strain at OD 0.1 in low  
1174 nitrogen medium and cultured for 40 hours. We fixed samples by adding 180 µl cell  
1175 culture to 20 µl 37% formaldehyde (Electron Microscopy Sciences) and incubating for  
1176 15 minutes at room temperature. We then diluted fixed cells 1:100 in 200 µl PBS (from  
1177 10X concentrate, Gibco 70011-44) with 0.5 M KI and 0.25 µg/mL BODIPY 493/503 (Life  
1178 Technologies D-3922), then incubated 30 minutes at room temperature. We quantified  
1179 BODIPY signal for 10,000 cells per sample on a Guava HT easyCyte system (EMD  
1180 Millipore) in the green channel (excitation 488 nm, emission 525 nm) using InCyte  
1181 software (Millipore).

1182

#### 1183 **Population enrichment with FACS**

1184 We cultured the barcoded mutant pool in low nitrogen medium for 40 hours. We then  
1185 diluted unfixed cells 1:100 in 10 ml PBS with 0.5 M KI and 0.25 µg/mL BODIPY  
1186 493/503, then incubated 30 minutes at 30 °C with shaking. We then sorted the  
1187 population on a Sony SH800 cell sorter with a 70 µM fluidic chip, sorting in semi-purity

1188 mode. We first applied a gate for single cell events with forward scatter height within  
1189 15% of forward scatter area. We sorted a sample of 10 million cells with the scattering  
1190 gate alone as a control population, to account for effects of growth, sorting, and  
1191 collection that are independent of lipid accumulation. Then we collected the 10% of the  
1192 size-filtered population with the highest and lowest signals in the FITC channel. We  
1193 collected 10 million cells each for the high and low signal populations. We collected all  
1194 sorted cells in YPD with 300  $\mu\text{g/ml}$  cefotaxime (Sigma C7039) and 300  $\mu\text{g/ml}$   
1195 carbenicillin (Sigma C1389), then grew them to saturation in our standard culture  
1196 conditions and pelleted 1 mL sample, and then stored at  $-20\text{ }^{\circ}\text{C}$  for BarSeq analysis.  
1197

### 1198 **Population enrichment with sucrose density gradients**

1199 We prepared linear sucrose gradients with the method of Luthe et al (180). For  
1200 example, to prepare a 65%-35% sucrose gradient; we prepared four solutions of  
1201 sucrose (Sigma G7528) at 65, 55, 35, and 35 grams per 100 mL in PBS, then  
1202 successively froze 10 mL layers of each concentration in a 50 mL conical tube (Corning  
1203 430829) on dry ice and stored the gradient at  $-20\text{ }^{\circ}\text{C}$ . We selected appropriate gradients  
1204 to maximize the physical separation of the cell population by running trial experiments  
1205 with wild type IFO 0880 cultures on a number of sucrose gradients. The gradients used  
1206 in each experiment are described in Figure 4 – figure supplement 2. Approximately 24  
1207 hours before performing density separation on cell population, the appropriate step  
1208 gradient was moved to  $4\text{ }^{\circ}\text{C}$  to thaw, yielding a linear gradient (180).  
1209

1210 To perform the separation, we centrifuged 50 mL of culture at 6,000 RCF at  $4\text{ }^{\circ}\text{C}$  for 20  
1211 min. We then suspended the pellet in 5 ml PBS at  $4\text{ }^{\circ}\text{C}$  and carefully loaded it onto a  
1212 sucrose gradient. We centrifuged the gradients for 1 hour at 5,000 RCF at  $4\text{ }^{\circ}\text{C}$  with  
1213 slow acceleration and no brake for deceleration in a Beckman Coulter Avanti J26 XP  
1214 centrifuge with a JS5.3 swinging bucket rotor. To collect fractions, we pierced the  
1215 bottom of each tube with the tip of needle (BD PrecisionGlide 16G, 305197), to slowly  
1216 drain the gradient from the bottom, at 1 drop every 1-5 seconds. We collected 2 mL  
1217 fractions, estimated average fraction density by weighing a 100  $\mu\text{l}$  sample (Figure 4 –  
1218 figure supplement 2) and measured the distribution of the cell population across the  
1219 sample by optical density (Figure 4 – figure supplement 1D). The appropriate fractions  
1220 were then combined to sample the least buoyant (highest density) 5-10%, median  
1221 buoyancy 30-50%, and most buoyant (lowest density) 5-10% of the population. For  
1222 each biological replicate, we also collected a 1 mL sample from culture before  
1223 separation to monitor growth in the experimental condition.  
1224

### 1225 **Microscopy**

1226 Cover slips were submerged in 0.1% v/v polylysine (Sigma P8920) for 15  
1227 minutes. Cover slips were removed from polylysine and blotted dry from the bottom of  
1228 vertically-held slips. Slips were then washed several times with ddH<sub>2</sub>O and rapidly dried  
1229 with compressed air. Directly prior to imaging, slips are visually inspected for streaks  
1230 and dust and softly cleaned with lens paper. Cells were grown 40 hours in low nitrogen  
1231 medium 1 mL of culture was transferred to 2 mL microcentrifuge tubes with 1 mL of PBS

1232 and tubes were mixed briefly by vortexing. Cells were pelleted at 9000 RCF for 1  
1233 minute in a microcentrifuge, aspirated and suspended in 100  $\mu$ l of fluorescent staining  
1234 solution (PBS with 0.5 M KI and 0.25  $\mu$ g/mL BODIPY 493/503) to visualize  
1235 intracellular lipid droplets. Four  $\mu$ l of stained cells were pipetted up and down and  
1236 transferred to the clean slides. Polylysine-coated cover slips were carefully placed on 4  
1237  $\mu$ l drop to ensure even spreading of liquid. Cells were observed on an Axio Observer  
1238 microscope (Zeiss) with a plan-apochromat 100x DIC objective (Zeiss 440782-9902-  
1239 000), ORCA-Flash 4.0 camera (Hamamatsu C11440-22CU), and ZenPro 2012 (blue  
1240 edition) software. For BODIPY imaging cells were illuminated with an X-cite Series 120  
1241 arc-lamp (EXFO Photonics Solutions) and 38HE filter set, 450-490 excitation, 500-550  
1242 emission (Zeiss 489038-9901-000). Zvi files were converted to 16 bit TIFF images and  
1243 representative fields of view were cropped and channels merged using FIJI image  
1244 processing software (181).  
1245

1246

## 1247 **References**

- 1248 1. Wang QM, et al. (2015) Phylogenetic classification of yeasts and related taxa  
1249 within *Pucciniomycotina*. *Studies in Mycology* 81:149–189.
- 1250 2. Péter G, Rosa C eds. (2006) *Biodiversity and Ecophysiology of Yeasts*  
1251 (Springer-Verlag, Berlin/Heidelberg) doi:10.1007/3-540-30985-3.
- 1252 3. Sláviková E, Vadkertiová R, Vránová D (2009) Yeasts colonizing the leaves of  
1253 fruit trees. *Ann Microbiol* 59(3):419–424.
- 1254 4. Butinar L, Santos S, Spencer-Martins I, Oren A, Gunde-Cimerman N (2005)  
1255 Yeast diversity in hypersaline habitats. *FEMS Microbiol Lett* 244(2):229–234.
- 1256 5. Pulschen AA, et al. (2015) UV-resistant yeasts isolated from a high-altitude  
1257 volcanic area on the Atacama Desert as eukaryotic models for astrobiology.  
1258 *MicrobiologyOpen* 4(4):574–588.
- 1259 6. Mata-Gómez LC, Montañez JC, Méndez-Zavala A, Aguilar CN (2014)  
1260 Biotechnological production of carotenoids by yeasts: an overview. *Microb Cell*  
1261 *Fact* 13:12.
- 1262 7. Lee JLL, Chen L, Shi J, Trzcinski A, Chen WN (2014) Metabolomic Profiling of  
1263 *Rhodospiridium toruloides* Grown on Glycerol for Carotenoid Production during  
1264 Different Growth Phases. *J Agric Food Chem* 62(41):10203–10209.
- 1265 8. Zhu Z, et al. (2012) A multi-omic map of the lipid-producing yeast  
1266 *Rhodospiridium toruloides*. *Nat Commun* 3:1112.
- 1267 9. Wu S, Zhao X, Shen H, Wang Q, Zhao ZK (2011) Microbial lipid production by  
1268 *Rhodospiridium toruloides* under sulfate-limited conditions. *Bioresour Technol*  
1269 102(2):1803–1807.
- 1270 10. Wu S, Hu C, Jin G, Zhao X, Zhao ZK (2010) Phosphate-limitation mediated lipid  
1271 production by *Rhodospiridium toruloides*. *Bioresour Technol* 101(15):6124–  
1272 6129.
- 1273 11. Wiebe MG, Koivuranta K, Penttilä M, Ruohonen L (2012) Lipid production in  
1274 batch and fed-batch cultures of *Rhodospiridium toruloides* from 5 and 6 carbon  
1275 carbohydrates. *BMC Biotechnol* 12(1):26–10.
- 1276 12. Walther TC, Farese RV (2012) Lipid droplets and cellular lipid metabolism. *Annu*  
1277 *Rev Biochem* 81(1):687–714.
- 1278 13. Farese RV, Walther TC (2009) Lipid droplets finally get a little R-E-S-P-E-C-T.  
1279 *Cell* 139(5):855–860.



- 1280 14. Gao Q, Goodman JM (2015) The lipid droplet-a well-connected organelle. *Front*  
1281 *Cell Dev Biol* 3:49.
- 1282 15. Krahmer N, Farese RV, Walther TC (2013) Balancing the fat: lipid droplets and  
1283 human disease. *EMBO Molecular Medicine* 5(7):973–983.
- 1284 16. Welte MA (2015) Expanding Roles for Lipid Droplets. *Current Biology*  
1285 25(11):R470–R481.
- 1286 17. Shpilka T, et al. (2015) Lipid droplets and their component triglycerides and  
1287 steryl esters regulate autophagosome biogenesis. *EMBO J* 34(16):2117–2131.
- 1288 18. Yang P-L, Hsu T-H, Wang C-W, Chen R-H (2016) Lipid droplets maintain lipid  
1289 homeostasis during anaphase for efficient cell separation in budding yeast. *Mol*  
1290 *Biol Cell* 27(15):2368–2380.
- 1291 19. Gocze PM, Freeman DA (1994) Factors underlying the variability of lipid droplet  
1292 fluorescence in MA-10 Leydig tumor cells. *Cytometry* 17(2):151–158.
- 1293 20. Herms A, et al. (2013) Cell-to-cell heterogeneity in lipid droplets suggests a  
1294 mechanism to reduce lipotoxicity. *Curr Biol* 23(15):1489–1496.
- 1295 21. Huang X-F, et al. (2016) Culture strategies for lipid production using acetic acid  
1296 as sole carbon source by *Rhodospiridium toruloides*. *Bioresour Technol*  
1297 206:141–149.
- 1298 22. Fei Q, et al. (2016) Enhanced lipid production by *Rhodospiridium toruloides*  
1299 using different fed-batch feeding strategies with lignocellulosic hydrolysate as  
1300 the sole carbon source. *Biotechnol Biofuels* 9:130.
- 1301 23. Singh G, et al. (2016) Concomitant Production of Lipids and Carotenoids in  
1302 *Rhodospiridium toruloides* under Osmotic Stress Using Response Surface  
1303 Methodology. *Front Microbiol* 7:1219–13.
- 1304 24. Hu C, Zhao X, Zhao J, Wu S, Zhao ZK (2009) Effects of biomass hydrolysis by-  
1305 products on oleaginous yeast *Rhodospiridium toruloides*. *Bioresour Technol*  
1306 100(20):4843–4847.
- 1307 25. Kitahara Y, et al. (2014) Isolation of oleaginous yeast (*Rhodospiridium*  
1308 *toruloides*) mutants tolerant of sugarcane bagasse hydrolysate. *Biosci*  
1309 *Biotechnol Biochem* 78(2):336–342.
- 1310 26. Lee JJJ, Chen L, Bin Cao, Chen WN (2016) Engineering *Rhodospiridium*  
1311 *toruloides* with a membrane transporter facilitates production and separation of  
1312 carotenoids and lipids in a bi-phasic culture. *Appl Microbiol Biotechnol*  
1313 100(2):869–877.

- 1314 27. Zhang S, Ito M, Skerker JM, Arkin AP, Rao CV (2016) Metabolic engineering of  
1315 the oleaginous yeast *Rhodospiridium toruloides* IFO0880 for lipid  
1316 overproduction during high-density fermentation. *Appl Microbiol Biotechnol*  
1317 100(21):9393–9405.
- 1318 28. Fillet S, et al. (2015) Fatty alcohols production by oleaginous yeast. *J Ind*  
1319 *Microbiol Biotechnol* 42(11):1463–1472.
- 1320 29. Wynn JP, bin Abdul Hamid A, Ratledge C (1999) The role of malic enzyme in  
1321 the regulation of lipid accumulation in filamentous fungi. *Microbiology*  
1322 145(8):1911–1917.
- 1323 30. Zhu Z, et al. (2015) Dynamics of the lipid droplet proteome of the Oleaginous  
1324 yeast *Rhodospiridium toruloides*. *Eukaryotic Cell* 14(3):252–264.
- 1325 31. Bickel PE, Tansey JT, Welte MA (2009) PAT proteins, an ancient family of lipid  
1326 droplet proteins that regulate cellular lipid stores. *Biochim Biophys Acta*  
1327 1791(6):419–440.
- 1328 32. Smith JJ, et al. (2006) Expression and functional profiling reveal distinct gene  
1329 classes involved in fatty acid metabolism. *Mol Syst Biol* 2(1):2006.0009.
- 1330 33. Birrell GW, et al. (2002) Transcriptional response of *Saccharomyces cerevisiae*  
1331 to DNA-damaging agents does not identify the genes that protect against these  
1332 agents. *PNAS* 99(13):8778–8783.
- 1333 34. Price MN, et al. (2013) Indirect and suboptimal control of gene expression is  
1334 widespread in bacteria. *Mol Syst Biol* 9(1):660–660.
- 1335 35. Cermelli S, Guo Y, Gross SP, Welte MA (2006) The Lipid-Droplet Proteome  
1336 Reveals that Droplets Are a Protein-Storage Depot. *Current Biology*  
1337 16(18):1783–1795.
- 1338 36. Grigoriev IV, et al. (2014) MycoCosm portal: gearing up for 1000 fungal  
1339 genomes. *Nucleic Acids Res* 42(Database issue):D699–704.
- 1340 37. Langridge GC, et al. (2009) Simultaneous assay of every *Salmonella typhi* gene  
1341 using one million transposon mutants. *Genome Research* 19(12):2308–2316.
- 1342 38. Wetmore KM, et al. (2015) Rapid quantification of mutant fitness in diverse  
1343 bacteria by sequencing randomly bar-coded transposons. *MBio* 6(3):e00306–15.
- 1344 39. Smith AM, et al. (2009) Quantitative phenotyping via deep barcode sequencing.  
1345 *Genome Research* 19(10):1836–1842.
- 1346 40. Hillenmeyer ME, et al. (2010) Systematic analysis of genome-wide fitness data  
1347 in yeast reveals novel gene function and drug action. *Genome Biol* 11(3):R30.

- 1348 41. Huang B, Lu J, Byström AS (2008) A genome-wide screen identifies genes  
1349 required for formation of the wobble nucleoside 5-methoxycarbonylmethyl-2-  
1350 thiouridine in *Saccharomyces cerevisiae*. *RNA* 14(10):2183–2194.
- 1351 42. Chaillot J, Cook MA, Corbeil J, Sellam A (2017) Genome-wide screen for  
1352 haploinsufficient cell size genes in the opportunistic yeast *Candida albicans*. *G3*  
1353 (*Bethesda*) 7(2):355–360.
- 1354 43. Oh J, et al. (2010) Gene annotation and drug target discovery in *Candida*  
1355 *albicans* with a tagged transposon mutant collection. *PLoS Pathog* 6(10).  
1356 doi:10.1371/journal.ppat.1001140.
- 1357 44. Sliva A, Kuang Z, Meluh PB, Boeke JD (2016) Barcode Sequencing Screen  
1358 Identifies SUB1 as a Regulator of Yeast Pheromone Inducible Genes. *G3*  
1359 (*Bethesda*) 6(4):881–892.
- 1360 45. Giaever G, et al. (2002) Functional profiling of the *Saccharomyces cerevisiae*  
1361 genome. *Nature* 418(6896):387–391.
- 1362 46. Gelvin SB (2003) *Agrobacterium*-Mediated Plant Transformation: the Biology  
1363 behind the “Gene-Jockeying” Tool. *Microbiol Mol Biol Rev* 67(1):16–37.
- 1364 47. Bundock P, van Attikum H, Dulk Ras den A, Hooykaas PJJ (2002) Insertional  
1365 mutagenesis in yeasts using T-DNA from *Agrobacterium tumefaciens*. *Yeast*  
1366 19(6):529–536.
- 1367 48. Kunitake E, Tani S, Sumitani J-I, Kawaguchi T (2011) *Agrobacterium*  
1368 *tumefaciens*-mediated transformation of *Aspergillus aculeatus* for insertional  
1369 mutagenesis. *AMB Express* 1(1):46.
- 1370 49. Walton FJ, Idnurm A, Heitman J (2005) Novel gene functions required for  
1371 melanization of the human pathogen *Cryptococcus neoformans*. *Molecular*  
1372 *Microbiology* 57(5):1381–1396.
- 1373 50. Sullivan TD, Rooney PJ, Klein BS (2002) *Agrobacterium tumefaciens* integrates  
1374 transfer DNA into single chromosomal sites of dimorphic fungi and yields  
1375 homokaryotic progeny from multinucleate yeast. *Eukaryotic Cell* 1(6):895–905.
- 1376 51. Blaise F, et al. (2007) A critical assessment of *Agrobacterium tumefaciens*-  
1377 mediated transformation as a tool for pathogenicity gene discovery in the  
1378 phytopathogenic fungus *Leptosphaeria maculans*. *Fungal Genet Biol* 44(2):123–  
1379 138.
- 1380 52. Esher SK, Granek JA, Alspaugh JA (2015) Rapid mapping of insertional  
1381 mutations to probe cell wall regulation in *Cryptococcus neoformans*. *Fungal*  
1382 *Genet Biol* 82:9–21.

- 1383 53. Zhang S, et al. (2016) Engineering *Rhodospiridium toruloides* for increased lipid  
1384 production. *Biotechnol Bioeng* 113(5):1056–1066.
- 1385 54. Engler C, Kandzia R, Marillonnet S (2008) A one pot, one step, precision cloning  
1386 method with high throughput capability. *PLOS ONE* 3(11).  
1387 doi:10.1371/journal.pone.0003647.
- 1388 55. Wetmore KM, et al. (2015) Rapid Quantification of Mutant Fitness in Diverse  
1389 Bacteria by Sequencing Randomly Bar-Coded Transposons. *MBio* 6(3):e00306–  
1390 15.
- 1391 56. Arnaud MB, et al. (2012) The *Aspergillus* Genome Database (AspGD): recent  
1392 developments in comprehensive multispecies curation, comparative genomics  
1393 and community resources. *Nucleic Acids Res* 40(Database issue):D653–9.
- 1394 57. Ianiri G, Idnurm A (2015) Essential gene discovery in the basidiomycete  
1395 *Cryptococcus neoformans* for antifungal drug target prioritization. *MBio*  
1396 6(2):e02334–14.
- 1397 58. Cherry JM, et al. (2012) *Saccharomyces* Genome Database: the genomics  
1398 resource of budding yeast. *Nucleic Acids Res* 40(Database issue):D700–5.
- 1399 59. Wood V, et al. (2012) PomBase: a comprehensive online resource for fission  
1400 yeast. *Nucleic Acids Res* 40(Database issue):D695–9.
- 1401 60. Colot HV, et al. (2006) A high-throughput gene knockout procedure for  
1402 *Neurospora* reveals functions for multiple transcription factors. *Proc Natl Acad*  
1403 *Sci USA* 103(27):10352–10357.
- 1404 61. Price MN, et al. (2016) Deep Annotation of Protein Function across Diverse  
1405 Bacteria from Mutant Phenotypes. *bioRxiv*:072470.
- 1406 62. WILCOXON F (1946) Individual comparisons of grouped data by ranking  
1407 methods. *J Econ Entomol* 39:269.
- 1408 63. Kohlwein SD, Veenhuis M, van der Klei IJ (2012) Lipid Droplets and  
1409 Peroxisomes: Key Players in Cellular Lipid Homeostasis or A Matter of Fat-  
1410 Store “em Up or Burn ”em Down. *Genetics* 193(1):1–50.
- 1411 64. Rambold AS, Cohen S, Lippincott-Schwartz J (2015) Fatty acid trafficking in  
1412 starved cells: regulation by lipid droplet lipolysis, autophagy, and mitochondrial  
1413 fusion dynamics. *Dev Cell* 32(6):678–692.
- 1414 65. Houten SM, Violante S, Ventura FV, Wanders RJA (2016) The Biochemistry and  
1415 Physiology of Mitochondrial Fatty Acid  $\beta$ -Oxidation and Its Genetic Disorders.  
1416 <http://dxdoi.org/101146/annurev-physiol-021115-105045> 78(1):23–44.

- 1417 66. Waterham HR, Ferdinandusse S, Wanders RJA (2016) Human disorders of  
1418 peroxisome metabolism and biogenesis. *Biochimica et Biophysica Acta (BBA) -*  
1419 *Molecular Cell Research* 1863(5):922–933.
- 1420 67. Dulermo T, Nicaud J-M (2011) Involvement of the G3P shuttle and  $\beta$ -oxidation  
1421 pathway in the control of TAG synthesis and lipid accumulation in *Yarrowia*  
1422 *lipolytica*. *Metab Eng* 13(5):482–491.
- 1423 68. Beopoulos A, et al. (2014) Metabolic engineering for ricinoleic acid production in  
1424 the oleaginous yeast *Yarrowia lipolytica*. *Appl Microbiol Biotechnol* 98(1):251–  
1425 262.
- 1426 69. Camões F, et al. (2015) New insights into the peroxisomal protein inventory:  
1427 Acyl-CoA oxidases and -dehydrogenases are an ancient feature of peroxisomes.  
1428 *Biochimica et Biophysica Acta (BBA) - Molecular Cell Research* 1853(1):111–  
1429 125.
- 1430 70. Ninomiya Y, Suzuki K, Ishii C, Inoue H (2004) Highly efficient gene  
1431 replacements in *Neurospora* strains deficient for nonhomologous end-joining.  
1432 *Proc Natl Acad Sci USA* 101(33):12248–12253.
- 1433 71. Eroglu E, Melis A (2009) “Density equilibrium” method for the quantitative and  
1434 rapid in situ determination of lipid, hydrocarbon, or biopolymer content in  
1435 microorganisms. *Biotechnol Bioeng* 102(5):1406–1415.
- 1436 72. Kamisaka Y, et al. (2006) Identification of genes affecting lipid content using  
1437 transposon mutagenesis in *Saccharomyces cerevisiae*. *Biosci Biotechnol*  
1438 *Biochem* 70(3):646–653.
- 1439 73. Liu L, Pan A, Spofford C, Zhou N, Alper HS (2015) An evolutionary metabolic  
1440 engineering approach for enhancing lipogenesis in *Yarrowia lipolytica*. *Metab*  
1441 *Eng* 29:36–45.
- 1442 74. Novick P, Field C, Schekman R (1980) Identification of 23 complementation  
1443 groups required for post-translational events in the yeast secretory pathway. *Cell*  
1444 21(1):205–215.
- 1445 75. Bryan AK, Goranov A, Amon A, Manalis SR (2010) Measurement of mass,  
1446 density, and volume during the cell cycle of yeast. *Proc Natl Acad Sci USA*  
1447 107(3):999–1004.
- 1448 76. Roberts RL, Mösch HU, Fink GR (1997) 14-3-3 proteins are essential for  
1449 RAS/MAPK cascade signaling during pseudohyphal development in *S.*  
1450 *cerevisiae*. *Cell* 89(7):1055–1065.
- 1451 77. Gelperin D, et al. (1995) 14-3-3 proteins: potential roles in vesicular transport

- 1452 and Ras signaling in *Saccharomyces cerevisiae*. *Proc Natl Acad Sci USA*  
1453 92(25):11539–11543.
- 1454 78. Das B, Guo Z, Russo P, Chartrand P, Sherman F (2000) The role of nuclear cap  
1455 binding protein Cbc1p of yeast in mRNA termination and degradation. *Mol Cell*  
1456 *Biol* 20(8):2827–2838.
- 1457 79. Beller M, et al. (2008) COPI complex is a regulator of lipid homeostasis. *PLoS*  
1458 *Biol* 6(11). doi:10.1371/journal.pbio.0060292.
- 1459 80. Zappa F, Venditti R, De Matteis MA (2017) TRAPPING Rab18 in lipid droplets.  
1460 *EMBO J* 36(4):e201696287.
- 1461 81. Terashima M, Freeman ES, Jinkerson RE, Jonikas MC (2015) A fluorescence-  
1462 activated cell sorting-based strategy for rapid isolation of high-lipid  
1463 *Chlamydomonas* mutants. *The Plant Journal* 81(1):147–159.
- 1464 82. Damon JR, Pincus D, Ploegh HL (2015) tRNA thiolation links translation to  
1465 stress responses in *Saccharomyces cerevisiae*. *Mol Biol Cell* 26(2):270–282.
- 1466 83. Laxman S, et al. (2013) Sulfur amino acids regulate translational capacity and  
1467 metabolic homeostasis through modulation of tRNA thiolation. *Cell* 154(2):416–  
1468 429.
- 1469 84. Qiao K, et al. (2015) Engineering lipid overproduction in the oleaginous yeast  
1470 *Yarrowia lipolytica*. *Metab Eng* 29:56–65.
- 1471 85. Overkamp KM, et al. (2000) In vivo analysis of the mechanisms for oxidation of  
1472 cytosolic NADH by *Saccharomyces cerevisiae* mitochondria. *J Bacteriol*  
1473 182(10):2823–2830.
- 1474 86. Pagac M, et al. (2016) SEIPIN Regulates Lipid Droplet Expansion and Adipocyte  
1475 Development by Modulating the Activity of Glycerol-3-phosphate  
1476 Acyltransferase. *Cell Rep* 17(6):1546–1559.
- 1477 87. Sorger D, Daum G (2002) Synthesis of triacylglycerols by the acyl-coenzyme  
1478 A:diacyl-glycerol acyltransferase Dga1p in lipid particles of the yeast  
1479 *Saccharomyces cerevisiae*. *J Bacteriol* 184(2):519–524.
- 1480 88. De Virgilio C, et al. (1992) Cloning and disruption of a gene required for growth  
1481 on acetate but not on ethanol: the acetyl-coenzyme A synthetase gene of  
1482 *Saccharomyces cerevisiae*. *Yeast* 8(12):1043–1051.
- 1483 89. Shi F, Kawai S, Mori S, Kono E, Murata K (2005) Identification of ATP-NADH  
1484 kinase isozymes and their contribution to supply of NADP(H) in *Saccharomyces*  
1485 *cerevisiae*. *FEBS J* 272(13):3337–3349.

- 1486 90. Pålman I-L, et al. (2002) Kinetic regulation of the mitochondrial glycerol-3-  
1487 phosphate dehydrogenase by the external NADH dehydrogenase in  
1488 *Saccharomyces cerevisiae*. *Journal of Biological Chemistry* 277(31):27991–  
1489 27995.
- 1490 91. Athenstaedt K, et al. (2006) Lipid particle composition of the yeast *Yarrowia*  
1491 *lipolytica* depends on the carbon source. *Proteomics* 6(5):1450–1459.
- 1492 92. Grillitsch K, et al. (2011) Lipid particles/droplets of the yeast *Saccharomyces*  
1493 *cerevisiae* revisited: Lipidome meets Proteome. *Biochimica et Biophysica Acta*  
1494 *(BBA) - Molecular and Cell Biology of Lipids* 1811(12):1165–1176.
- 1495 93. Salo VT, et al. (2016) Seipin regulates ER-lipid droplet contacts and cargo  
1496 delivery. *EMBO J* 35(24):2699–2716.
- 1497 94. Fei W, et al. (2008) Fld1p, a functional homologue of human seipin, regulates  
1498 the size of lipid droplets in yeast. *J Cell Biol* 180(3):473–482.
- 1499 95. Wang H, et al. (2016) Seipin is required for converting nascent to mature lipid  
1500 droplets. *eLife* 5. doi:10.7554/eLife.16582.
- 1501 96. Szymanski KM, et al. (2007) The lipodystrophy protein seipin is found at  
1502 endoplasmic reticulum lipid droplet junctions and is important for droplet  
1503 morphology. *Proc Natl Acad Sci USA* 104(52):20890–20895.
- 1504 97. Guo Y, et al. (2008) Functional genomic screen reveals genes involved in lipid-  
1505 droplet formation and utilization. *Nature* 453(7195):657–661.
- 1506 98. Zehmer JK, et al. (2009) A role for lipid droplets in inter-membrane lipid traffic.  
1507 *Proteomics* 9(4):914–921.
- 1508 99. Ashrafi K, et al. (2003) Genome-wide RNAi analysis of *Caenorhabditis elegans*  
1509 fat regulatory genes. *Nature* 421(6920):268–272.
- 1510 100. Michielse CB, Hooykaas PJJ, van den Hondel CAMJJ, Ram AFJ (2005)  
1511 *Agrobacterium*-mediated transformation as a tool for functional genomics in  
1512 fungi. *Curr Genet* 48(1):1–17.
- 1513 101. Martínez-Cruz J, Romero D, de Vicente A, Pérez-García A (2017)  
1514 Transformation of the cucurbit powdery mildew pathogen *Podosphaera xanthii*  
1515 by *Agrobacterium tumefaciens*. *New Phytol* 213(4):1961–1973.
- 1516 102. Wu J, et al. (2016) Identification of *Conidiogenesis*-Associated Genes in  
1517 *Colletotrichum gloeosporioides* by *Agrobacterium tumefaciens*-Mediated  
1518 Transformation. *Curr Microbiol* 73(6):802–810.
- 1519 103. Zhang T, Ren P, Chaturvedi V, Chaturvedi S (2015) Development of an

- 1520 *Agrobacterium*-mediated transformation system for the cold-adapted fungi  
1521 *Pseudogymnoascus destructans* and *P. pannorum*. *Fungal Genet Biol* 81:73–  
1522 81.
- 1523 104. Liu L, et al. (2013) *Agrobacterium tumefaciens*-mediated genetic transformation  
1524 of the Taxol-producing endophytic fungus *Ozonium* sp EFY21. *Genet Mol Res*  
1525 12(3):2913–2922.
- 1526 105. Zhang JJ, et al. (2014) An efficient *Agrobacterium*-mediated transformation  
1527 method for the edible mushroom *Hypsizygus marmoreus*. *Microbiol Res* 169(9-  
1528 10):741–748.
- 1529 106. Li S, et al. (2013) *Agrobacterium tumefaciens*-mediated transformation of the  
1530 soybean pathogen *Phomopsis longicolla*. *J Microbiol Methods* 92(3):244–245.
- 1531 107. Han H, Xu X, Peng Y, Kong D, Li D (2012) *Agrobacterium tumefaciens*-mediated  
1532 transformation as a tool for insertional mutagenesis in thermophilic fungus  
1533 *Thermomyces lanuginosus*. *Wei Sheng Wu Xue Bao* 52(12):1449–1457.
- 1534 108. Muniz CR, et al. (2014) *Agrobacterium tumefaciens*-mediated transformation of  
1535 *Lasiodiplodia theobromae*, the causal agent of gummosis in cashew nut plants.  
1536 *Genet Mol Res* 13(2):2906–2913.
- 1537 109. Rodrigues MBC, et al. (2013) *Agrobacterium*-mediated transformation of  
1538 *Guignardia citricarpa*: an efficient tool to gene transfer and random mutagenesis.  
1539 *Fungal Biol* 117(7-8):556–568.
- 1540 110. Celis AM, et al. (2017) Highly efficient transformation system for *Malassezia*  
1541 *furfur* and *Malassezia pachydermatis* using *Agrobacterium tumefaciens*-  
1542 mediated transformation. *J Microbiol Methods* 134:1–6.
- 1543 111. Guo Y, et al. (2013) Integration Profiling of Gene Function With Dense Maps of  
1544 Transposon Integration. *Genetics* 195(2):599–609.
- 1545 112. Michel AH, et al. (2017) Functional mapping of yeast genomes by saturated  
1546 transposition. *eLife* 6. doi:10.7554/eLife.23570.
- 1547 113. Akerley BJ, et al. (1998) Systematic identification of essential genes by *in vitro*  
1548 *mariner* mutagenesis. *PNAS* 95(15):8927–8932.
- 1549 114. Kretschmer M, Wang J, Kronstad JW (2012) Peroxisomal and mitochondrial  $\beta$ -  
1550 oxidation pathways influence the virulence of the pathogenic fungus  
1551 *Cryptococcus neoformans*. *Eukaryotic Cell* 11(8):1042–1054.
- 1552 115. Maggio Hall LA, Keller NP (2004) Mitochondrial  $\beta$ -oxidation in *Aspergillus*  
1553 *nidulans*. *Molecular Microbiology* 54(5):1173–1185.



- 1554 116. Wanders RJA, Waterham HR, Ferdinandusse S (2015) Metabolic Interplay  
1555 between Peroxisomes and Other Subcellular Organelles Including Mitochondria  
1556 and the Endoplasmic Reticulum. *Front Cell Dev Biol* 3:83.
- 1557 117. Swigonová Z, Mohsen A-W, Vockley J (2009) Acyl-CoA dehydrogenases:  
1558 Dynamic history of protein family evolution. *J Mol Evol* 69(2):176–193.
- 1559 118. Chegary M, et al. (2009) Mitochondrial long chain fatty acid beta-oxidation in  
1560 man and mouse. *Biochim Biophys Acta* 1791(8):806–815.
- 1561 119. Birsoy K, et al. (2015) An Essential Role of the Mitochondrial Electron Transport  
1562 Chain in Cell Proliferation Is to Enable Aspartate Synthesis. *Cell* 162(3):540–  
1563 551.
- 1564 120. Khan BR, Adham AR, Zolman BK (2012) Peroxisomal Acyl-CoA oxidase 4  
1565 activity differs between *Arabidopsis* accessions. *Plant Mol Biol* 78(1-2):45–58.
- 1566 121. Hassan KA, et al. (2016) Fluorescence-Based Flow Sorting in Parallel with  
1567 Transposon Insertion Site Sequencing Identifies Multidrug Efflux Systems in  
1568 *Acinetobacter baumannii*. *MBio* 7(5):e01200–16.
- 1569 122. Tyo KEJ, Jin Y-S, Espinoza FA, Stephanopoulos G (2009) Identification of gene  
1570 disruptions for increased poly-3-hydroxybutyrate accumulation in *Synechocystis*  
1571 *PCC 6803*. *Biotechnol Prog* 25(5):1236–1243.
- 1572 123. Xie B, et al. (2014) High-throughput fluorescence-activated cell sorting for lipid  
1573 hyperaccumulating *Chlamydomonas reinhardtii* mutants. *Plant Biotechnol J*  
1574 12(7):872–882.
- 1575 124. Bozaquel-Morais BL, Madeira JB, Maya-Monteiro CM, Masuda CA, Montero-  
1576 Lomeli M (2010) A new fluorescence-based method identifies protein  
1577 phosphatases regulating lipid droplet metabolism. *PLOS ONE* 5(10).  
1578 doi:10.1371/journal.pone.0013692.
- 1579 125. Fei W, et al. (2011) A role for phosphatidic acid in the formation of “supersized”  
1580 lipid droplets. *PLoS Genet* 7(7). doi:10.1371/journal.pgen.1002201.
- 1581 126. Ruggles KV, et al. (2014) A functional, genome-wide evaluation of liposensitive  
1582 yeast identifies the “ARE2 required for viability” (ARV1) gene product as a major  
1583 component of eukaryotic fatty acid resistance. *J Biol Chem* 289(7):4417–4431.
- 1584 127. Currie E, et al. (2014) High confidence proteomic analysis of yeast LDs identifies  
1585 additional droplet proteins and reveals connections to dolichol synthesis and  
1586 sterol acetylation. *J Lipid Res* 55(7):1465–1477.
- 1587 128. Bouchez I, et al. (2015) Regulation of lipid droplet dynamics in *Saccharomyces*

- 1588 *cerevisiae* depends on the Rab7-like Ypt7p, HOPS complex and V1-ATPase.  
1589 *Biol Open* 4(7):764–775.
- 1590 129. Zhang SO, et al. (2010) Genetic and dietary regulation of lipid droplet expansion  
1591 in *Caenorhabditis elegans*. *Proc Natl Acad Sci USA* 107(10):4640–4645.
- 1592 130. Liu Z, Li X, Ge Q, Ding M, Huang X (2014) A lipid droplet-associated GFP  
1593 reporter-based screen identifies new fat storage regulators in *C. elegans*. *J*  
1594 *Genet Genomics* 41(5):305–313.
- 1595 131. Lee JH, et al. (2014) Lipid droplet protein LID-1 mediates ATGL-1-dependent  
1596 lipolysis during fasting in *Caenorhabditis elegans*. *Mol Cell Biol* 34(22):4165–  
1597 4176.
- 1598 132. Lapierre LR, Gelino S, Meléndez A, Hansen M (2011) Autophagy and Lipid  
1599 Metabolism Coordinately Modulate Life Span in Germline-less *C. elegans*.  
1600 *Current Biology* 21(18):1507–1514.
- 1601 133. Beller M, et al. (2006) Characterization of the *Drosophila* lipid droplet  
1602 subproteome. *Mol Cell Proteomics* 5(6):1082–1094.
- 1603 134. Krahmer N, et al. (2013) Protein correlation profiles identify lipid droplet proteins  
1604 with high confidence. *Mol Cell Proteomics* 12(5):1115–1126.
- 1605 135. Nishino N, et al. (2008) FSP27 contributes to efficient energy storage in murine  
1606 white adipocytes by promoting the formation of unilocular lipid droplets. *The*  
1607 *Journal of Clinical Investigation* 118(8):2808–2821.
- 1608 136. Tu Z, et al. (2009) Integrating siRNA and protein-protein interaction data to  
1609 identify an expanded insulin signaling network. *Genome Research* 19(6):1057–  
1610 1067.
- 1611 137. Pomraning KR, Bredeweg EL, Baker SE, Mitchell AP (2017) Regulation of  
1612 Nitrogen Metabolism by GATA Zinc Finger Transcription Factors in *Yarrowia*  
1613 *lipolytica*. *mSphere* 2(1):e00038–17.
- 1614 138. Silverman AM, Qiao K, Xu P, Stephanopoulos G (2016) Functional  
1615 overexpression and characterization of lipogenesis-related genes in the  
1616 oleaginous yeast *Yarrowia lipolytica*. *Appl Microbiol Biotechnol* 100(8):3781–  
1617 3798.
- 1618 139. Seip J, Jackson R, He H, Zhu Q, Hong S-P (2013) Snf1 is a regulator of lipid  
1619 accumulation in *Yarrowia lipolytica*. *Appl Environ Microbiol* 79(23):7360–7370.
- 1620 140. Mason RR, Watt MJ (2015) Unraveling the roles of PLIN5: linking cell biology to  
1621 physiology. *Trends Endocrinol Metab* 26(3):144–152.

- 1622 141. Castillon GA, et al. (2011) The yeast p24 complex regulates GPI-anchored  
1623 protein transport and quality control by monitoring anchor remodeling. *Mol Biol*  
1624 *Cell* 22(16):2924–2936.
- 1625 142. Tanaka S, Maeda Y, Tashima Y, Kinoshita T (2004) Inositol deacylation of  
1626 glycosylphosphatidylinositol-anchored proteins is mediated by mammalian  
1627 PGAP1 and yeast Bst1p. *Journal of Biological Chemistry* 279(14):14256–14263.
- 1628 143. Fujita M, Yoko-O T, Jigami Y (2006) Inositol deacylation by Bst1p is required for  
1629 the quality control of glycosylphosphatidylinositol-anchored proteins. *Mol Biol*  
1630 *Cell* 17(2):834–850.
- 1631 144. van Huizen R, Martindale JL, Gorospe M, Holbrook NJ (2003) P58IPK, a novel  
1632 endoplasmic reticulum stress-inducible protein and potential negative regulator  
1633 of eIF2alpha signaling. *Journal of Biological Chemistry* 278(18):15558–15564.
- 1634 145. Hutagalung AH, Novick PJ (2011) Role of Rab GTPases in membrane traffic and  
1635 cell physiology. *Physiological Reviews* 91(1):119–149.
- 1636 146. Wilson RS, Swatek KN, Thelen JJ (2016) Regulation of the Regulators: Post-  
1637 Translational Modifications, Subcellular, and Spatiotemporal Distribution of Plant  
1638 14-3-3 Proteins. *Frontiers in Plant Science* 7:2044.
- 1639 147. Bajaj Pahuja K, et al. (2015) Phosphoregulatory protein 14-3-3 facilitates SAC1  
1640 transport from the endoplasmic reticulum. *Proc Natl Acad Sci USA*  
1641 112(25):E3199–E3206.
- 1642 148. Riou P, et al. (2013) 14-3-3 Proteins Interact with a Hybrid Prenyl-  
1643 Phosphorylation Motif to Inhibit G Proteins. *Cell* 153(5):1164.
- 1644 149. Goitre L, Trapani E, Trabalzini L, Retta SF (2014) The Ras superfamily of small  
1645 GTPases: the unlocked secrets. *Methods in Molecular Biology*, Methods in  
1646 Molecular Biology. (Humana Press, Totowa, NJ), pp 1–18.
- 1647 150. Campa CC, Ciruolo E, Ghigo A, Germena G, Hirsch E (2015) Crossroads of  
1648 PI3K and Rac pathways. *Small GTPases* 6(2):71–80.
- 1649 151. Choi J, Jung WH, Kronstad JW (2015) The cAMP/protein kinase A signaling  
1650 pathway in pathogenic basidiomycete fungi: Connections with iron homeostasis.  
1651 *J Microbiol* 53(9):579–587.
- 1652 152. Nikolaou E, et al. (2009) Phylogenetic diversity of stress signalling pathways in  
1653 fungi. *BMC Evol Biol* 9:44.
- 1654 153. Hagiwara D, Sakamoto K, Abe K, Gomi K (2016) Signaling pathways for stress  
1655 responses and adaptation in *Aspergillus* species: stress biology in the post-

- 1656 genomic era. *Biosci Biotechnol Biochem* 80(9):1667–1680.
- 1657 154. Singh R, et al. (2009) Autophagy regulates adipose mass and differentiation in  
1658 mice. *The Journal of Clinical Investigation* 119(11):3329–3339.
- 1659 155. Shibata M, et al. (2009) The MAP1-LC3 conjugation system is involved in lipid  
1660 droplet formation. *Biochemical and Biophysical Research Communications*  
1661 382(2):419–423.
- 1662 156. Shibata M, et al. (2010) LC3, a microtubule-associated protein1A/B light chain3,  
1663 is involved in cytoplasmic lipid droplet formation. *Biochemical and Biophysical*  
1664 *Research Communications* 393(2):274–279.
- 1665 157. Singh R, et al. (2009) Autophagy regulates lipid metabolism. *Nature*  
1666 458(7242):1131–1135.
- 1667 158. Ouimet M, et al. (2011) Autophagy Regulates Cholesterol Efflux from  
1668 Macrophage Foam Cells via Lysosomal Acid Lipase. *Cell Metab* 13(6):655–667.
- 1669 159. van Zutphen T, et al. (2014) Lipid droplet autophagy in the yeast  
1670 *Saccharomyces cerevisiae*. *Mol Biol Cell* 25(2):290–301.
- 1671 160. Seo AY, et al. (2017) AMPK and vacuole-associated Atg14p orchestrate  $\mu$ -  
1672 lipophagy for energy production and long-term survival under glucose starvation.  
1673 *eLife* 6. doi:10.7554/eLife.21690.
- 1674 161. Dupont N, et al. (2014) Neutral Lipid Stores and Lipase PNPLA5 Contribute to  
1675 Autophagosome Biogenesis. *Current Biology* 24(6):609–620.
- 1676 162. Maeda Y, Oku M, Sakai Y (2017) Autophagy-independent function of Atg8 in  
1677 lipid droplet dynamics in yeast. *J Biochem* 161(4):339–348.
- 1678 163. Luttk MA, et al. (2000) The *Saccharomyces cerevisiae* *ICL2* gene encodes a  
1679 mitochondrial 2-methylisocitrate lyase involved in propionyl-coenzyme A  
1680 metabolism. *J Bacteriol* 182(24):7007–7013.
- 1681 164. Tabuchi T, Serizawa N (2014) A Hypothetical Cyclic Pathway for the Metabolism  
1682 of Odd-carbon n-Alkanes or Propionyl-CoA via Seven-carbon Tricarboxylic Acids  
1683 in Yeasts. *Agricultural and Biological Chemistry* 39(5):1055–1061.
- 1684 165. Kerkhoven EJ, Pomraning KR, Baker SE, Nielsen J (2016) Regulation of amino-  
1685 acid metabolism controls flux to lipid accumulation in *Yarrowia lipolytica*. *NPJ*  
1686 *Syst Biol Appl* 2:16005.
- 1687 166. Agris PF, Vendeix FAP, Graham WD (2007) tRNA's Wobble Decoding of the  
1688 Genome: 40 Years of Modification. *Journal of Molecular Biology* 366(1):1–13.

- 1689 167. Zinshteyn B, Gilbert WV (2013) Loss of a Conserved tRNA Anticodon  
1690 Modification Perturbs Cellular Signaling. *PLoS Genet* 9(8).  
1691 doi:10.1371/journal.pgen.1003675.
- 1692 168. Hopper AK, Phizicky EM (2003) tRNA transfers to the limelight. *Genes Dev*  
1693 17(2):162–180.
- 1694 169. Abbott EP, Ianiri G, Castoria R, Idnurm A (2013) Overcoming recalcitrant  
1695 transformation and gene manipulation in *Pucciniomycotina* yeasts. *Appl*  
1696 *Microbiol Biotechnol* 97(1):283–295.
- 1697 170. Nicaud J-M, Coq A-MC-L, Rossignol T, Morin N (2014) Protocols for Monitoring  
1698 Growth and Lipid Accumulation in Oleaginous Yeasts. *Hydrocarbon and Lipid*  
1699 *Microbiology Protocols*, Springer Protocols Handbooks. (Springer Berlin  
1700 Heidelberg, Berlin, Heidelberg), pp 153–169.
- 1701 171. Li L (2003) OrthoMCL: Identification of Ortholog Groups for Eukaryotic  
1702 Genomes. *Genome Research* 13(9):2178–2189.
- 1703 172. Mersereau M, Pazour GJ, Das A (1990) Efficient transformation of  
1704 *Agrobacterium tumefaciens* by electroporation. *Gene* 90(1):149–151.
- 1705 173. Levenshtein VI (1966) Binary codes capable of correcting deletions, insertions,  
1706 and reversals. *Soviet Physics Doklady* 10:707.
- 1707 174. Illumina, Inc (2013) *Using a PhiX Control for HiSeq Sequencing Runs* (Illumina  
1708 Technical Note).
- 1709 175. de Hoon MJL, Imoto S, Nolan J, Miyano S (2004) Open source clustering  
1710 software. *Bioinformatics* 20(9):1453–1454.
- 1711 176. Benjamini Y, Hochberg Y (1995) Controlling the False Discovery Rate: A  
1712 Practical and Powerful Approach to Multiple Testing. *Journal of the Royal*  
1713 *Statistical Society* 57(1):289–300.
- 1714 177. Ashburner M, et al. (2000) Gene Ontology: tool for the unification of biology.  
1715 *Nature Genetics* 25(1):25–29.
- 1716 178. Gene Ontology Consortium (2015) Gene Ontology Consortium: going forward.  
1717 *Nucleic Acids Res* 43(Database issue):D1049–56.
- 1718 179. Browse J, McCourt PJ, Somerville CR (1986) Fatty acid composition of leaf  
1719 lipids determined after combined digestion and fatty acid methyl ester formation  
1720 from fresh tissue. *Anal Biochem* 152(1):141–145.
- 1721 180. Luthe DS (1983) A simple technique for the preparation and storage of sucrose  
1722 gradients. *Anal Biochem* 135(1):230–232.

1723 181. Schindelin J, et al. (2012) Fiji: an open-source platform for biological-image  
1724 analysis. *Nature Methods* 9(7):676–682.

1725

## 1 **Supplementary Text**

### 3 **Refining the *R. toruloides* IFO 0880 genome sequence and annotation.**

4 An effective functional genomics approach requires high quality genomic sequence and  
5 reliable gene models. To improve assembly, we added long-read sequencing from  
6 Pacific Biosciences to our previously published data from Illumina sequencing (1). The  
7 refined gapless assembly is high quality, consisting of 21 megabases on 30 scaffolds  
8 (N50 = 6, L50 = 1.4 Mb) and a complete 112 Kb mitochondrial genome. Seven *de novo*  
9 scaffolds have telomeric repeats (2) at both ends, suggesting they represent complete  
10 chromosomes, and seven scaffolds have a telomeric repeat at one end (Supplementary  
11 file 1). For comparison, electrophoretic karyotyping of *R. toruloides* NP11 indicated 16  
12 total chromosomes (3). We also used 100bp paired-end Illumina sequencing of mRNA  
13 to improve gene model prediction. The revised genome (*Rhodospiridium toruloides*  
14 IFO0880 v4.0) encoding 8490 predicted proteins is available at the Joint Genome  
15 Institute's MycoCosm genome portal (4) and Genbank accession LCTV02000000.  
16 While the bulk of the gene models were predicted with the JGI's automated protocols,  
17 erroneous fusion of neighboring genes was a significant issue. We have manually  
18 corrected several hundred fused models not supported by RNAseq data and encourage  
19 the *R. toruloides* research community to continue annotation refinement through the JGI  
20 portal. Summary tables of gene IDs, predicted functions, and probable orthologs in  
21 other systems are included in Supplementary file 1.

### 23 **Additional detail on mapping insertion locations with RB-TDNAseq**

24 We adapted a high-throughput phenotyping strategy previously demonstrated in  
25 bacteria (5) by employing *Agrobacterium tumefaciens* mediated transformation  
26 (ATMT)(Figure 1A). Briefly, we created a large barcoded mutant pool in which *A.*  
27 *tumefaciens* transfer DNAs (T-DNA) bearing an antibiotic resistance cassette and a 20  
28 base-pair random sequence (barcode) were inserted randomly throughout the genome.  
29 We then mapped the location of each insertion and its associated barcode with RB-  
30 TDNAseq, a variant of RB-TnSeq (a high-throughput method to enrich and sequence a  
31 diverse pool of transposon/genome junctions (5)), applied to T-DNA inserts. A more  
32 detailed view of the junction sequence and primers used for RB-TDNAseq and BarSeq  
33 are shown in Figure 1 – figure supplement 1.

34  
35 From a mutant pool of approximately two million *R. toruloides* colonies, we sequenced  
36 1,391,040 unique barcoded insertions with RB-TDNAseq. We successfully mapped  
37 293,613 barcodes (21%) to T-DNA insertions at unique, unambiguous locations in the  
38 *R. toruloides* genome. The remainder of sequenced barcodes could not be mapped for  
39 several reasons (Figure 1 – figure supplement 2A). T-DNA is often inserted in  
40 concatemeric repeats (6-8), in which case only RB-TDNAseq reads from the terminal  
41 repeat provides mapping information. If the terminal repeat is truncated (9), or if it abuts  
42 genomic sequence that is recalcitrant to sequencing for any reason, then we are able to  
43 detect the barcode at junctions between T-DNA repeats, but not at junctions with the  
44 genome. 47% of sequence barcodes were not mappable for this reason. Likewise, if

45 the terminal T-DNA is inserted in an inverted orientation, the result is an unmappable  
46 convergent concatemer (5% of barcodes). About 16% of barcodes were associated  
47 with vector sequence outside the T-DNA sequence, indicating integration of  
48 unprocessed plasmid into the genome. Approximately 1% of RB-TDNAseq reads  
49 mapped equally well to two or more highly similar sequences and thus we could not  
50 determine which locus is the true site of insertion. Finally, another 1% of barcodes  
51 appeared in distinct RB-TDNAseq reads mapping to two or more sequences,  
52 suggesting two or more different mutant strains have received the same barcode,  
53 rendering those strains indistinguishable in BarSeq data.

54  
55 T-DNA can integrate into multiple locations in the same genome, giving rise to  
56 confounding phenotypes between different mutations. Rates of multi-locus insertion  
57 range widely (5% to 45%) depending on transformation conditions and the targeted cell  
58 type (7, 10-13). Multi-locus insertions can be derived from multiple copies of T-DNA  
59 from a single transformation event, or from co-transformation of distinct T-DNAs. Since  
60 only 1% of barcodes mapped to multiple locations, we inferred the former scenario was  
61 rare. To estimate the frequency of multiple insertion events from co-transformation, we  
62 isolated single colonies and then sequenced their barcodes using PCR amplification  
63 with Sanger sequencing. Of 58 colonies with unambiguous sequence of the common  
64 sequence preceding the random barcodes, 41 colonies (71%) had a single, unique  
65 sequence in the barcode region, suggesting a single barcode was present, and 17  
66 colonies (29%) had mixed signals in the barcode region suggesting T-DNAs with  
67 multiple barcodes were present (example traces in Figure 2 – figure supplement 2B).  
68 This estimate may be biased by sequence artifacts and should be taken as an upper  
69 bound. Furthermore, co-transformed T-DNAs are often integrated into a single  
70 concatemeric repeat (11, 14, 15). Thus, far fewer than 29% of strains may actually  
71 harbor T-DNA insertions at multiple loci. Conversely, T-DNA insertions have been  
72 shown to cause other local mutations (6% of insertions were associated with deletions  
73 of more than 100 bp and 0.7% with local inversions in *A. thaliana*(16)). These combined  
74 sources of confounding phenotypes highlight the importance of integrating data from  
75 multiple T-DNA insertions in any fitness analysis. As such, our main concern in  
76 constructing our mutant pool was to effectively probe the entire genome with multiple  
77 inserts per gene.

#### 78 79 **Fine-scale biases in T-DNA insertion sites**

80 On a genome level, there was no significant bias in rates of T-DNA insertion, with  
81 insertion number proportional to scaffold length (Figure 1 – figure supplement 3A) and  
82 no apparent bias in insertion rates with respect to local GC content (Figure 1 – figure  
83 supplement 3B). We did observe some bias in T-DNA insertion sites at the kilobase  
84 scale, however. T-DNAs were mapped within intergenic regions at a higher rate than  
85 expected given the composition of the genome (Figure 1 – figure supplement 3C). For  
86 instance, 20% of T-DNA inserts were mapped in promoter regions, even though these  
87 regions only constitute 8% of the genome. This bias towards promoter regions is  
88 consistent with observations in *Cryptococcus neoformans* (17), in *Magnaporthe oryzae*



89 (12), and with the fact that 41% of T-DNA insertions in *S. cerevisiae* mapped in  
90 intergenic regions (18) though only 27% of the *S. cerevisiae* genome is intergenic (19).  
91 We also observed further fine-scale variation in the density of mapped insertions, with  
92 dozens of T-DNA ‘hotspots’ on each scaffold with a higher local density of T-DNA  
93 insertion that cannot be explained by a simulated random integration with the observed  
94 biases towards promoters, terminators and five-prime UTRs (Figure 1 – figure  
95 supplement 3D). We have not explored the mechanism of these fine scale biases,  
96 though microhomology to T-DNA borders and local DNA bendability have been  
97 suggested as influencing T-DNA insertion into eukaryotic genomes (12, 20).

98

### 99 **Additional information on calculating fitness scores and T-like test statistics**

100 For each barcoded T-DNA insertion, we calculate the  $\log_2$  ratio of abundance before  
101 and after competitive growth in the experimental condition.  $F$  is the average of those  
102 ratios (weighted by sequence depth) for all the insertions disrupting a given gene.  $T$  is a  
103 modified student’s  $T$ -statistic, a measure of statistical significance of  $F$  that incorporates  
104 consistency between individual insertions across biological replicate cultures. We  
105 observed a wide range in relative abundance of individual mutant strains (i.e. relative  
106 counts for different barcodes in BarSeq data). In a typical fitness experiment, we  
107 sequenced each sample to a depth of 20 million reads (as opposed to 900 million reads  
108 to map insertion locations by RB-TDNAseq). At this depth, approximately 40,000  
109 mapped barcodes (14%) were too rare to count. Countable barcodes ranged from 1 to  
110 1000 counts per sample with a mode around 10 (Figure 2 – figure supplement 1A).  
111 Further, for estimating strain abundance in fitness experiments we considered only  
112 insertions in the central 80% of the coding region to avoid confounding data from  
113 incorrectly predicted gene boundaries, functional truncated proteins, and altered  
114 expression of neighboring genes. Within these constraints, we were able to measure  
115 fitness for 6,558 genes (92% of non-essential genes) by tracking abundance of 68,021  
116 insertions in coding regions with a median of 7 insertions per gene (Figure 2 – figure  
117 supplement 1B).

118

### 119 **Methionine and Arginine biosynthesis in *R. toruloides*.**

120 Our fitness data were consistent with established models of arginine biosynthesis in *S.*  
121 *cerevisiae*, and cysteine and methionine synthesis in *A. nidulans* (Figure 2 – figure  
122 supplement 2). Out of 13 genes required to produce methionine from sulfate, one gene  
123 (*MET7*) was essential in mutant construction conditions, 11 genes (*MET1*, *MET2*,  
124 *MET3*, *MET5*, *MET6*, *MET10*, *MET12*, *MET13*, *MET14*, *MET16*, and *GDH1*) had  
125 significantly different fitness scores between supplemented conditions (YPD, DOC, or  
126 methionine) and the non-supplemented condition. One gene (*MET8*) fell just below our  
127 statistical cutoffs, with fitness scores suggesting methionine/cysteine auxotrophy, but  
128 the magnitude of the  $T$ -statistics for supplemented conditions (YPD, DOC, or methionine  
129 supplementation) versus non-supplemented conditions never exceeded 2.7. We also  
130 noted that though the transulfuration pathway and *MET17* were dispensable,  
131 *RTO4\_15248* and *RTO4\_12031* (orthologs of *A. nidulans cysA* and *cysB*) were required  
132 for robust growth, suggesting sulfur uptake occurs primarily through cysteine. Nine of

133 nine genes expected to be required for arginine biosynthesis (*ARG1-8*, *CPA1*, and  
134 *CPA2*) had significant fitness scores suggesting auxotrophy. So did *IDP1* and *GDH1*,  
135 suggesting the primary source of glutamate in our conditions was from ammonia and 2-  
136 oxoglutarate. The mitochondrial ornithine transporter *ORT1* was also required for  
137 arginine prototrophy, but *AGC1* was not, suggesting alternative routes for glutamate  
138 transport.

139

#### 140 **K-means clusters of fitness scores on fatty acids**

141 Cluster FA1 consists of 21 genes for which mutants had consistent growth defects  
142 across all three fatty acids. These genes included three mitochondrial beta-oxidation  
143 enzymes; the acyl-CoA dehydrogenase *RTO4\_14070* (ortholog of *Homo sapiens*  
144 *ACADSB*), the enoyl-CoA hydratase *RTO4\_14805* (ortholog of *H. sapiens ECHS1*), and  
145 the hydroxyacyl-CoA dehydrogenase *RTO4\_11203* (ortholog of *H. sapiens HADH*).  
146 Also included were the electron-transferring-flavoprotein subunit *AIM45* and the  
147 electron-transferring-flavoprotein dehydrogenase *CIR2*, likely reflective of electron-  
148 transferring-flavoproteins' known role as an electron receptor for acyl-CoA  
149 dehydrogenases (21). The carnitine O-acetyltransferase *CAT2* (involved in fatty-acyl-  
150 CoA transfer in the mitochondria (22)) and *PEX11* (involved in peroxisome division and  
151 possibly interaction between peroxisomes and mitochondria(23)) were also in cluster  
152 FA1. Rounding out cluster FA1 were nine genes with likely roles in gluconeogenesis,  
153 glucose homeostasis and/or growth on non-preferred carbon sources (*FBP1*,  
154 *RTO4\_14162* (ortholog of *ICL1*), *MLS1*, *GLG1*, *MRK1*, *SNF1*, *SNF3*, *SNF4*,  
155 *RTO4\_11412* (similar to *SWI1*); two genes involved in mitochondrial amino acid  
156 metabolism (*PUT2* and *AGC1*); the peroxidase *RTO4\_10811* (ortholog of *CCP1*); and  
157 *RTO4\_12955*, a LYRM domain-containing protein with likely roles in mitochondrial  
158 electron transport (24).

159

160 Clusters FA2 through FA7 were comprised of 108 genes for which mutants had stronger  
161 fitness defects on one or two fatty acids, primarily genes with stronger defects on  
162 methylricinoleic acid and ricinoleic acids (FA2 and FA3, 55 genes) or on ricinoleic acid  
163 only (FA4 and FA5, 30 genes). These clusters were comprised of genes with predicted  
164 roles in various aspects of cellular homeostasis including amino acid metabolism,  
165 glycogen metabolism, phospholipid metabolism, protein glycosylation, the mitochondrial  
166 electron transport chain, and 17 genes with no well-characterized homologs. See  
167 Supplementary file 2 for a complete list. Clusters FA2 and FA7 also included 10 genes  
168 predicted to play direct roles in peroxisomal beta-oxidation, however. Cluster FA2  
169 (stronger defect on methylricinoleic and ricinoleic acid) included *RTO4\_10408* (ortholog  
170 of *H. sapiens ACAD11*), *RTO4\_14567* (similar to *H. sapiens ACAD11*), acyl-CoA  
171 oxidase *RTO4\_12742* (ortholog of *POX1*), and *RTO4\_8673* (similar to *PEX11*). Cluster  
172 FA7 (stronger defect on oleic acid) included 3-ketoacyl-CoA thiolase *RTO4\_13813*  
173 (ortholog of *POT1*), enoyl-CoA hydratase *RTO4\_11907* (ortholog of *H. sapiens ECH1*),  
174 3-hydroxyacyl-CoA dehydrogenase/enoyl-CoA hydratase *FOX2*, predicted acyl-CoA  
175 dehydrogenase *RTO4\_8963*, and peroxisomal signal receptors *PEX7* and *RTO4\_13505*  
176 (similar to *PEX5*).

177

## 178 **BODIPY 493/503 and buoyancy as measures of lipid content in *R. toruloides***

179 Under carbon-replete growth conditions in which nitrogen, sulfur, or phosphorus are  
180 limiting, *R. toruloides* accumulates up to 70% of its dry weight in neutral lipids (25-28).  
181 These lipids are stored as triacylglycerides (TAG) in specialized organelles called lipid  
182 droplets (reviewed in (29-31))(*R. toruloides* lipid droplets visualized in Figure 4A).  
183 BODIPY staining has been used extensively to label lipids and we find that in *R.*  
184 *toruloides* cultures, average cellular BODIPY signal correlates well with total fatty acid  
185 methyl ester content as quantified using gas chromatography with flame ionization  
186 detection (Figure 4 – figure supplement 1). Because lipid droplets have lower density  
187 than most cell components, as cells accumulate large lipid droplets, they become more  
188 buoyant (Figure 4 – figure supplement 2).

189

## 190 **NADPH production in *R. toruloides***

191 *R. toruloides* has two predicted malic enzymes, *RTO4\_12761* and *RTO4\_13917*, which  
192 could theoretically provide NADPH for fatty acid synthesis. Their specificities for NAD<sup>+</sup>  
193 versus NADP<sup>+</sup>, are unknown but *RTO4\_12761* is more closely related to the NADP-  
194 specific malic enzyme from *Mucor circinelloides* (32) and Zhu et al. measured increased  
195 protein levels in nitrogen-limited conditions (3). Neither gene had significant enrichment  
196 scores in our lipid accumulation assays. We mapped very low insertion density in the  
197 major enzymes of the pentose phosphate pathway (the primary source for NADPH in *Y.*  
198 *lipolytica* (33)) in our pool, suggesting it was essential in our library construction  
199 conditions. As such, the primary source of NADPH in *R. toruloides* remains  
200 unconfirmed. Our data are consistent with recent predictions from a simplified  
201 metabolic model for *R. toruloides* that during lipid production from glucose, the pentose  
202 phosphate pathway should account for greater metabolic flux and NADPH production  
203 than malic enzyme (34).

204

205 *YEF1* may also increase the supply of NADPH by phosphorylation of NADH, but  
206 presumably this reaction could only play a significant role in fatty acid synthesis if  
207 NADP<sup>+</sup> is efficiently converted to NAD<sup>+</sup> for reduction by NAD(+)-dependent enzymes.  
208 NADPH phosphatase activity has been observed for inositol monophosphatases of  
209 archaea (35), but these activities have not been well explored in fungal species.  
210 Alternatively, *YEF1* may be required for efficient lipid accumulation simply because in its  
211 absence the total cytosolic NADP(H) concentration is too low for efficient fatty acid  
212 synthesis, regardless of the balance between NADP<sup>+</sup> and NADPH.

213

## 214 **References for Supplementary Text**

215

216 1. Zhang S, et al. (2016) Engineering *Rhodospiridium toruloides* for increased lipid  
217 production. *Biotechnol Bioeng* 113(5):1056–1066.

218 2. Ramirez L, Perez G, Castanera R, Santoyo F, G A (2011) Basidiomycetes  
219 Telomeres – A Bioinformatics Approach. *Bioinformatics - Trends and*  
220 *Methodologies*, ed A Mahdavi M (InTech). doi:10.5772/21620.

- 221 3. Zhu Z, et al. (2012) A multi-omic map of the lipid-producing yeast *Rhodospodium*  
222 *toruloides*. *Nat Commun* 3:1112.
- 223 4. Nordberg H, et al. (2014) The genome portal of the Department of Energy Joint  
224 Genome Institute: 2014 updates. *Nucleic Acids Res* 42(Database issue):D26–31.
- 225 5. Wetmore KM, et al. (2015) Rapid quantification of mutant fitness in diverse  
226 bacteria by sequencing randomly bar-coded transposons. *MBio* 6(3):e00306–15.
- 227 6. Rolloos M, Dohmen MHC, Hooykaas PJJ, van der Zaal BJ (2014) Involvement of  
228 Rad52 in T-DNA circle formation during *Agrobacterium tumefaciens*-mediated  
229 transformation of *Saccharomyces cerevisiae*. *Molecular Microbiology* 91(6):1240–  
230 1251.
- 231 7. Kunitake E, Tani S, Sumitani J-I, Kawaguchi T (2011) *Agrobacterium*  
232 *tumefaciens*-mediated transformation of *Aspergillus aculeatus* for insertional  
233 mutagenesis. *AMB Express* 1(1):46.
- 234 8. Sullivan TD, Rooney PJ, Klein BS (2002) *Agrobacterium tumefaciens* integrates  
235 transfer DNA into single chromosomal sites of dimorphic fungi and yields  
236 homokaryotic progeny from multinucleate yeast. *Eukaryotic Cell* 1(6):895–905.
- 237 9. Bundock P, Hooykaas PJ (1996) Integration of *Agrobacterium tumefaciens* T-DNA  
238 in the *Saccharomyces cerevisiae* genome by illegitimate recombination. *Proc Natl*  
239 *Acad Sci USA* 93(26):15272–15275.
- 240 10. Ondřej M, Kocábek T, Rakouský S, Wiesnerová D (1999) Segregation of T-DNA  
241 inserts in the offspring of *Arabidopsis thaliana* after *Agrobacterium* transformation.  
242 *Biologia Plantarum* 42(2):185–195.
- 243 11. Neve M, Buck S, Jacobs A, Montagu M, Depicker A (1997) T-DNA integration  
244 patterns in co-transformed plant cells suggest that T-DNA repeats originate from  
245 co-integration of separate T-DNAs. *The Plant Journal* 11(1):15–29.
- 246 12. Choi J, et al. (2007) Genome-wide analysis of T-DNA integration into the  
247 chromosomes of *Magnaporthe oryzae*. *Molecular Microbiology* 66(2):371–382.
- 248 13. Głowacka K, et al. (2016) An evaluation of new and established methods to  
249 determine T-DNA copy number and homozygosity in transgenic plants. *Plant,*  
250 *Cell, and Environment* 39(4):908–917.
- 251 14. De Buck S, Podevin N, Nolf J, Jacobs A, Depicker A (2009) The T-DNA  
252 integration pattern in *Arabidopsis* transformants is highly determined by the  
253 transformed target cell. *The Plant Journal* 60(1):134–145.
- 254 15. De Block M, Debrouwer D (1991) Two T-DNA's co-transformed into Brassica

- 255 napus by a double *Agrobacterium tumefaciens* infection are mainly integrated at  
256 the same locus. *Theoret Appl Genetics* 82(3):257–263.
- 257 16. Kleinboelting N, et al. (2015) The Structural Features of Thousands of T-DNA  
258 Insertion Sites Are Consistent with a Double-Strand Break Repair-Based Insertion  
259 Mechanism. *Molecular Plant* 8(11):1651–1664.
- 260 17. Walton FJ, Idnurm A, Heitman J (2005) Novel gene functions required for  
261 melanization of the human pathogen *Cryptococcus neoformans*. *Molecular*  
262 *Microbiology* 57(5):1381–1396.
- 263 18. Bundock P, van Attikum H, Dulk Ras den A, Hooykaas PJJ (2002) Insertional  
264 mutagenesis in yeasts using T-DNA from *Agrobacterium tumefaciens*. *Yeast*  
265 19(6):529–536.
- 266 19. Alexander RP, Fang G, Rozowsky J, Snyder M, Gerstein MB (2010) Annotating  
267 non-coding regions of the genome. *Nat Rev Genet* 11(8):559–571.
- 268 20. Zhang J, et al. (2007) Non-random distribution of T-DNA insertions at various  
269 levels of the genome hierarchy as revealed by analyzing 13 804 T-DNA flanking  
270 sequences from an enhancer-trap mutant library. *The Plant Journal* 49(5):947–  
271 959.
- 272 21. Izai K, Uchida Y, Orii T, Yamamoto S, Hashimoto T (1992) Novel fatty acid beta-  
273 oxidation enzymes in rat liver mitochondria. I. Purification and properties of very-  
274 long-chain acyl-coenzyme A dehydrogenase. *Journal of Biological Chemistry*  
275 267(2):1027–1033.
- 276 22. Strijbis K, et al. (2010) Contributions of carnitine acetyltransferases to intracellular  
277 acetyl unit transport in *Candida albicans*. *J Biol Chem* 285(32):24335–24346.
- 278 23. Mattiazzi Ušaj M, et al. (2015) Genome-Wide Localization Study of Yeast Pex11  
279 Identifies Peroxisome–Mitochondria Interactions through the ERMES Complex.  
280 *Journal of Molecular Biology* 427(11):2072–2087.
- 281 24. Angerer H (2013) The superfamily of mitochondrial Complex1\_LYR motif-  
282 containing (LYRM) proteins. *Biochemical Society Transactions* 41(5):1335–1341.
- 283 25. Li Y, Zhao ZK, Bai F (2007) High-density cultivation of oleaginous yeast  
284 *Rhodospiridium toruloides* Y4 in fed-batch culture. *Enzyme and Microbial*  
285 *Technology* 41(3):312–317.
- 286 26. Wiebe MG, Koivuranta K, Penttilä M, Ruohonen L (2012) Lipid production in batch  
287 and fed-batch cultures of *Rhodospiridium toruloides* from 5 and 6 carbon  
288 carbohydrates. *BMC Biotechnol* 12(1):26–10.

- 289 27. Wu S, Zhao X, Shen H, Wang Q, Zhao ZK (2011) Microbial lipid production by  
290 *Rhodospiridium toruloides* under sulfate-limited conditions. *Bioresour Technol*  
291 102(2):1803–1807.
- 292 28. Wu S, Hu C, Jin G, Zhao X, Zhao ZK (2010) Phosphate-limitation mediated lipid  
293 production by *Rhodospiridium toruloides*. *Bioresour Technol* 101(15):6124–6129.
- 294 29. Fujimoto T, Parton RG (2011) Not just fat: the structure and function of the lipid  
295 droplet. *Cold Spring Harb Perspect Biol* 3(3):a004838–a004838.
- 296 30. Walther TC, Farese RV (2012) Lipid droplets and cellular lipid metabolism. *Annu*  
297 *Rev Biochem* 81(1):687–714.
- 298 31. Farese RV, Walther TC (2009) Lipid droplets finally get a little R-E-S-P-E-C-T.  
299 *Cell* 139(5):855–860.
- 300 32. Zhang Y, Adams IP, Ratledge C (2007) Malic enzyme: the controlling activity for  
301 lipid production? Overexpression of malic enzyme in *Mucor circinelloides* leads to  
302 a 2.5-fold increase in lipid accumulation. *Microbiology* 153(7):2013–2025.
- 303 33. Wasylenko TM, Ahn WS, Stephanopoulos G (2015) The oxidative pentose  
304 phosphate pathway is the primary source of NADPH for lipid overproduction from  
305 glucose in *Yarrowia lipolytica*. *Metab Eng* 30:27–39.
- 306 34. Bommareddy RR (2015) Metabolic network analysis and experimental study of  
307 lipid production in *Rhodospiridium toruloides* grown on single and mixed  
308 substrates. 1–13.
- 309 35. Fukuda C, Kawai S, Murata K (2007) NADP(H) phosphatase activities of archaeal  
310 inositol monophosphatase and eubacterial 3'-phosphoadenosine 5'-phosphate  
311 phosphatase. *Appl Environ Microbiol* 73(17):5447–5452.

312

**Figure 1. Overview of RB-TDNaseq and T-DNA insert density in *R. toruloides* coding regions.** (A) General strategy of RB-TDNaseq. A library of binary plasmids bearing an antibiotic resistance cassette (NAT<sup>R</sup>) and a random 20 base-pair sequence ‘barcode’ (N20) flanked by specific priming sites (P1/P2) is introduced into a population of *A. tumefaciens* carrying a *vir* helper plasmid. *A. tumefaciens* efficiently transforms a T-DNA fragment into the target fungus (ATMT). NAT<sup>R</sup> colonies are then combined to make a mutant pool. T-DNA-genome junctions are sequenced by TnSeq, thereby associating barcodes with the location of the insertion (Map). The mutant pool is then cultured under specific conditions and the relative abundance of mutant strains is measured by sequencing a short, specific, PCR on the barcodes (BarSeq) and counting the occurrence of each sequence (Count). Finally, for each gene, count data is combined across all barcodes mapping to insertions in that gene to obtain a robust measure of relative fitness for strains bearing mutations in that gene (Fitness Estimation). (B) Histogram of insert density in coding regions (start codon to stop codon) for all genes, and genes with orthologs reported to be essential in *A. nidulans*, *C. neoformans*, *N. crassa*, *S. cerevisiae*, or *S. pombe*.

The following figure supplements are available for Figure 1:

**Figure 1 Supplement 1. Schematic of TnSeq and BarSeq libraries generated using RB-TDNaseq.** (A) In the TnSeq protocol, genomic DNA is sheared into ~300 bp fragments, and Illumina TruSeq adapters are ligated on both ends. T-DNA junctions are then specifically enriched by PCR with a T-DNA-specific and an adapter-specific primer. (B) In the BarSeq protocol, genomic DNA is used as a template for a more robust and quantitative PCR on the barcoded region of the T-DNA insert. Phasing error caused by the identical T-DNA sequences flanking the random barcodes was reduced by adding sequence diversity at the beginning of each read, either by the introduction of a short random 6 bp sequence or a 4-6 bp random sequence for TnSeq and BarSeq, respectively.

**Figure 1 Supplement 2. Complexities of T-DNA insertions.** (A) Inferred topology of T-DNA insertions from associations of barcodes and adjacent genomic or T-DNA sequence. Only three of the observed insertion types could be mapped using the TnSeq protocol. (B) Sanger sequencing of barcodes from single colonies isolated from the pool. Multiple overlapping peaks in the barcode region suggest multiple T-DNAs are present in a single strain. Note that these T-DNAs may be integrated at the same, or different loci. Inherent noise in barcode amplification and sequencing introduces significant ambiguity in this analysis. The inferred rate of multiple barcode insertion (29%) should be considered a maximum estimate.

**Figure 1 Supplement 3. Observed biases in T-DNA insertion locations.** (A) Frequency of T-DNA insertion mapping was consistent across all 30 IFO 0880 scaffolds. (B) Histogram of GC content in 100 base pair regions flanking insertion sites and in random 100 base pair regions. (C) Proportion of the *R. toruloides* IFO 0880 genome in promoter regions, terminator regions, untranslated regions transcribed to mRNA, coding exons, and introns versus the proportion of T-DNA insertions mapped to those sequences. (D) Distribution of T-DNA insertion density across the length of scaffold 1. Total inserts were summed across a rolling 1000 base pair window using the observed insertions and a simulated random mutant pool assuming biases for insertion in promoters, terminators and untranslated transcribed regions.

**Figure 2. Confirmation of amino acid biosynthetic genes with high-throughput fitness experiments.** (A) Fitness scores for 6,558 genes in media with and without amino acid supplementation (drop-out complete mix). Gene fitness scores are log ratios of final versus starting abundance averaged over multiple barcoded insertions per gene across 3 biological replicates. Genes that had significantly different enrichment scores between treatments ( $\Delta F > 1$ ,  $|T|$  statistic  $> 3$ ) are highlighted and represent genes for which mutant strains are auxotrophic for one or more amino acids, nucleotides, or vitamins present in the drop-out-complete mixture. (B) Fitness scores in media supplemented with arginine or methionine. Highlighted genes are the same as highlighted in (A). Deletion strains for circled or boxed genes are auxotrophic for methionine or arginine, respectively, in *S. cerevisiae* or *A. nidulans*. See supplementary file 2 for full fitness data.

The following figure supplements are available for Figure 2:

**Figure 2 Supplement 1. Barcode abundance in BarSeq experiments.** (A) Histogram of barcode abundance in a typical BarSeq experiment with 20 million reads per sample. (B) Histogram of tracked barcodes per gene in a typical BarSeq experiment. Median 7 barcodes per gene, 68,021 total barcodes in 6,558 genes. See supplementary file 1 for a full list of insert density by gene and orthologs reported as essential in model fungi.

**Figure 2 Supplement 2. Methionine, cysteine, and arginine biosynthesis pathways in *R. toruloides*.** (A) Sulfur amino acid biosynthesis in *R. toruloides* as inferred from enrichment experiments. CysA/CysB are named according to their *A. nidulans* orthologs, all others by orthologs in *S. cerevisiae*. Auxotrophic mutants had  $F < -1$  in nonsupplemented media and  $T < -3$  versus the methionine supplementation, drop-out complete or YPD cultures, with the exception of *MET8* which had  $T < -2$ . Multiple insertions were mapped in *STR3*, suggesting non-essentiality, but strain abundance was too low to reliably estimate fitness in BarSeq experiments. 5MTHTG: 5-methyltetrahydropteroyltri-L-glutamate, THTG: tetrahydropteroyltri-L-glutamate, SAM: S-adenosyl-L-methionine, SAH: S-adenosyl-homocysteine, APS: adenylyl-sulfate, PAPS: 3'-phosphoadenylyl-sulfate. (B) Arginine biosynthesis in *R. toruloides* as inferred from enrichment experiments. Gene names are based on orthologs in *S. cerevisiae*. NAG: N-acetylglutamate, NAGSA: N-acetylglutamate semialdehyde, NAAO: N-alpha-acetylornithine.

**Figure 3. Genes with fitness defects on fatty acids.** (A) Heatmap of fitness scores for *R. toruloides* genes with predicted roles in beta-oxidation of fatty acids. Enzyme classes and predicted locations were inferred from homologous proteins in *Ustilago maydis* as reported by Camoes et al (69). See supplementary file 2 for full fitness data. (B)  $\log_2$  optical density ratio for single deletion mutants versus the *YKU70* $\Delta$  control strain at mid-log phase on 1% oleic acid as carbon source are plotted against the fitness scores for each gene from BarSeq experiments on 1% oleic acid. (C)  $\log_2$  optical density ratio for single deletion mutants versus the *YKU70* $\Delta$  control strain at mid-log phase on 1% ricinoleic acid as carbon source are plotted against the fitness scores for mutants in each gene from BarSeq experiments on 1% ricinoleic acid.



The following figure supplements are available for Figure 3:

**Figure 3 Supplement 1. K-means clusters of fitness scores for 129 genes for which mutants have specific fitness defects on fatty acids.** Fitness scores for individual biological replicates were clustered in this analysis (6 replicates on glucose, 3 for each fatty acid). OA: oleic acid, RA: ricinoleic acid, MRA: methyl ricinoleic acid. Seven clusters were identified based on carbon utilization patterns; FA1 - fitness defects on all fatty acids, FA2 & FA3 - fitness defects on MRA and RA, FA4 & FA5 – fitness defects on RA only, FA6 – fitness defects on MRA only, and FA7 – fitness defects on OA only. Major categories of predicted gene functions are summarized for the clusters. See supplementary files 2 and 3 for full fitness data and gene ontology enrichments.

**Figure 3 Supplement 2. Model for beta-oxidation of fatty acids in *R. toruloides*.** Fitness scores for genes with predicted roles in mitochondrial and peroxisomal beta-oxidation are represented by the width of green or blue borders around each protein, with wider borders corresponding to lower fitness scores. Green and blue borders represent fitness on oleic and ricinoleic acid respectively. Fitness scores on fatty acids were consistently most severe for a few mitochondrial beta-oxidation genes, and an ortholog to the mammalian short-chain and branched short-chain acyl-CoA dehydrogenase *ACADSB* was the most important gene mediating that enzymatic step in the mitochondria. Fitness scores were more variable between different fatty acids for peroxisomal enzymes, for which more paralogs are present.

**Figure 3 Supplement 3. Extended growth curves for deletion mutants on fatty acids.** Growth curves for deletion mutants of (A) *RTO4\_14567* (similar to *H. sapiens ACAD11*), (B) *RTO4\_8963* (similar to *H. sapiens ACAD11*), and (C) *RTO4\_8673* (similar to *PEX11*) on 1% oleic acid and 1% ricinoleic acid as the sole carbon source.

**Figure 4. Detecting mutants with altered lipid accumulation.** (A) Lipid accumulation in *R. toruloides* under nitrogen limitation. DIC microscopy of *R. toruloides* grown in low nitrogen media for 40 hours and stained with BODIPY 493/503 to label lipid droplets. (B) Two strategies to enrich populations for high or low TAG content cells. (Top) Buoyant density separation on sucrose gradients. Lipid accumulated cells are loaded on to a linear sucrose gradient and centrifuged. Cells settle at their neutral buoyancy, with the size of the low-density lipid droplet as the main driver of buoyancy differences. The gradient is then split into several fractions, and fractions representing the most and least buoyant 5-10% of the population, as well as a no-separation control are subjected to DNA extraction and strain quantification with BarSeq. For each gene an enrichment score is calculated as the log ratio of mutant abundance in the high buoyancy versus low buoyancy fractions. (Bottom) FACS sorting on BODIPY signal. Cells cultured in lipid accumulation conditions (limited nitrogen) are stained with BODIPY 493/503, then sorted in a FACS system. The 10% of the population with the highest and lowest BODIPY signal are sorted into enriched populations, as well as non-gated control. These small populations (10 million cells each) are then cultured for additional biomass and subjected to DNA extraction and strain quantification with BarSeq. For each gene, a FACS enrichment score is calculated as the log ratio of mutant abundance in the high BODIPY versus low BODIPY fractions.

The following figure supplements are available for Figure 4:

**Figure 4 Supplement 1. Measuring lipid accumulation under nitrogen limitation.** (A) Total fatty acid methyl ester (FAME) content in *R. toruloides* cultures, quantified using gas chromatography and flame ion detection (GC-FID), correlates with average cellular BODIPY signal determined by flow cytometry. (B) Standards used for quantification of FAME content. Peak area/concentration ratios for ten commercially available fatty acid standards were used to quantify FAME peaks from experimental samples. (C) Example FAME profile for IFO 0880. Peak area/concentration ratios for C18:2 were used to quantify C18:3.

**Figure 4 Supplement 2. Lipid accumulation and buoyancy changes under nitrogen limitation.** (A) Time course of lipid accumulation (measured by BODIPY intensity) in nitrogen limited media (C/N 120; 12, 40, and 88 hours). Rich media control shown for comparison (YPD at 40 hours). Kernel Density plots for three biological replicates are shown for each growth condition. (B) Time course of buoyant density on sucrose gradients in nitrogen limited media (C/N 120; 12, 40, and 88 hours). Rich media control shown for comparison (YPD at 40 hours). Relative cell numbers were measured by OD 600 nm. Density was measured directly by weight of a 100  $\mu$ l sample.

**Figure 4 Supplement 3. Table of sucrose gradients used in this study.**

**Figure 5. RB-TDNAseq on enriched populations identifies genes affecting lipid accumulation.** (A) Hierarchical clusters of enrichment scores for 271 genes with significant enrichment ( $|E| > 1$ ,  $|T| > 3$ ) in high/low fractions separated by the buoyant density or FACS sorting of BODIPY stained cells after lipid accumulation on low nitrogen media. Enrichment scores for individual biological replicates (3 per condition) were clustered in this analysis. Eight major clusters were identified (LA1-LA8). See supplementary file 2 for full enrichment data. (B and C) Relative BODIPY signal for deletion mutants. Points are the average BODIPY/cell for 10,000 cells from independent biological replicate cultures normalized to three control *YKU70 $\Delta$*  cultures processed on the same day. Three biological replicates were processed for each strain in any given experiment and each strain was included in at least two experiments processed on different days. \*\*  $P < 0.01$ , \*  $P < 0.05$  by one-tailed homoscedastic T-test versus *YKU70 $\Delta$* . <sup>1</sup>Human homolog, <sup>2</sup>*C. neoformans* homolog, <sup>3</sup>*A. nidulans* homolog.

The following figure supplements are available for Figure 5:

**Figure 5. Supplement 1. tRNA thiolation in *S. cerevisiae* versus lipid accumulation in *R. toruloides*.** Relative levels of tRNA thiolation for *S. cerevisiae* mutants as reported by Huang et al(22) versus enrichment scores for orthologous *R. toruloides* genes in the FACS separation experiment after lipid accumulation. Low lipid content (i.e. negative enrichment scores) for *R. toruloides* mutants corresponds to lower levels of tRNA thiolation in *S. cerevisiae* mutants.

**Figure 6. Overview of *R. toruloides* lipid metabolism.** Key metabolic pathways and cellular functions mediating lipid metabolism as identified from fitness scores on fatty acid and enrichment scores from lipid accumulation screens. Fitness and/or enrichment scores for individual genes are depicted graphically by relative size of hexagonal, circular or star icons

respectively. Only fitness scores for genes with significant growth defects on at least one fatty acid (see supplementary file 2) and enrichment scores from high confidence clusters (see Figure 5 and supplementary file 2) are shown. Enrichment scores were averaged between buoyancy and FACS experiments, except for genes with confounding enrichment scores in rich media conditions, for which only FACS data were averaged. Positive scores (orange circles) represent genes for which mutants have increased lipid accumulation. Negative fitness scores (blue stars) represent genes for which mutants have decreased lipid accumulation. Genes detected in proteomics of *R. toruloides* lipid droplets by Zhu et al (*RAC1*, *GUT2*, *PLIN1*, *EGH1*, *RIP1*, *MGL2*, *AAT1*, *CIR2*, *MLS1*, and *RTO4\_8963*) or found in lipid droplet of many organisms (*DGA1* and *BSCL2*)(see Supplementary File 5) are depicted under “Lipid Droplet” and also their molecular functions, e.g. “G Protein Switches” for *RAC1*.

The following figure supplements are available for Figure 6:

**Figure 6. Supplement 1. Genes directly effecting TAG biosynthesis in *R. toruloides*.**

Model pathway illustrating genes involved in glycolysis, triacylglyceride (TAG) synthesis, and cytosolic NAD<sup>+</sup>/NADH balance during TAG synthesis. Genes for which mutants had altered lipid accumulation (enrichment scores in clusters LA1, LA6, LA7, or LA8) are highlighted in orange or blue. Genes with low rates of T-DNA insertion (essential genes and genes for which mutants have a strong growth defect) are highlighted in gray. The primary source of NADPH in *R. toruloides* remains unclear (see supplementary text for detail). Speculative pathways mediating NADPH production are indicated with dashed gray arrows. DAG: diacylglycerol, PA: phosphatidic acid, LPA: lysophosphatidic acid, G3P: glycerol-3-phosphate, DHAP: dihydroxyacetone-phosphate, GADP: glycerate 3-phosphate, 1,3BPG: 1,3-bisphosphoglycerate, 3PG: 3-phosphoglycerate, 2PG: 2-phosphoglycerate, PEP: phosphoenolpyruvate, OAA: oxaloacetate

**Figure 7. Light and fluorescence microscopy images of selected lipid accumulation mutants.**

DIC microscopy on eight deletion mutants for lipid accumulation genes. All deletion mutants (C-J) were constructed in a *YKU70*Δ background to enable homologous recombination at the targeted locus. Cells were grown 40 hours in low nitrogen lipid accumulation media. DIC, BODIPY 493/503 fluorescence, and composite images are shown for ten strains. (A) *R. toruloides* IFO 0880 (WT). (B) *RTO4\_11920*Δ ortholog of *YKU70*. (C) *RTO4\_11043*Δ similar to *H. sapiens BSCL2*. (D) *RTO4\_14088*Δ ortholog of *H. sapiens RAC1*. (E) *RTO4\_10371*Δ similar to *H. sapiens KDELC1*. (F) *RTO4\_16215*Δ similar to *H. sapiens GNAI1*. (G) *RTO4\_8709*Δ ortholog of *MET14*. (H) *RTO4\_16381*Δ similar to *H. sapiens PLIN1*. (I) *RTO4\_13598*Δ ortholog of *ATG2*. (J) *RTO4\_12154*Δ ortholog of *GPD1*.

The following figure supplements are available for Figure 7:

**Figure 7 Supplement 1. Additional light and fluorescence microscopy images.**

DIC microscopy on 21 deletion mutants for lipid accumulation genes. All deletion mutants (C-W) were constructed in a *YKU70*Δ background to enable homologous recombination at the targeted locus. Cells were grown 40 hours in low nitrogen lipid accumulation media. DIC, BODIPY 493/503 fluorescence, and composite images are shown for 23 strains. (A) *R. toruloides* IFO 0880 (WT). (B) *RTO4\_11920*Δ ortholog of *YKU70*. (C) *RTO4\_11272*Δ ortholog of *ALG12*. (D) *RTO4\_8709*Δ ortholog of *MET14*. (E) *RTO4\_12031*Δ ortholog of *A. nidulans*

CysB. (F) RTO4\_16215 $\Delta$  similar to *H. sapiens* GNA1. (G) RTO4\_14088 $\Delta$  ortholog of *H. sapiens* RAC1. (H) RTO4\_10371 $\Delta$  similar to *H. sapiens* KDELC1. (I) RTO4\_16644 $\Delta$  ortholog of BMH1. (J) RTO4\_16731 $\Delta$  ortholog of ERP2. (K) RTO4\_9026 $\Delta$  ortholog of UBP13. (L) RTO4\_15890 $\Delta$  similar to *H. sapiens* MYCL. (M) RTO4\_8506 $\Delta$  ortholog of CCC1. (N) RTO4\_12817 $\Delta$  ortholog of NCS6. (O) RTO4\_10764 $\Delta$  ortholog of NCS2. (P) RTO4\_9970 $\Delta$  ortholog of LDB17. (Q) RTO4\_13598 $\Delta$  ortholog of ATG2. (R) RTO4\_16381 $\Delta$  similar to *H. sapiens* PLIN1. (S) RTO4\_12154 $\Delta$  ortholog of GPD1. (T) RTO4\_11043 $\Delta$  similar to *H. sapiens* BSCL2. (U) RTO4\_12121 $\Delta$  ortholog of PMT4. (V) RTO4\_10302 $\Delta$  similar to *C. neoformans* CMT1. (W) RTO4\_11380 $\Delta$  ortholog of PPZ1.

**Table 1. Predicted gene function: Mutants with increased lipid accumulation.** Predicted functions for genes for which mutants were high-confidence candidates for increased lipid accumulation (enrichment scores clustered in LA1, Figure 5). Cellular processes grouped as in Figure 6. BD: Enrichment score from buoyant density separation. FACS: Enrichment score from fluorescence activated cell sorting. ^ Protein abundance increased under nitrogen limitation Zhu et al 2012 (8). ^^ Protein abundance increase 10-fold or more. v Protein abundance decreased. vv Protein abundance decreased 10-fold or more.

**Table 2. Predicted gene function: Mutants with decreased lipid accumulation.** Predicted functions for genes for which mutants were high-confidence candidates for decreased lipid accumulation (enrichment scores clustered in LA6 - LA8, Figure 5). Cellular processes grouped as in Figure 6. BD: Enrichment score from buoyant density separation. FACS: Enrichment score from fluorescence activated cell sorting. ^ Protein abundance increased under nitrogen limitation Zhu et al 2012 (8). ^^ Protein abundance increase 10-fold or more. v Protein abundance decreased. vv Protein abundance decreased 10-fold or more.

Figure 1

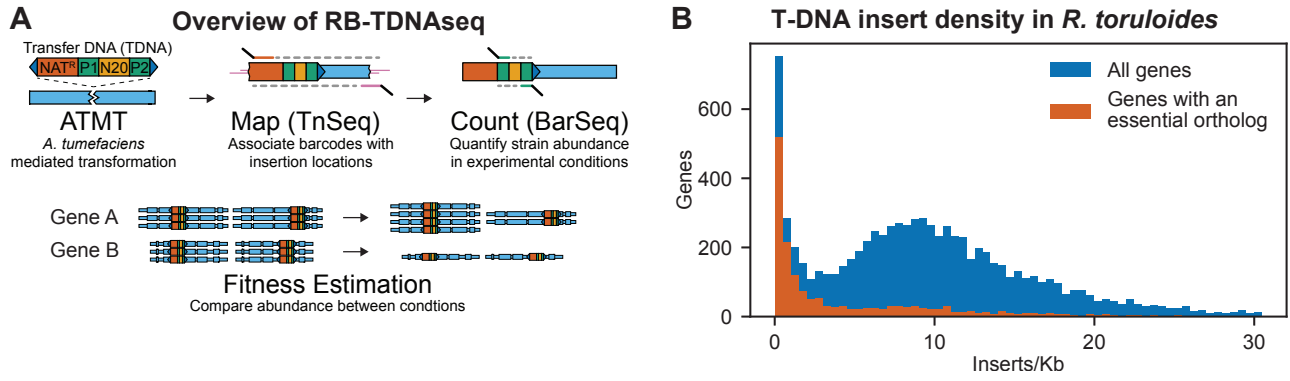

## Figure 1 Supplement 1

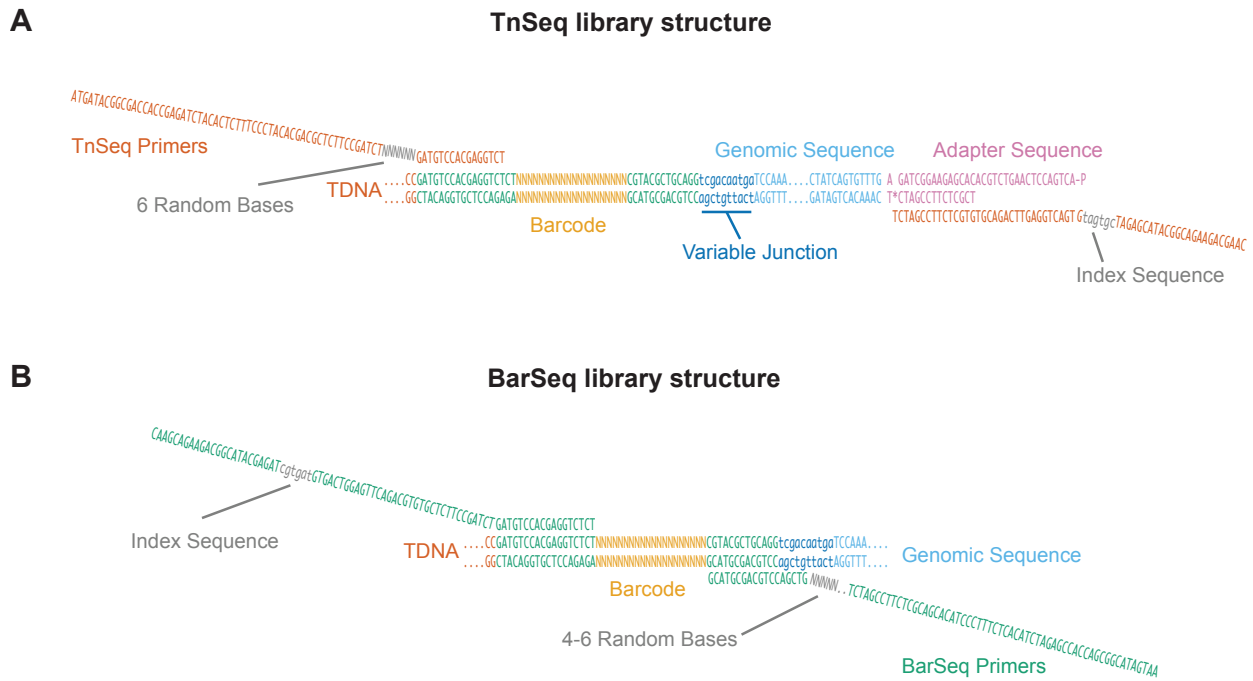

## Figure 1 Supplement 2

### A Observed types of T-DNA insertions

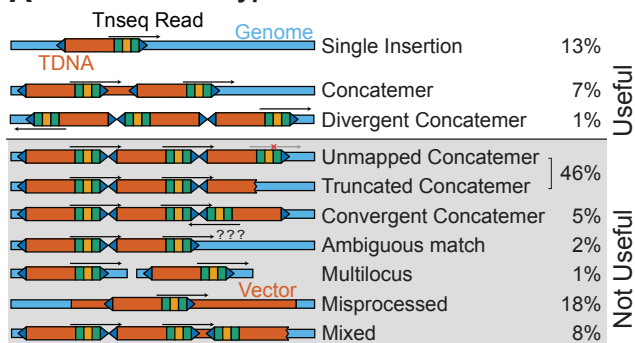

### B Sanger traces from individual colonies

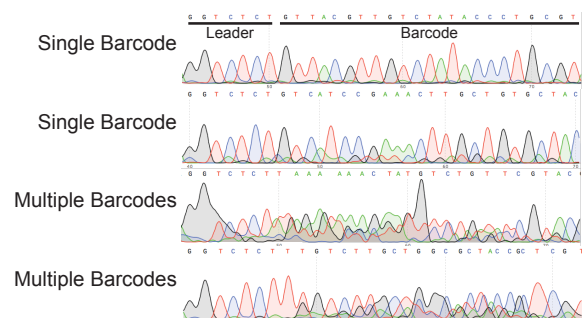



Figure 1 Supplement 3

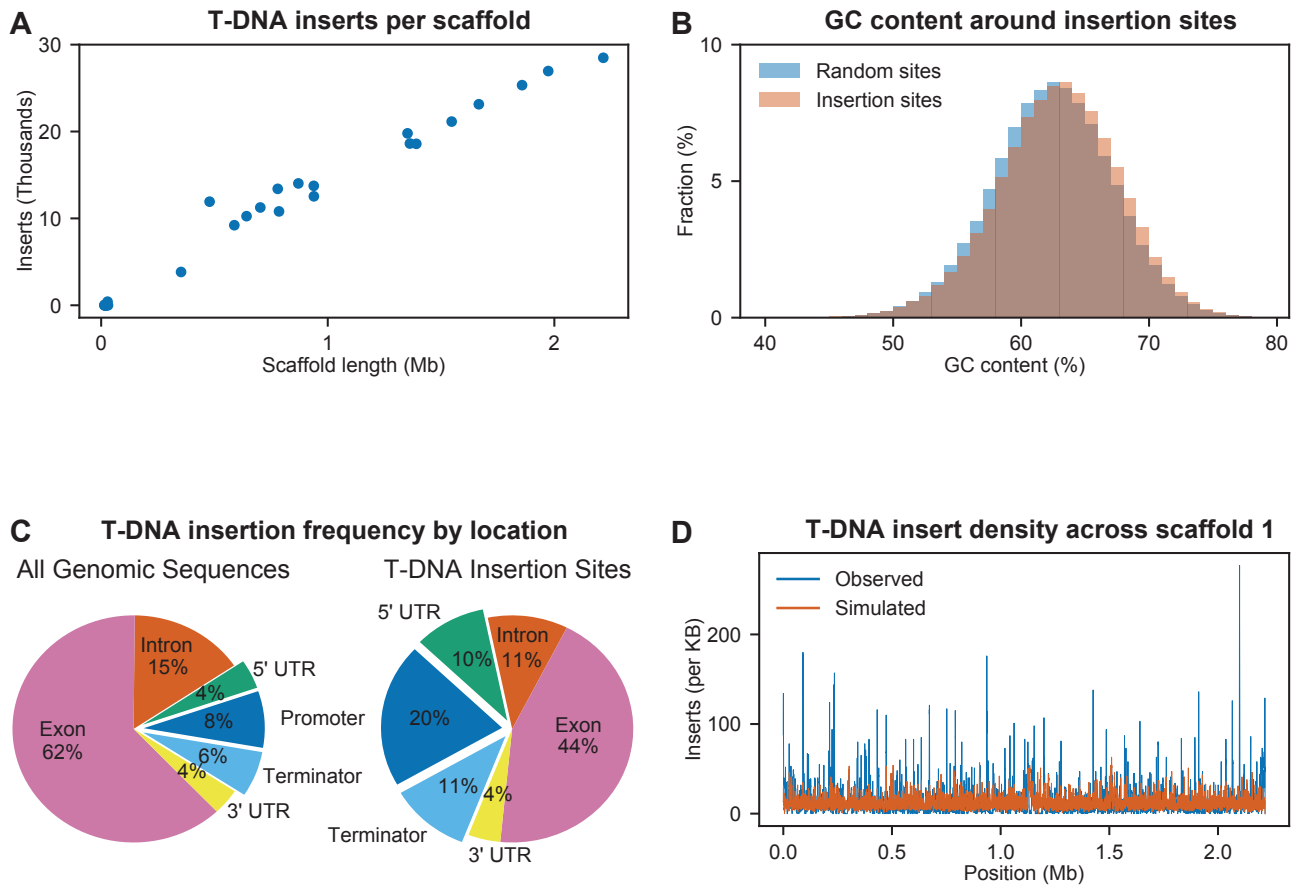

Figure 2

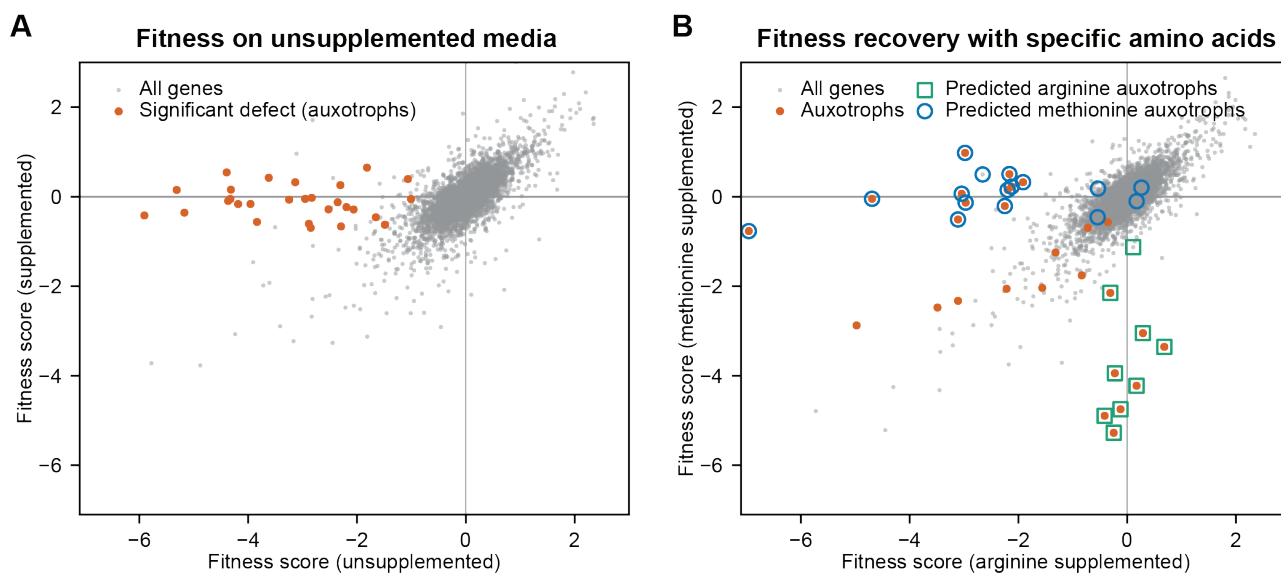

## Figure 2 Supplement 1

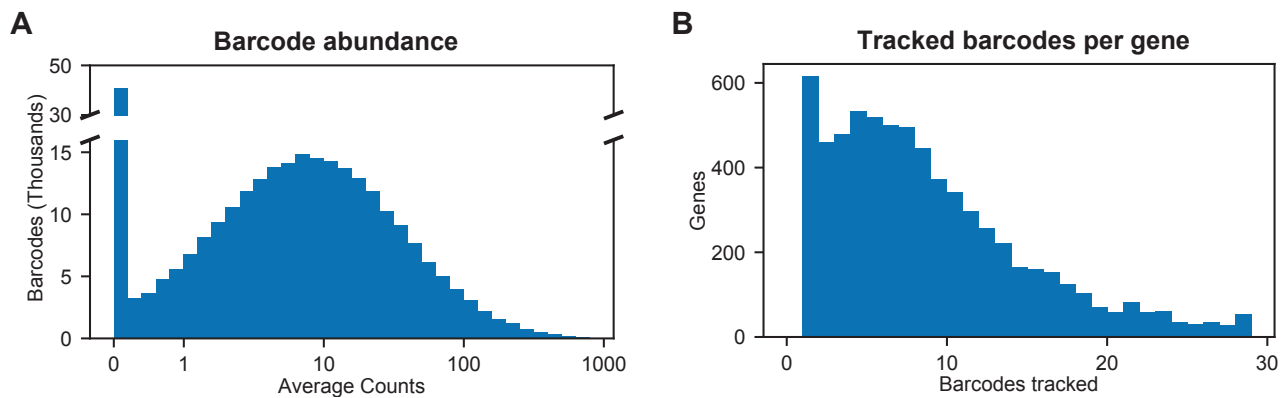

## Figure 2 Supplement 2

### A Sulfur amino acid biosynthesis in *R. toruloides*

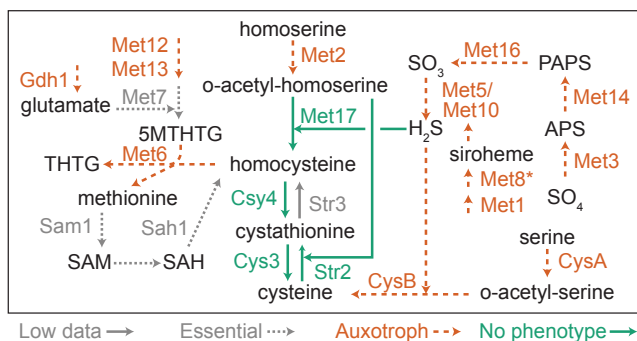

### B Arginine biosynthesis in *R. toruloides*

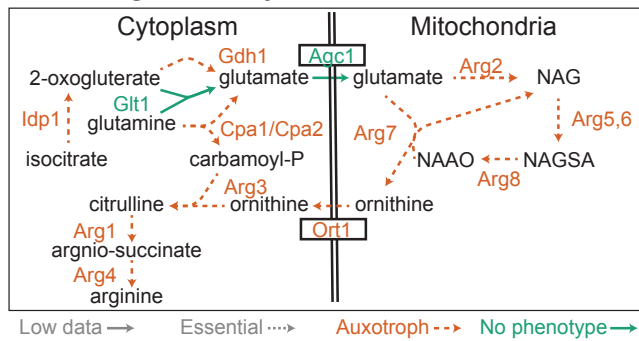

Figure 3

**A Genes with predicted function in  $\beta$ -oxidation**

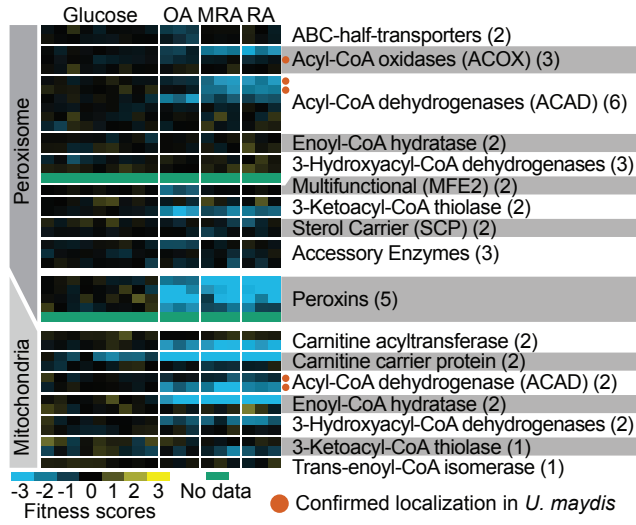

**B Oleic acid**

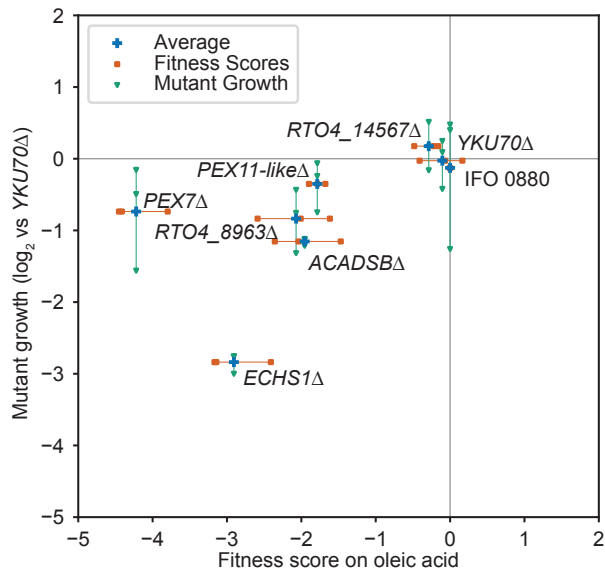

**C Ricinoleic acid**

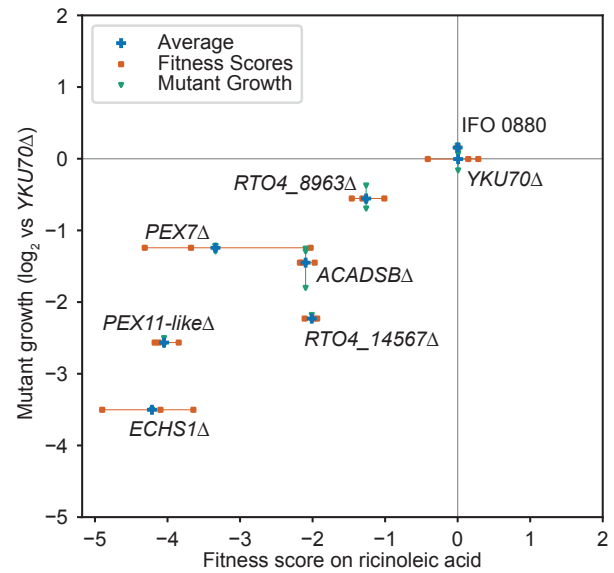

Figure 3 Supplement 1

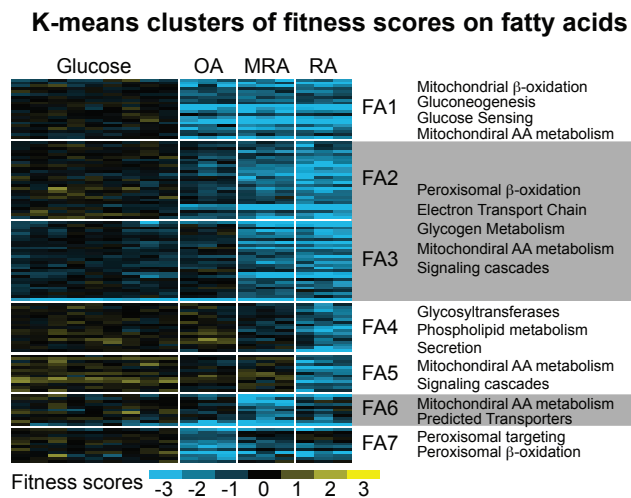

Figure 3 Supplement 2

**GENE1** Fitness Defect on Oleic Acid  
**GENE2** Fitness Defect on Ricinoleic Acid

**GENE3** Essential Gene

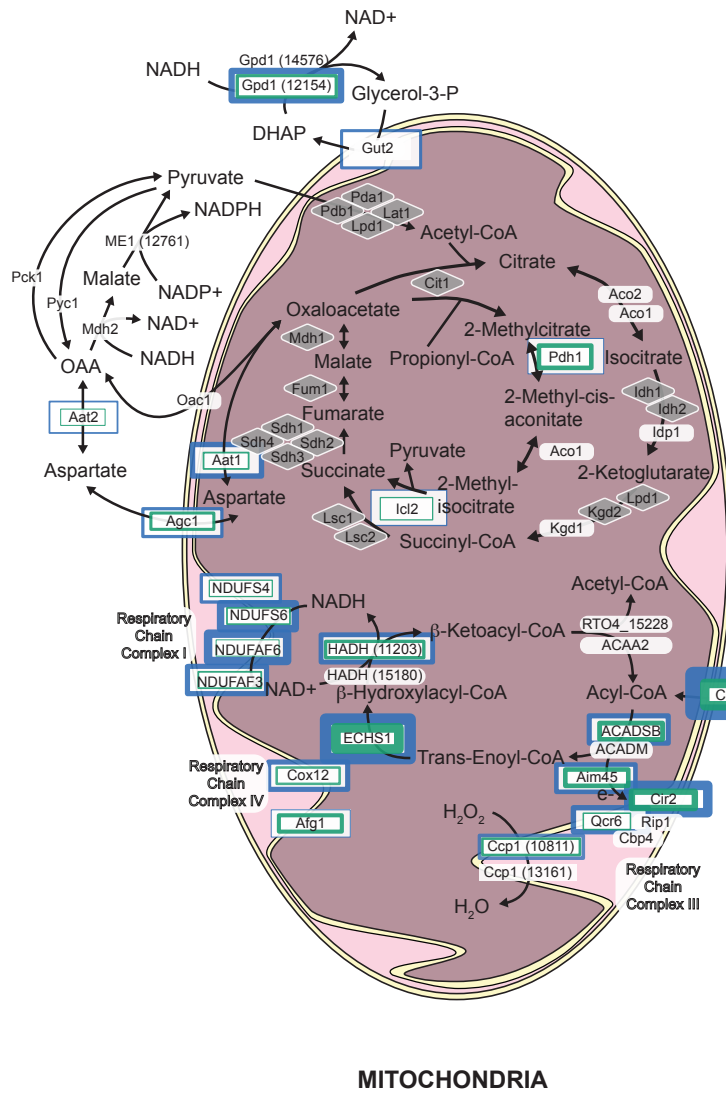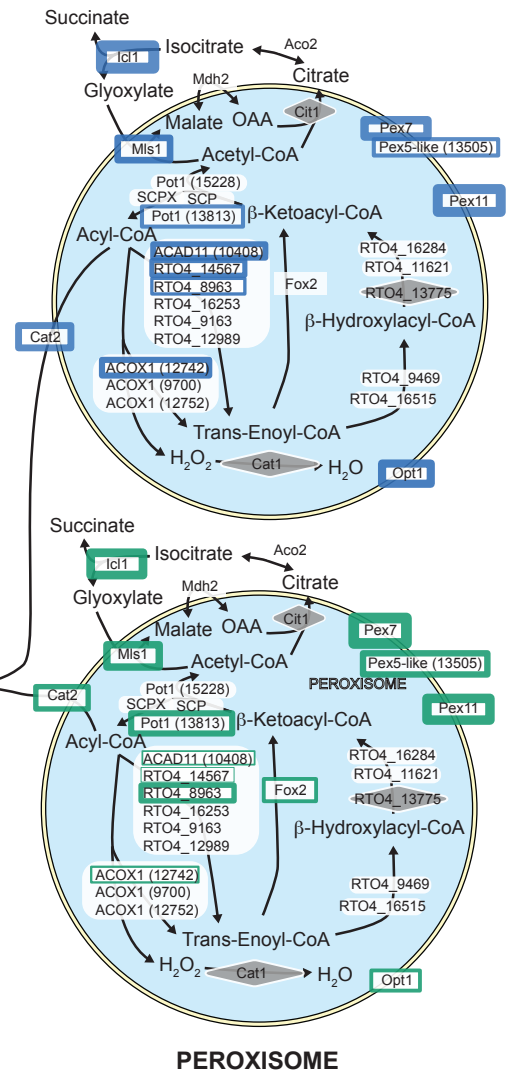

### Figure 3 Supplement 3

**A**

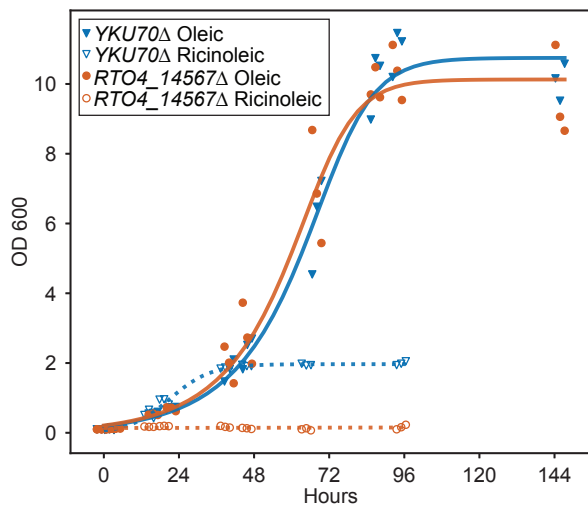

**B**

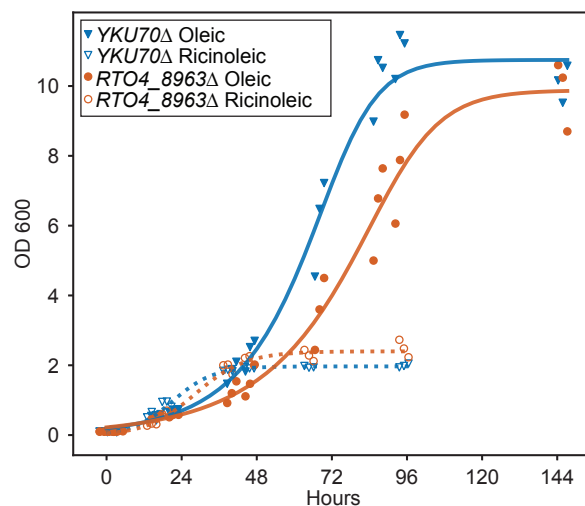

**C**

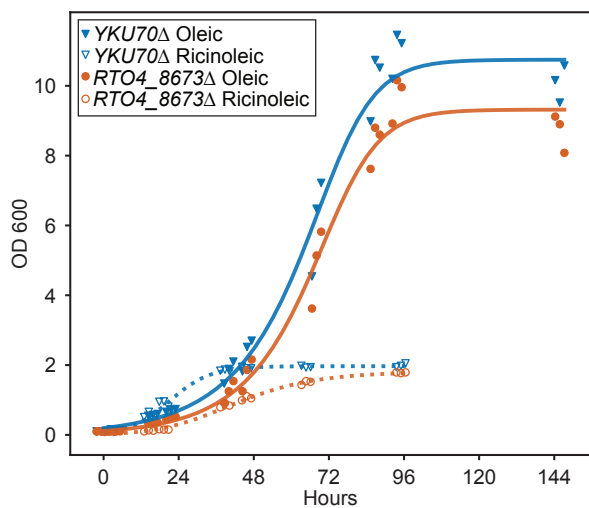



Figure 4

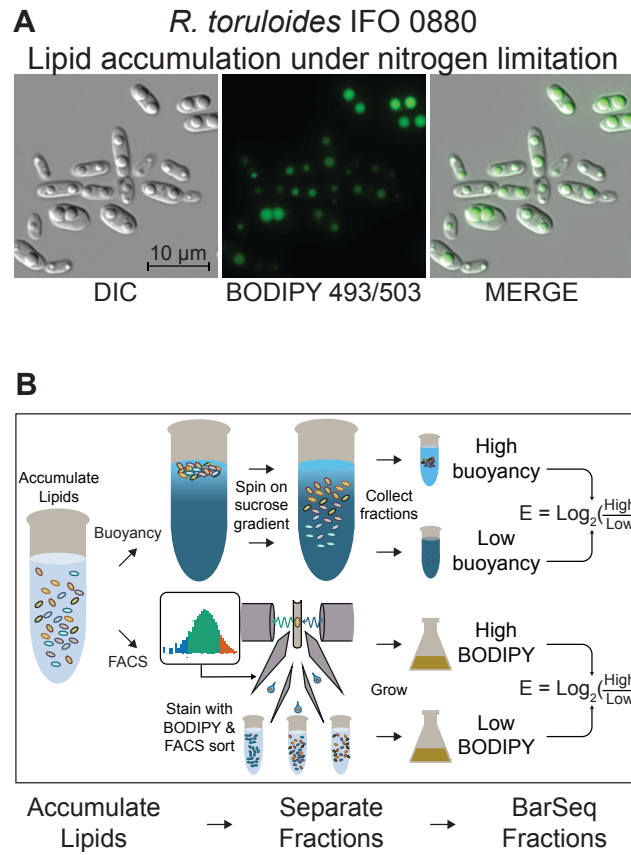

Figure 4 Supplement 1

**A** BODIPY signal as a measure of fatty acid content

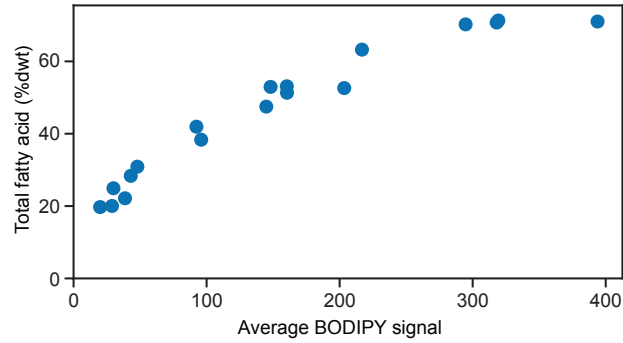

**B** Standards used for calibration

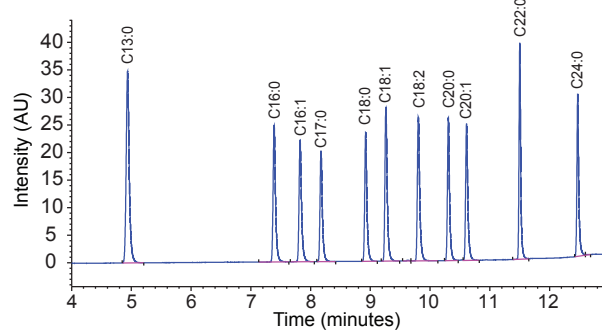

**C** FAME profile for wild type IFO 0880

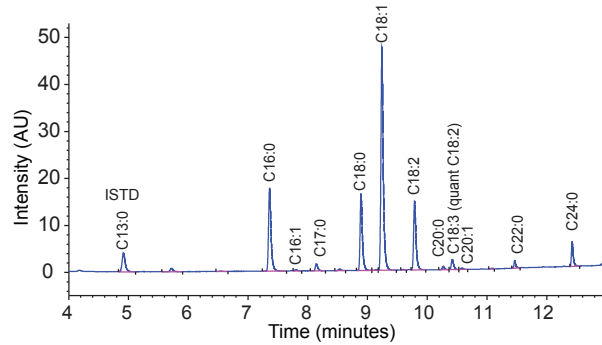

Figure 4 Supplement 2

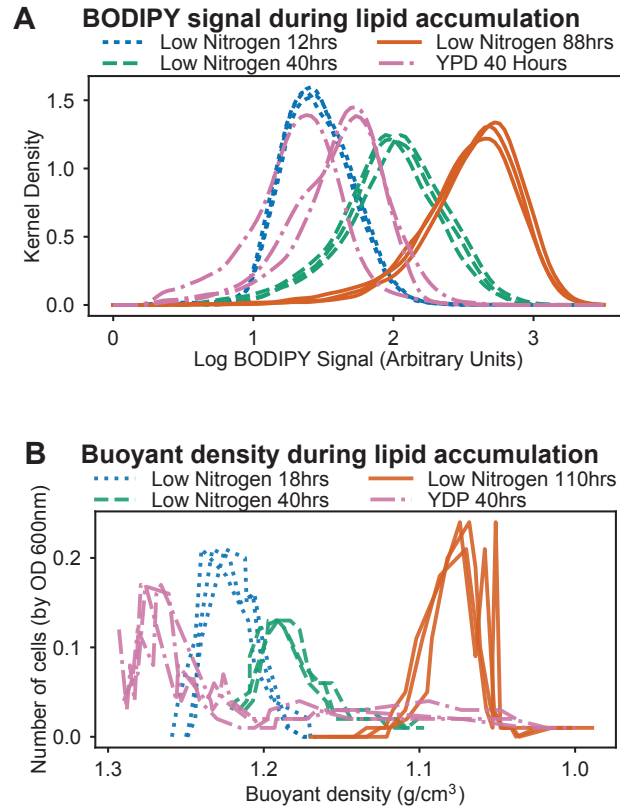

### Figure 4 Supplement 3

**Table of sucrose density gradients used in this study**

| <b>Media</b> | <b>Time</b> | <b>Sucrose Range (Density)<sup>A</sup></b> | <b>Average Density +/-StDev</b> | <b>High Buoyancy Fractions (Density)</b> | <b>Median Buoyancy Fractions (Density)</b> | <b>Low Buoyancy Fractions (Density)</b> |
|--------------|-------------|--------------------------------------------|---------------------------------|------------------------------------------|--------------------------------------------|-----------------------------------------|
| Low Nitrogen | 40 hr       | 50% - 20%<br>(1.22 - 1.10)                 | 1.177<br>+/-0.003               | 17 - 20<br>(<1.11)                       | 6 - 7<br>(1.18-1.19)                       | 1 - 2<br>(>1.21)                        |
| YPD          | 40 hr       | 80% - 50%<br>(1.29 - 1.16)                 | 1.234<br>+/-0.012               | 19 - 22 <sup>B</sup><br>(< 1.14)         | 4 - 8 <sup>B</sup><br>(1.24-1.27)          | 1<br>(>1.28)                            |

All density measurements in g/mL

<sup>A</sup>Highest and lowest specific density measured in collected fraction in the linear portion of the gradient.

<sup>B</sup>Some biological replicates differ in exact fractions collected. Fractions were collected within this range such the high buoyancy fraction constituted the most buoyant 5-10% of the population, the median buoyancy fraction constituted the median 30-50% of the population and the low buoyancy fraction constituted the least buoyant 5-10% of the population.

**Figure 5**

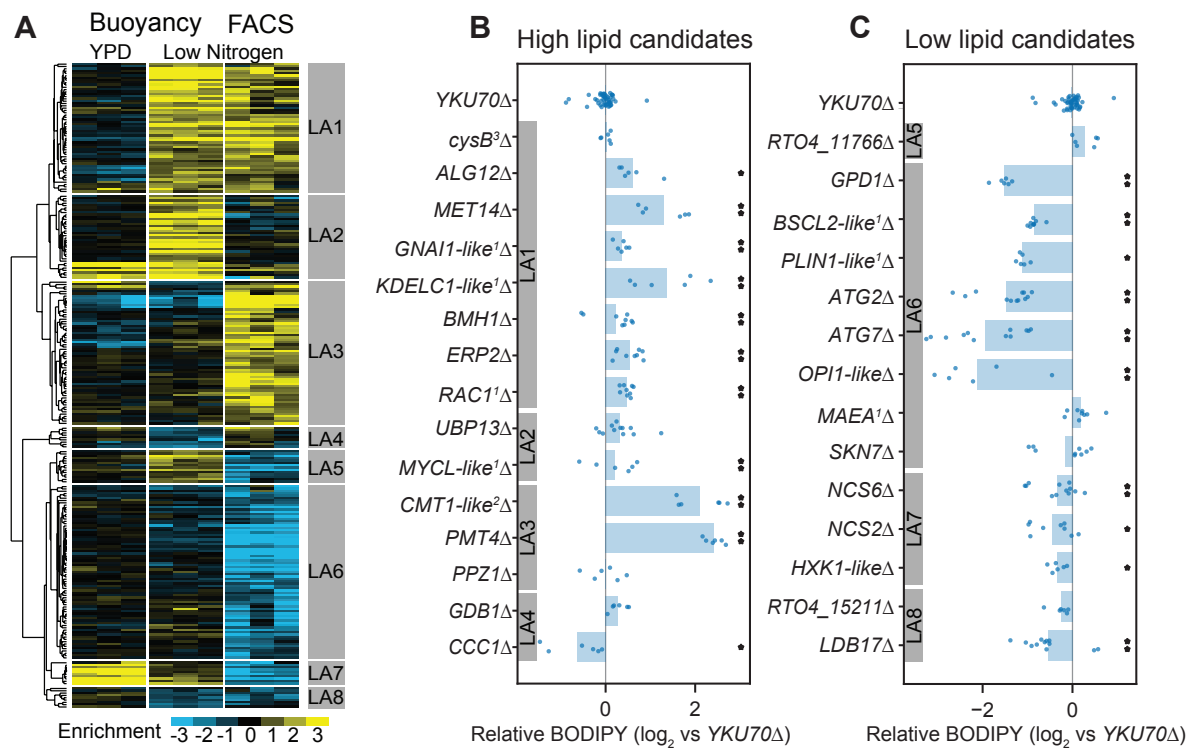

## Figure 5 Supplement 1

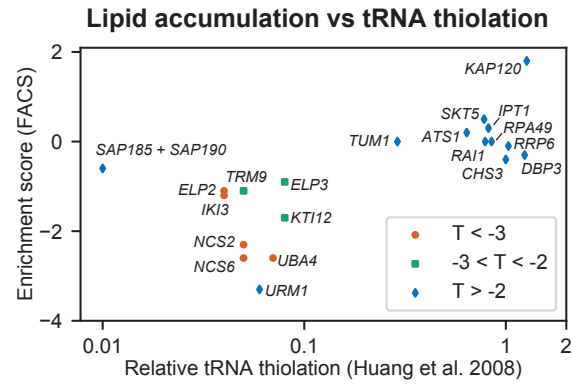

Figure 6

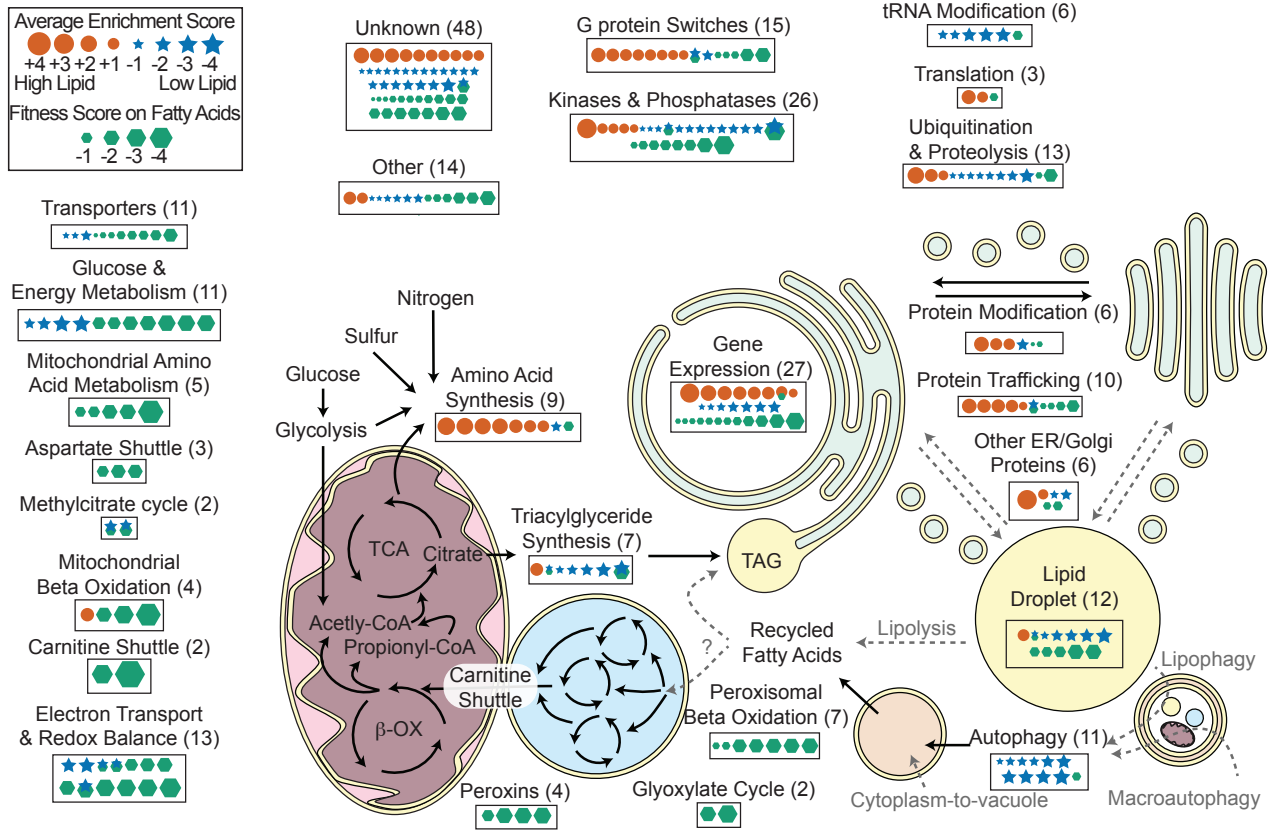

Figure 6 Supplement 1

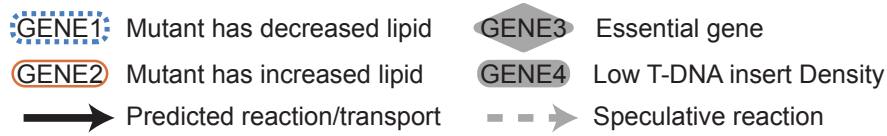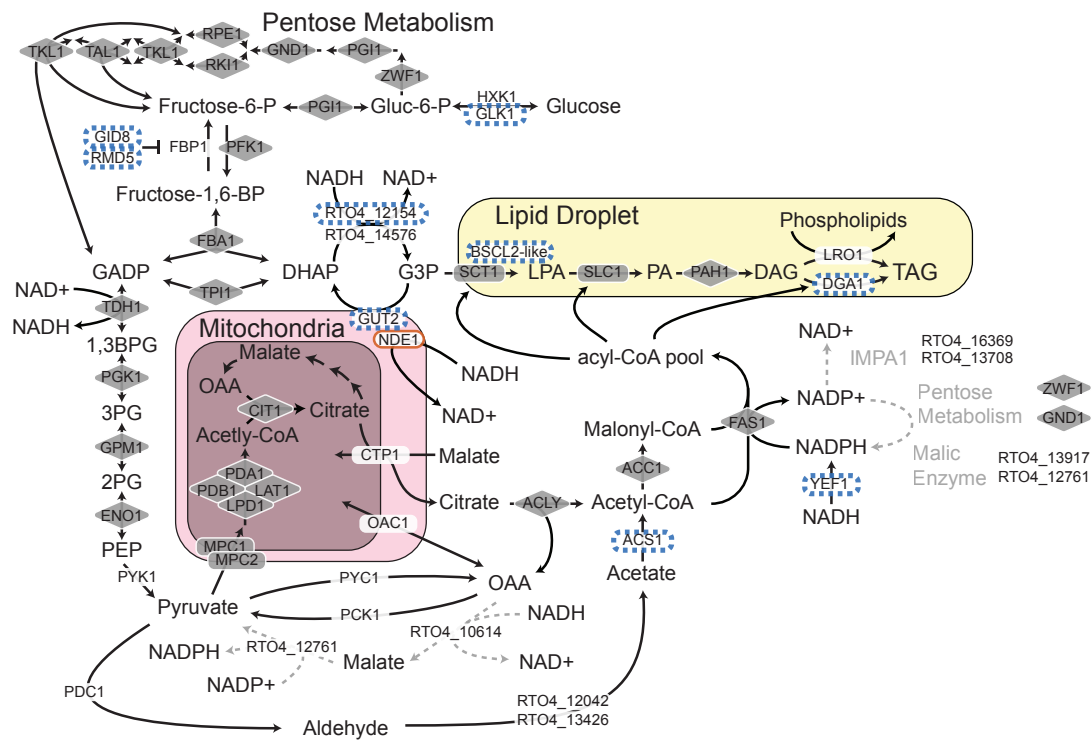



Figure 7

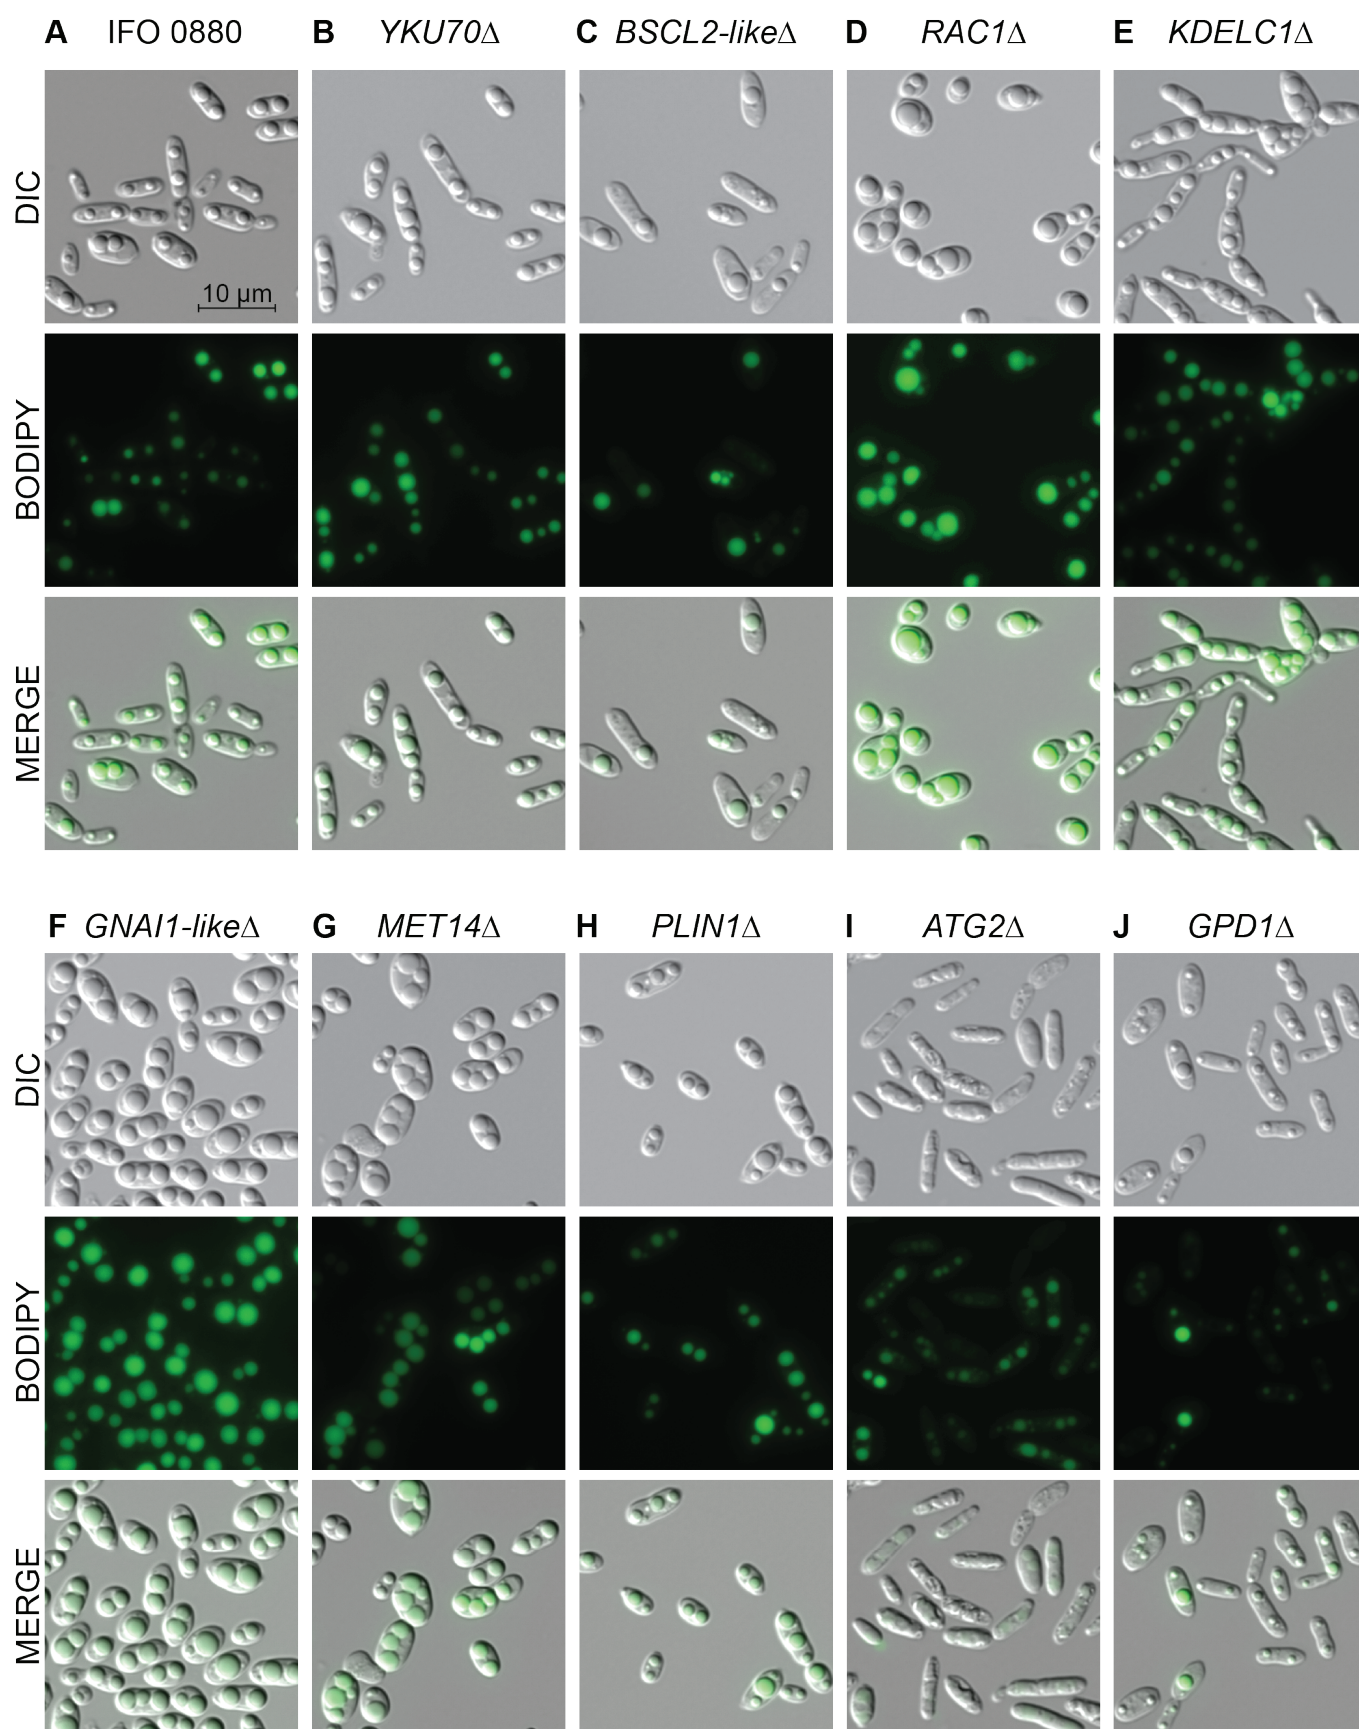

Figure 7 - Supplement 1

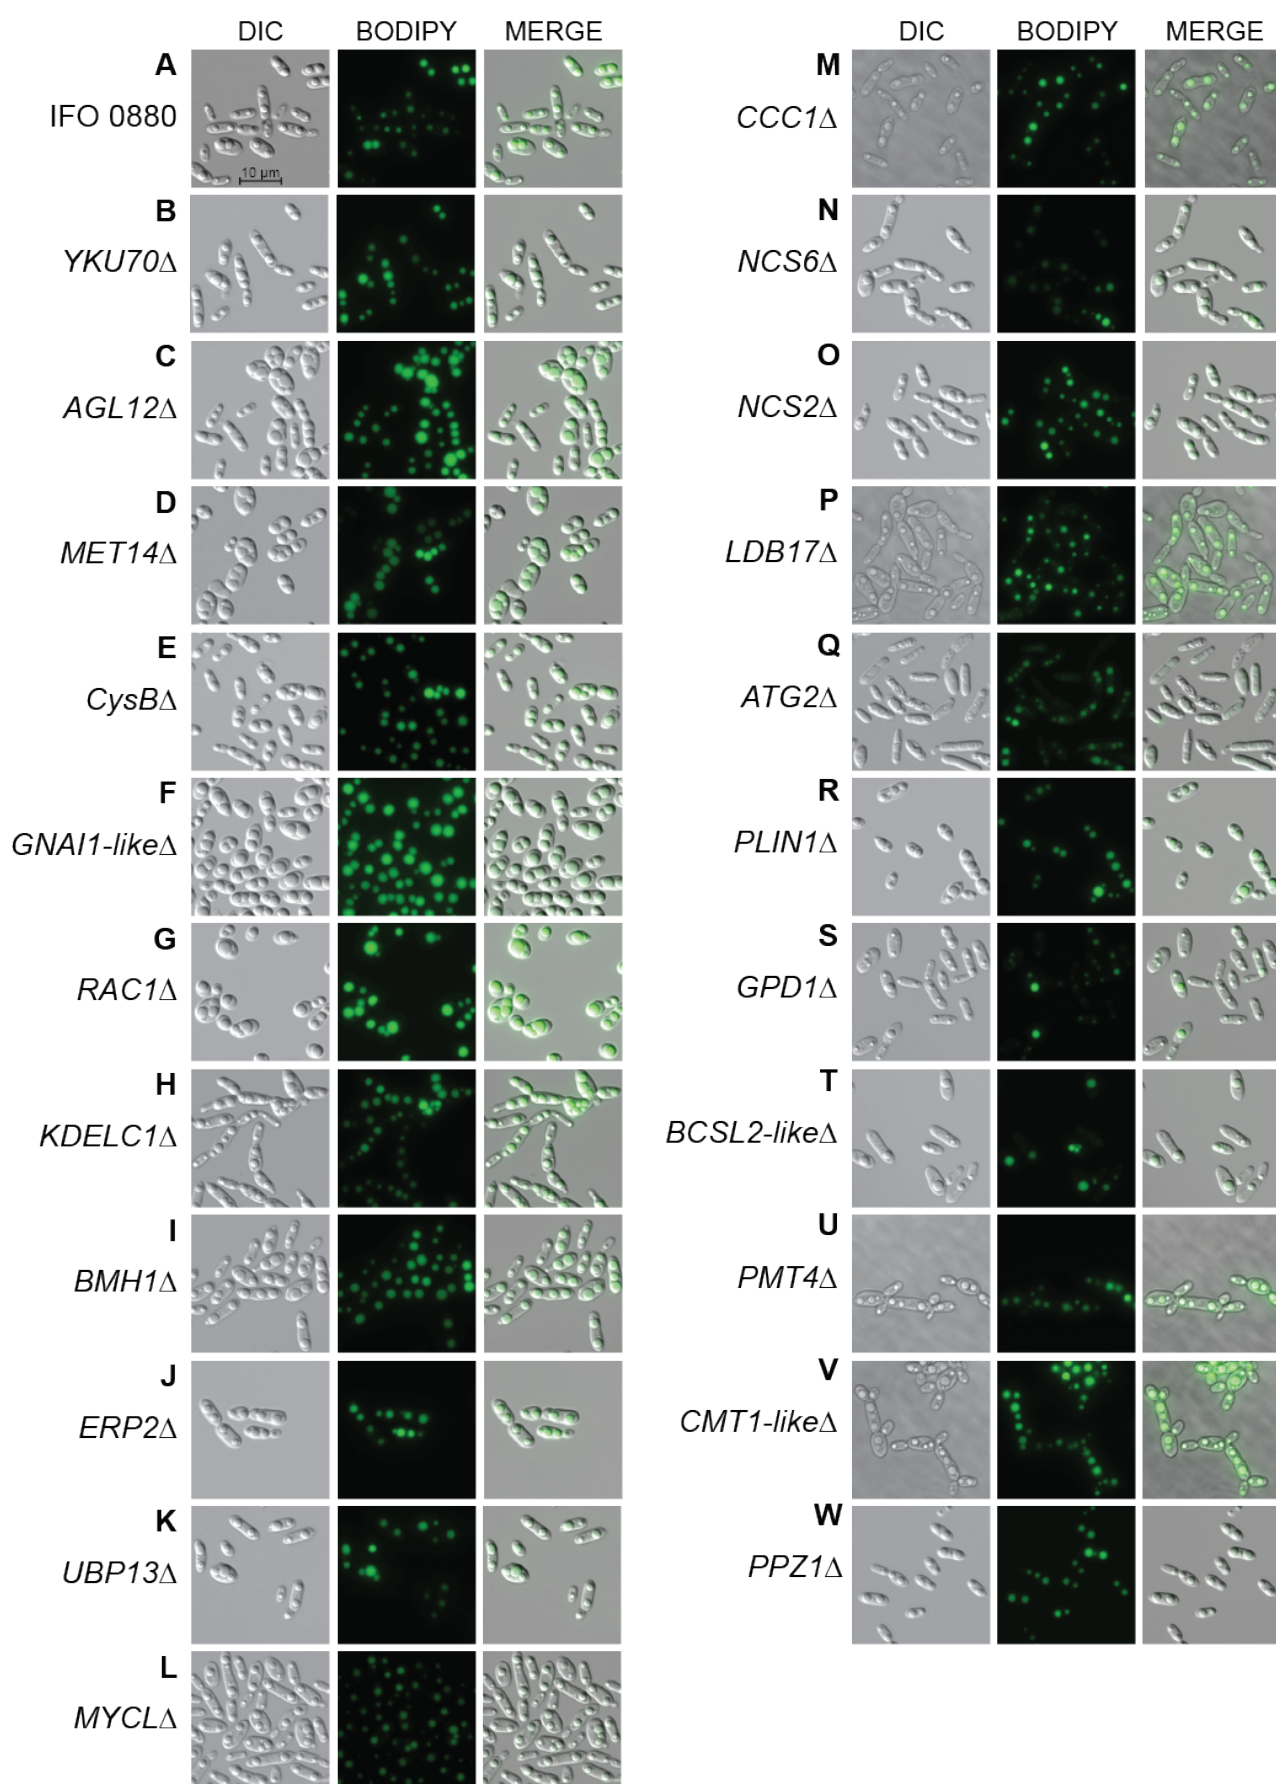

**Table 1. Predicted gene function: Mutants with increased lipid accumulation (Cluster LA1)**

| Gene ID                           | Short Name | Annotation From        | Description                                  | Enrichment |      |
|-----------------------------------|------------|------------------------|----------------------------------------------|------------|------|
|                                   |            |                        |                                              | BD         | FACS |
| <b>G Protein Switches</b>         |            |                        |                                              |            |      |
| <sup>^</sup> RTO4_15883           | RAS1       | <i>S. cerevisiae</i>   | GTPase                                       | 2.0        | 2.3  |
| RTO4_14088                        | RAC1       | <i>H. sapiens</i>      | GTPase                                       | 2.0        | 0.9  |
| <sup>^</sup> RTO4_16215           | GNAI1-like | <i>H. sapiens</i>      | GTPase                                       | 1.6        | 1.0  |
| RTO4_11402                        | gapA       | <i>A. nidulans</i>     | GTPase-activating protein                    | 0.6        | 1.4  |
| RTO4_13336                        | RIC8A      | <i>H. sapiens</i>      | Guanine nucleotide exchange factor           | 1.3        | 1.4  |
| RTO4_16170                        | sif-like   | <i>D. melanogaster</i> | Guanine nucleotide exchange factor           | 1.5        | 0.9  |
| RTO4_16644                        | BMH1       | <i>S. cerevisiae</i>   | 14-3-3 protein                               | 1.3        | 2.2  |
| RTO4_16068                        | BMH1       | <i>S. cerevisiae</i>   | 14-3-3 protein                               | 0.7        | 1.2  |
| <b>Kinases &amp; Phosphatases</b> |            |                        |                                              |            |      |
| RTO4_13246                        | CNA1       | <i>S. cerevisiae</i>   | Phosphatase (Calcineurin catalytic subunit)  | 0.8        | 1.2  |
| RTO4_11675                        | CNB1       | <i>S. cerevisiae</i>   | Phosphatase (Calcineurin regulatory subunit) | 1.1        | 1.2  |
| RTO4_11667                        | PTC1       | <i>S. cerevisiae</i>   | Phosphatase                                  | 0.9        | 1.2  |
| RTO4_10638                        | CLA4       | <i>S. cerevisiae</i>   | Kinase                                       | 3.4        | 4.5  |
| <sup>^</sup> RTO4_16605           | TPK1       | <i>S. cerevisiae</i>   | Kinase                                       | 1.1        | 0.5  |
| <b>Gene Expression</b>            |            |                        |                                              |            |      |
| RTO4_10333                        | SET1       | <i>S. cerevisiae</i>   | Chromatin modifying                          | 3.0        | 1.1  |
| RTO4_10279                        | BRE2       | <i>S. cerevisiae</i>   | Chromatin modifying                          | 2.5        | 1.0  |
| RTO4_12689                        | SPP1       | <i>S. cerevisiae</i>   | Chromatin modifying                          | 2.0        | 1.3  |
| RTO4_15412                        | RCO1       | <i>S. cerevisiae</i>   | Chromatin modifying                          | 3.5        | 1.6  |
| RTO4_10209                        | MIT1-like  | <i>S. cerevisiae</i>   | Transcription factor                         | 1.4        | 0.3  |
| RTO4_14550                        | CYC8       | <i>S. cerevisiae</i>   | Transcription factor                         | 3.7        | 3.8  |
| RTO4_10274                        | SKN7-like  | <i>S. cerevisiae</i>   | Transcription factor                         | 2.2        | 1.5  |
| RTO4_13346                        | CBC2       | <i>S. cerevisiae</i>   | RNA splicing factor                          | 1.6        | 1.2  |
| <b>Protein Modification</b>       |            |                        |                                              |            |      |
| RTO4_11272                        | ALG12      | <i>S. cerevisiae</i>   | Alpha-1,6-mannosyltransferase                | 3.5        | 1.7  |
| RTO4_14881                        | CAP10-like | <i>C. neoformans</i>   | Xylosyltransferase                           | 1.5        | 2.0  |
| RTO4_16598                        | LARGE1     | <i>H. sapiens</i>      | Acetylglucosaminyltransferase-Like Protein   | 1.8        | 1.3  |
| <b>Protein Trafficking</b>        |            |                        |                                              |            |      |
| RTO4_12145                        | ERP1       | <i>S. cerevisiae</i>   | COPII cargo adapter protien (p24 family)     | 2.4        | 2.7  |
| RTO4_16731                        | ERP2       | <i>S. cerevisiae</i>   | COPII cargo adapter protien (p24 family)     | 1.7        | 2.0  |
| RTO4_12521                        | EMP24      | <i>S. cerevisiae</i>   | COPII cargo adapter protien (p24 family)     | 1.9        | 2.4  |
| RTO4_14054                        | BST1       | <i>S. cerevisiae</i>   | GPI inositol deacylase                       | 1.5        | 0.2  |
| <sup>^</sup> RTO4_15883           | RAS1       | <i>S. cerevisiae</i>   | GTPase                                       | 2.0        | 2.3  |
| <b>Other ER/Golgi Proteins</b>    |            |                        |                                              |            |      |
| RTO4_10371                        | KDEL1-like | <i>H. sapiens</i>      | Endoplasmic reticulum protein EP58           | 3.1        | 6.0  |
| RTO4_15763                        |            |                        | SH3 Domian-containing ER Protein             | 1.0        | 1.5  |
| <b>Amino Acid Biosynthesis</b>    |            |                        |                                              |            |      |
| RTO4_11050                        | MET1       | <i>S. cerevisiae</i>   | Uroporphyrinogen III transmethylase          | 3.8        | 2.0  |
| RTO4_8744                         | MET5       | <i>S. cerevisiae</i>   | Sulfite reductase                            | 4.4        | 2.1  |
| <sup>w</sup> RTO4_10374           | MET10      | <i>S. cerevisiae</i>   | Sulfite reductase                            | 2.5        | 1.3  |
| RTO4_8709                         | MET14      | <i>S. cerevisiae</i>   | Adenylylsulfate kinase                       | 4.1        | 1.1  |
| RTO4_11741                        | MET16      | <i>S. cerevisiae</i>   | Phosphoadenosine phosphosulfate reductase    | 1.7        | 1.1  |
| RTO4_12031                        | cysB       | <i>A. nidulans</i>     | Cysteine synthase A                          | 3.3        | 2.1  |
| <sup>^</sup> RTO4_16196           | ARG1       | <i>S. cerevisiae</i>   | Argininosuccinate synthase                   | 1.3        | 1.8  |

**Table 1. Predicted gene function: Mutants with increased lipid accumulation (Cluster LA1) (continued)**

| Gene ID                               | Short Name       | Annotation From      | Description                                     | Enrichment BD | FACS |
|---------------------------------------|------------------|----------------------|-------------------------------------------------|---------------|------|
| <b>Translation</b>                    |                  |                      |                                                 |               |      |
| <i>RTO4_12273</i>                     | <i>MRN1</i>      | <i>S. cerevisiae</i> | RNA-binding protein                             | 2.5           | 1.6  |
| <i>RTO4_8595</i>                      | <i>EIF4E2</i>    | <i>H. sapiens</i>    | Translation initiation factor                   | 2.0           | 0.5  |
| <b>Ubiquitination and Proteolysis</b> |                  |                      |                                                 |               |      |
| <i>RTO4_11150</i>                     | <i>Mub1-like</i> | <i>S. cerevisiae</i> | Ubiquitin ligase complex member                 | 3.8           | 2.0  |
| <i>RTO4_15576</i>                     | <i>CDC4</i>      | <i>S. cerevisiae</i> | Ubiquitin ligase complex member                 | 1.7           | 1.8  |
| <b>Triacylglyceride Synthesis</b>     |                  |                      |                                                 |               |      |
| <sup>^^</sup> <i>RTO4_8972</i>        | <i>NDE1</i>      | <i>S. cerevisiae</i> | NAD(P)H dehydrogenase (external)                | 1.6           | 1.9  |
| <b>Lipid Droplet Associated</b>       |                  |                      |                                                 |               |      |
| <i>RTO4_14088</i>                     | <i>RAC1</i>      | <i>H. sapiens</i>    | GTPase                                          | 2.0           | 0.9  |
| <b>Mitochondrial Beta-oxidation</b>   |                  |                      |                                                 |               |      |
| <i>RTO4_16284</i>                     | <i>HSD17B10</i>  | <i>H. sapiens</i>    | 3-hydroxyacyl-CoA dehydrogenase                 | 1.6           | 0.5  |
| <b>Other</b>                          |                  |                      |                                                 |               |      |
| <i>RTO4_12175</i>                     | <i>mesA</i>      | <i>A. nidulans</i>   | Myosin binding protein                          | 1.3           | 1.8  |
| <i>RTO4_8401</i>                      | <i>SHE4</i>      | <i>S. cerevisiae</i> | Transmembrane protein involved in cell polarity | 1.0           | 1.3  |
| <b>Unknown Function</b>               |                  |                      |                                                 |               |      |
| <i>RTO4_16524</i>                     |                  |                      | Protein of unknown function                     | 3.1           | 1.9  |
| <i>RTO4_11613</i>                     |                  |                      | Protein of unknown function                     | 2.5           | 1.7  |
| <i>RTO4_12505</i>                     |                  |                      | Protein of unknown function                     | 2.1           | 2.1  |
| <i>RTO4_13512</i>                     |                  |                      | Protein of unknown function                     | 1.5           | 1.9  |
| <i>RTO4_10805</i>                     |                  |                      | Protein of unknown function                     | 1.2           | 1.8  |
| <i>RTO4_15251</i>                     |                  |                      | Protein of unknown function                     | 1.6           | 1.3  |
| <i>RTO4_15358</i>                     |                  |                      | Protein of unknown function                     | 2.0           | 0.5  |
| <i>RTO4_13513</i>                     |                  |                      | Protein of unknown function                     | 1.3           | 1.2  |
| <i>RTO4_12461</i>                     |                  |                      | Protein of unknown function                     | 1.5           | 0.8  |
| <i>RTO4_13351</i>                     |                  |                      | Protein of unknown function                     | 1.2           | 1.0  |

**Table 2. Predicted gene function: Mutants with decreased lipid accumulation**

| Gene ID                               | Short Name         | Annotation From      | Description                                           | Cluster | Enrichment BD | FACS |
|---------------------------------------|--------------------|----------------------|-------------------------------------------------------|---------|---------------|------|
| <b>tRNA thiolation</b>                |                    |                      |                                                       |         |               |      |
| <i>RTO4_10764</i>                     | <i>NCS2</i>        | <i>S. cerevisiae</i> | tRNA 2-thiolation protein                             | LA7     | 0.5           | -2.3 |
| <i>RTO4_12817</i>                     | <i>NCS6</i>        | <i>S. cerevisiae</i> | tRNA 2-thiolation protein                             | LA7     | 0.7           | -2.6 |
| <i>RTO4_14918</i>                     | <i>ELP2</i>        | <i>S. cerevisiae</i> | Elongator complex protein                             | LA7     | 0.7           | -1.2 |
| <i>RTO4_14716</i>                     | <i>IKI3</i>        | <i>S. cerevisiae</i> | Elongator complex protein                             | LA7     | 0.4           | -1.1 |
| <i>RTO4_11341</i>                     | <i>UBA4</i>        | <i>S. cerevisiae</i> | Adenylyltransferase and sulfurtransferase             | LA7     | 0.6           | -2.6 |
| <b>G Protein Switches</b>             |                    |                      |                                                       |         |               |      |
| <sup>^^</sup> <i>RTO4_15198</i>       | <i>Rab6</i>        | <i>H. sapiens</i>    | GTPase                                                | LA6     | -1.3          | -1.6 |
| <i>RTO4_14622</i>                     | <i>RGP1</i>        | <i>H. sapiens</i>    | Guanine nucleotide exchange factor                    | LA6     | -1.4          | -1.5 |
| <b>Kinases and Phosphatases</b>       |                    |                      |                                                       |         |               |      |
| <i>RTO4_10698</i>                     | <i>VHS1</i>        | <i>S. cerevisiae</i> | Kinase                                                | LA6     | 0.8           | -3.7 |
| <i>RTO4_16375</i>                     | <i>HRK1</i>        | <i>S. cerevisiae</i> | Kinase                                                | LA6     | 0.4           | -2.2 |
| <sup>^</sup> <i>RTO4_11453</i>        | <i>GLC7</i>        | <i>S. cerevisiae</i> | Kinase                                                | LA8     | -1.2          | -0.9 |
| <i>RTO4_16810</i>                     | <i>KIN1</i>        | <i>S. cerevisiae</i> | Kinase                                                | LA6     | 0.1           | -1.1 |
| <i>RTO4_10025</i>                     | <i>SAT4</i>        | <i>S. cerevisiae</i> | Kinase                                                | LA7     | 1.6           | -3.6 |
| <i>RTO4_13327</i>                     | <i>ATG1</i>        | <i>S. cerevisiae</i> | Kinase                                                | LA6     | 0.1           | -2.5 |
| <i>RTO4_14907</i>                     | <i>SCH9</i>        | <i>S. cerevisiae</i> | Kinase                                                | LA6     | -0.6          | -2.0 |
| <i>RTO4_14906</i>                     | <i>kinase-like</i> | <i>S. cerevisiae</i> | Kinase                                                | LA6     | -0.3          | -1.8 |
| <i>RTO4_13290</i>                     | <i>YAK1</i>        | <i>S. cerevisiae</i> | Kinase                                                | LA8     | -1.1          | -0.9 |
| <i>RTO4_11732</i>                     | <i>PPH3</i>        | <i>S. cerevisiae</i> | Phosphatase 4 catalytic subunit                       | LA6     | 0.9           | -3.6 |
| <i>RTO4_12586</i>                     | <i>PSY2</i>        | <i>S. cerevisiae</i> | Phosphatase 4 regulatory subunit                      | LA6     | 0.2           | -1.2 |
| <i>RTO4_16463</i>                     | <i>PTC7-like</i>   | <i>S. cerevisiae</i> | Phosphatase                                           | LA6     | 0.1           | -2.0 |
| <b>Autophagy</b>                      |                    |                      |                                                       |         |               |      |
| <i>RTO4_13327</i>                     | <i>ATG1</i>        | <i>S. cerevisiae</i> | Kinase                                                | LA6     | 0.1           | -2.5 |
| <i>RTO4_13598</i>                     | <i>ATG2</i>        | <i>S. cerevisiae</i> | Membrane protein                                      | LA6     | -0.6          | -3.4 |
| <i>RTO4_12968</i>                     | <i>ATG3</i>        | <i>S. cerevisiae</i> | Ubiquitin-like-conjugating enzyme                     | LA6     | -0.8          | -4.5 |
| <i>RTO4_13496</i>                     | <i>ATG4</i>        | <i>S. cerevisiae</i> | Cysteine protease                                     | LA6     | -0.1          | -2.3 |
| <i>RTO4_11901</i>                     | <i>ATG7</i>        | <i>S. cerevisiae</i> | Ubiquitin-like modifier-activating enzyme             | LA6     | -0.8          | -4.2 |
| <i>RTO4_13543</i>                     | <i>ATG8</i>        | <i>S. cerevisiae</i> | Ubiquitin-like protein                                | LA6     | -1.0          | -4.2 |
| <i>RTO4_11326</i>                     | <i>ATG9</i>        | <i>S. cerevisiae</i> | Membrane protein                                      | LA6     | 0.0           | -1.3 |
| <i>RTO4_9008</i>                      | <i>ATG14</i>       | <i>S. cerevisiae</i> | Autophagy-specific subunit of PtdIns3P-kinase complex | LA6     | 0.0           | -5.0 |
| <i>RTO4_16723</i>                     | <i>ATG18</i>       | <i>S. cerevisiae</i> | Phosphoinositide binding protein                      | LA6     | -0.9          | -5.8 |
| <b>Ubiquitination and Proteolysis</b> |                    |                      |                                                       |         |               |      |
| <sup>^^</sup> <i>RTO4_16672</i>       | <i>PRB1</i>        | <i>S. cerevisiae</i> | Vacuolar proteinase                                   | LA6     | -0.2          | -1.7 |
| <i>RTO4_15345</i>                     | <i>SIS1</i>        | <i>S. cerevisiae</i> | Protein chaperone                                     | LA6     | -0.4          | -1.2 |
| <i>RTO4_10423</i>                     | <i>RMD5</i>        | <i>S. cerevisiae</i> | GID complex E3 ubiquitin ligase                       | LA6     | -0.4          | -2.0 |
| <i>RTO4_11737</i>                     | <i>GID8</i>        | <i>H. sapiens</i>    | GID complex member                                    | LA6     | -0.1          | -1.5 |
| <i>RTO4_9816</i>                      | <i>LONRF1</i>      | <i>H. sapiens</i>    | E3 ubiquitin ligase                                   | LA6     | -0.5          | -4.5 |
| <i>RTO4_15320</i>                     | <i>USP48</i>       | <i>H. sapiens</i>    | Ubiquitin carboxyl-terminal hydrolase                 | LA6     | 0.0           | -1.2 |
| <i>RTO4_9600</i>                      | <i>COPS3</i>       | <i>H. sapiens</i>    | COP9 signalosome complex subunit                      | LA1     | 1.4           | 0.6  |
| <i>RTO4_11569</i>                     | <i>GPS1</i>        | <i>H. sapiens</i>    | COP9 signalosome complex subunit                      | LA6     | 0.7           | -2.1 |
| <b>Triacylglyceride Synthesis</b>     |                    |                      |                                                       |         |               |      |
| <sup>^^</sup> <i>RTO4_12154</i>       | <i>GPD1</i>        | <i>S. cerevisiae</i> | Glycerol-3-phosphate dehydrogenase                    | LA6     | -1.7          | -4.0 |
| <i>RTO4_11043</i>                     | <i>BCSL2-like</i>  | <i>H. sapiens</i>    | Seipin                                                | LA6     | -0.8          | -2.9 |
| <i>RTO4_16460</i>                     | <i>DGA1</i>        | <i>H. sapiens</i>    | Diacylglycerol acyltransferase                        | LA6     | -0.7          | -4.0 |
| <i>RTO4_14597</i>                     | <i>ACS1</i>        | <i>S. cerevisiae</i> | Acetyl-CoA synthetase                                 | LA8     | -1.7          | -1.0 |
| <i>RTO4_10182</i>                     | <i>YEF1</i>        | <i>S. cerevisiae</i> | NAD <sup>+</sup> kinase                               | LA6     | -0.1          | -1.6 |
| <sup>v</sup> <i>RTO4_11039</i>        | <i>GUT2</i>        | <i>S. cerevisiae</i> | Glycerol-3-phosphate dehydrogenase                    | LA6     | -0.2          | -1.1 |

**Table 2. Predicted gene function: Mutants with decreased lipid accumulation. (continued)**

| Gene ID                                       | Short Name          | Annotation From      | Description                                     | Cluster | Enrichment BD | FACS |
|-----------------------------------------------|---------------------|----------------------|-------------------------------------------------|---------|---------------|------|
| <b>Lipid Droplet Associated</b>               |                     |                      |                                                 |         |               |      |
| <i>RTO4_16381</i>                             | <i>PLIN1-like</i>   | <i>S. cerevisiae</i> | Perilipin                                       | LA6     | -1.7          | -4.3 |
| v <i>RTO4_11039</i>                           | <i>GUT2</i>         | <i>S. cerevisiae</i> | Glycerol-3-phosphate dehydrogenase              | LA6     | -0.2          | -1.1 |
| <i>RTO4_15372</i>                             | <i>EGH1</i>         | <i>S. cerevisiae</i> | Steryl-beta-glucosidase                         | LA6     | 0.7           | -2.5 |
| <i>RTO4_13614</i>                             | <i>RIP1</i>         | <i>S. cerevisiae</i> | Mitochondrial complex III iron-sulfur protein   | LA6     | -0.5          | -2.8 |
| <i>RTO4_11043</i>                             | <i>BCSL2-like</i>   | <i>H. sapiens</i>    | Seipin                                          | LA6     | -0.8          | -2.9 |
| <i>RTO4_16460</i>                             | <i>DGA1</i>         | <i>H. sapiens</i>    | Diacylglycerol acyltransferase                  | LA6     | -0.7          | -4.0 |
| <b>Protein Modification</b>                   |                     |                      |                                                 |         |               |      |
| <i>RTO4_12670</i>                             | <i>B3GALT1-like</i> | <i>H. sapiens</i>    | Beta-1,3-Galactosyltransferase                  | LA6     | -0.9          | -3.1 |
| <b>Protein Trafficking</b>                    |                     |                      |                                                 |         |               |      |
| ^^ <i>RTO4_15198</i>                          | <i>Rab6</i>         | <i>H. sapiens</i>    | GTPase                                          | LA6     | -1.3          | -1.6 |
| <b>Other ER/Golgi Proteins</b>                |                     |                      |                                                 |         |               |      |
| <i>RTO4_8838</i>                              | <i>DNAJC4</i>       | <i>H. sapiens</i>    | DnaJ family chaperone                           | LA6     | -0.8          | -1.3 |
| <i>RTO4_13971</i>                             | <i>DNAJC3</i>       | <i>H. sapiens</i>    | DnaJ family chaperone                           | LA6     | -1.1          | -2.2 |
| <b>Gene Expression</b>                        |                     |                      |                                                 |         |               |      |
| <i>RTO4_11333</i>                             | <i>KLF18-like</i>   | <i>H. sapiens</i>    | Transcription factor                            | LA6     | -0.2          | -1.1 |
| <i>RTO4_15641</i>                             | <i>SKN7</i>         | <i>S. cerevisiae</i> | Transcription factor                            | LA6     | 0.9           | -2.9 |
| <i>RTO4_14676</i>                             | <i>LHX5-like</i>    | <i>H. sapiens</i>    | Transcription factor                            | LA6     | -0.2          | -2.8 |
| <i>RTO4_11891</i>                             | <i>HAP2</i>         | <i>S. cerevisiae</i> | Transcription factor                            | LA6     | -0.8          | -2.4 |
| <i>RTO4_12420</i>                             | <i>OPI1-like</i>    | <i>S. cerevisiae</i> | Transcription factor                            | LA6     | 0.0           | -3.7 |
| <i>RTO4_14100</i>                             | <i>HAPX</i>         | <i>C. neoformans</i> | Transcription factor                            | LA8     | -1.2          | -1.7 |
| <i>RTO4_13255</i>                             | <i>SGF73</i>        | <i>S. cerevisiae</i> | SAGA-associated factor                          | LA6     | 0.4           | -1.5 |
| <b>Methylcitrate Cycle</b>                    |                     |                      |                                                 |         |               |      |
| <i>RTO4_14162</i>                             | <i>ICL2</i>         | <i>S. cerevisiae</i> | 2-methylisocitrate lyase                        | LA6     | -0.3          | -1.8 |
| <i>RTO4_12642</i>                             | <i>PDH1</i>         | <i>S. cerevisiae</i> | 2-methylcitrate dehydratase                     | LA6     | -0.1          | -1.7 |
| <b>Electron Transport and Redox Balancing</b> |                     |                      |                                                 |         |               |      |
| <i>RTO4_11165</i>                             | <i>CBP4</i>         | <i>S. cerevisiae</i> | Mitochondrial complex III assembly factor       | LA6     | -0.4          | -2.5 |
| <i>RTO4_13614</i>                             | <i>RIP1</i>         | <i>S. cerevisiae</i> | Mitochondrial complex III iron-sulfur protein   | LA6     | -0.5          | -2.8 |
| <i>RTO4_13902</i>                             | <i>AFG1</i>         | <i>S. cerevisiae</i> | Mitochondrial complex IV assembly factor        | LA6     | -0.3          | -1.3 |
| v <i>RTO4_10010</i>                           | <i>NDUFS4</i>       | <i>H. sapiens</i>    | Mitochondrial complex I accessory factor        | LA8     | -1.3          | -0.1 |
| <i>RTO4_13925</i>                             | <i>NDUFAF3</i>      | <i>H. sapiens</i>    | Mitochondrial complex I assembly factor         | LA8     | -1.0          | -1.6 |
| <b>Amino Acid Biosynthesis</b>                |                     |                      |                                                 |         |               |      |
| ^^ <i>RTO4_12302</i>                          | <i>CPA2</i>         | <i>S. cerevisiae</i> | Large subunit of carbamoyl phosphate synthetase | LA6     | -0.4          | -2.4 |
| <b>Glucose and Energy Metabolism</b>          |                     |                      |                                                 |         |               |      |
| <i>RTO4_10423</i>                             | <i>RMD5</i>         | <i>S. cerevisiae</i> | GID complex E3 ubiquitin ligase                 | LA6     | -0.4          | -2.0 |
| <i>RTO4_11737</i>                             | <i>GID8</i>         | <i>H. sapiens</i>    | GID complex member                              | LA6     | -0.1          | -1.5 |
| <i>RTO4_12034</i>                             | <i>TPS2</i>         | <i>S. cerevisiae</i> | Trehalose 6-phosphate synthase                  | LA6     | 0.0           | -3.8 |
| ^ <i>RTO4_10264</i>                           | <i>GLK1</i>         | <i>S. cerevisiae</i> | Hexokinase                                      | LA7     | 2.1           | -2.0 |
| <b>Transporters</b>                           |                     |                      |                                                 |         |               |      |
| ^^ <i>RTO4_12909</i>                          | <i>OAT1</i>         | <i>C. neoformans</i> | Nucleobase transporter                          | LA6     | -0.2          | -1.1 |
| <i>RTO4_11397</i>                             | <i>COT1</i>         | <i>S. cerevisiae</i> | Vacuolar zinc transporter                       | LA6     | -0.2          | -1.1 |
| <i>RTO4_11924</i>                             | <i>SNF3</i>         | <i>S. cerevisiae</i> | Plasma membrane low glucose sensor              | LA6     | 0.0           | -2.8 |

**Table 2. Predicted gene function: Mutants with decreased lipid accumulation. (continued)**

| Gene ID        | Short Name   | Annotation From      | Description                                         | Cluster | Enrichment BD | FACS |
|----------------|--------------|----------------------|-----------------------------------------------------|---------|---------------|------|
| <b>Other</b>   |              |                      |                                                     |         |               |      |
| RTO4_12512     | <i>cry</i>   | <i>N. crassa</i>     | Blue-light photoreceptor cryptochrome               | LA7     | 0.6           | -1.6 |
| RTO4_14974     |              |                      | Steroidogenesis/phosphatidylcholine transfer domain | LA6     | -0.3          | -1.2 |
| RTO4_15889     | <i>MAEA</i>  | <i>H. sapiens</i>    | EMP macrophage erythroblast attacher                | LA6     | -0.1          | -1.7 |
| RTO4_16287     | <i>CDD1</i>  | <i>S. cerevisiae</i> | Cytidine deaminase                                  | LA6     | 0.3           | -2.3 |
| RTO4_15247     | <i>WDR26</i> | <i>H. sapiens</i>    | WD repeat protein                                   | LA6     | -0.9          | -1.3 |
| RTO4_8764      | <i>MGS1</i>  | <i>S. cerevisiae</i> | DNA-dependent ATPase and ssDNA annealing protein    | LA6     | 0.2           | -1.2 |
| <b>Unknown</b> |              |                      |                                                     |         |               |      |
| RTO4_10431     |              |                      | Protein of unknown function                         | LA6     | 0.7           | -1.6 |
| RTO4_8973      |              |                      | Protein of unknown function                         | LA8     | -0.2          | -1.1 |
| RTO4_13195     |              |                      | Protein of unknown function                         | LA6     | -0.2          | -1.1 |
| RTO4_10367     |              |                      | Protein of unknown function                         | LA6     | -0.1          | -1.3 |
| RTO4_10102     |              |                      | Protein of unknown function                         | LA6     | -0.3          | -1.2 |
| RTO4_14926     |              |                      | Protein of unknown function                         | LA6     | 0.2           | -1.7 |
| RTO4_12045     |              |                      | Protein of unknown function                         | LA6     | 0.0           | -1.5 |
| RTO4_13600     |              |                      | Protein of unknown function                         | LA6     | -0.3          | -1.3 |
| RTO4_10976     |              |                      | Protein of unknown function                         | LA6     | -0.2          | -1.5 |
| RTO4_9970      | <i>LDB17</i> | <i>S. cerevisiae</i> | Protein of unknown function                         | LA8     | -1.3          | -0.5 |
| RTO4_13435     |              |                      | Protein of unknown function                         | LA7     | 0.2           | -2.0 |
| RTO4_9692      |              |                      | Protein of unknown function                         | LA6     | -0.5          | -1.4 |
| RTO4_15521     |              |                      | Protein of unknown function                         | LA6     | 0.2           | -2.2 |
| RTO4_8769      |              |                      | Protein of unknown function                         | LA6     | -0.5          | -1.6 |
| RTO4_8770      |              |                      | Protein of unknown function                         | LA6     | -0.5          | -1.9 |
| RTO4_11259     |              |                      | Protein of unknown function                         | LA7     | 0.7           | -3.3 |
| RTO4_9490      |              |                      | Protein of unknown function                         | LA6     | -0.6          | -2.4 |
| RTO4_15520     |              |                      | Protein of unknown function                         | LA6     | -0.5          | -2.5 |
| RTO4_8771      |              |                      | Protein of unknown function                         | LA6     | -0.6          | -2.5 |
| RTO4_13452     |              |                      | Protein of unknown function                         | LA6     | -1.3          | -4.0 |
| RTO4_15211     |              |                      | Protein of unknown function                         | LA8     | -1.1          | -1.5 |
